# Supplementary material for: Genome-wide promoter methylation analysis in neuroblastoma identifies prognostic methylation biomarkers
Source: PubMed Central journal article supplement (PMC3491423; doi:10.1186/gb-2012-13-10-r95), 2012-10-03

**Part LC480 clinical annotation:** Patient characteristics of the samples used for the high-throughput MSP screening on the Roche LC480. PatientID is a unique patient number, the group indicates the risk. Clinical characteristics given are the age at diagnosis in months, International Neuroblastoma Staging System (INSS) stage, *MYCN* status (0 is non-amplified/single copy and 1 is amplified), follow-up time (FU) in days after diagnosis, and overall survival (OS) and event-free survival (EFS) time in days after diagnosis. OS indicates whether the patient was alive (0) at the last known FU or died of disease (1). Similar for EFS, indicating events such as relapse or progression. Segmental aberrations for chromosome 1p, 11q and 17q are indicated with normal, partial loss (PL), whole loss (WL), partial gain (PG) or whole gain (WG). Empty cells represent missing values.

**Part LC480 overview annotation:** Summary of the clinical characteristics of the 89 primary neuroblastoma samples used in the high-throughput MSP screening. HR-DOD: high-risk deceased patients, HR-SURV: high-risk patients alive for at least 1000 days follow-up, LR-SURV: low-risk patients alive for at least 1000 days follow-up, and INSS: International Neuroblastoma Staging System.

**Part LC480 assays:** MSP assays used in the high-throughput MSP screening on the Roche LC480. For each tested gene, the assay name(s) and corresponding forward and reverse primer(s) (5' to 3') are indicated, as well as the genomic location of the amplicon on the hg19 reference genome.

**Part LC480 results:** Results of the high-throughput MSP screening on the Roche LC480. For each assay and for each sample, the methylation call (dark blue is methylated, green

unmethylated) is given. The patient samples are subdivided into three prognostic groups (LR-SURV, HR-DOD and HR-SURV). HR-DOD: high-risk deceased patients, HR-SURV: high-risk patients alive for at least 1000 days follow-up, LR-SURV: low-risk patients alive for at least 1000 days follow-up, CL: cell line, Neg: negative control (HCT-116 DKO cell line), and NTC: no template control.

**Part LC480 overview results:** Summary of the MSP results of the high-throughput study. The number of methylated samples for a particular MSP assay within each prognostic group and for the entire sample set is given (percentage of methylated samples between brackets). Assays are ranked descending on the number of overall methylated samples. Assays discussed in more detail in the results section are indicated in grey. HR-DOD: high-risk deceased patients, HR-SURV: high-risk patients alive for at least 1000 days follow-up, LR-SURV: low-risk patients alive for at least 1000 days follow-up.

**Part Group associations:** Detailed information on a selection of assays, differentially methylated between prognostic groups (per prognostic group and per combination of risk factors). The number (percentage) of methylated samples in each stratum is given. HR-DOD: high-risk deceased patients, HR-SURV: high-risk patients alive for at least 1000 days follow-up, LR-SURV: low-risk patients alive for at least 1000 days follow-up.

**Part Risk factor associations:** Detailed information on a selection of assays, differentially methylated between neuroblastoma risk factors (per (combination of) risk factors). The number (percentage) of methylated samples in each stratum is given. HR-DOD:

high-risk deceased patients, HR-SURV: high-risk patients alive for at least 1000 days follow-up, LR-SURV: low-risk patients alive for at least 1000 days follow-up.

**Part Heatmap:** Hierarchical clustering based on the MSP data of the 89 primary neuroblastoma tumor samples. This analysis reveals two clusters, indicated with group 1 and group 2, which predominantly distinguish high-risk and low-risk neuroblastoma patient samples. Each sample is assigned to a prognostic group (LR-SURV, HR-DOD and HR-SURV). HR-DOD: high-risk deceased patients, HR-SURV: high-risk patients alive for at least 1000 days follow-up and LR-SURV: low-risk patients alive for at least 1000 days follow-up.

**Part KM number:** Kaplan-Meier plot: overall survival in the samples of the high-throughput MSP screening according to the number of methylation events. The purple line indicates patients with 0 to 16 methylation events, the red line patients with 16 to 27 methylation events. This 16 methylation events cut-off was used, as the average number of methylation events in one sample is 16. The p-value is determined using a log-rank test (Mantel-Cox). Time is indicated in days, starting from diagnosis.

| PatientID | Group   | Age at diagnosis (months) | INSS Stage | MYCN | Chr1p  | Chr17q | Chr11q | FU time (days) | OS time (days) | EFS time (days) | OS | EFS |
|-----------|---------|---------------------------|------------|------|--------|--------|--------|----------------|----------------|-----------------|----|-----|
| 5         | HR-DOD  | 146                       | 4          | 1    | PL     |        | WL     | 754            | 754            | 281             | 1  | 1   |
| 41        | HR-DOD  | 51                        | 4          | 0    | normal |        | WL     | 569            | 569            | 397             | 1  | 1   |
| 384       | HR-DOD  | 28                        | 4          | 0    | normal |        | WL     | 966            | 966            | 890             | 1  | 1   |
| 513       | HR-DOD  | 30                        | 4          | 1    | PL     |        | normal | 167            | 167            | 142             | 1  | 1   |
| 610       | HR-DOD  | 35                        | 4          | 1    | normal |        | WL     | 850            | 850            | 782             | 1  | 1   |
| 906       | HR-DOD  | 19                        | 3          | 1    | PL     | PG     | normal | 216            | 216            | 53              | 1  | 1   |
| 917       | HR-DOD  | 92                        | 4          | 1    | PL     | PG     | normal | 485            | 485            | 439             | 1  | 1   |
| 928       | HR-DOD  | 12                        | 4          | 1    | PL     | PG     | normal | 412            | 412            | 286             | 1  | 1   |
| 1015      | HR-DOD  | 42                        | 4          | 0    | normal |        | WL     | 581            | 581            | 449             | 1  | 1   |
| 1378      | HR-DOD  | 155                       | 4          | 0    | normal |        | WL     | 4910           | 4910           | 3793            | 1  | 1   |
| 1467      | HR-DOD  | 0                         | 4          | 1    | normal | PG     | normal | 1              | 1              | 1               | 1  | 1   |
| 1473      | HR-DOD  | 8                         | 4          | 1    | PL     | PG     | normal | 239            | 239            | 116             | 1  | 1   |
| 1477      | HR-DOD  | 79                        | 4          | 1    | PL     | PG     | normal | 1246           | 1246           | 898             | 1  | 1   |
| 1507      | HR-DOD  | 14                        | 4          | 1    |        |        |        | 285            | 285            | 273             | 1  | 1   |
| 1517      | HR-DOD  | 35                        | 4          | 0    | normal | PG     | PL     | 547            | 547            | 433             | 1  | 1   |
| 1520      | HR-DOD  | 40                        | 4          | 1    | normal | PG     | PL     | 1279           | 1279           | 552             | 1  | 1   |
| 1522      | HR-DOD  | 23                        | 3          | 1    | PL     | PG     | normal | 728            | 728            | 594             | 1  | 1   |
| 1527      | HR-DOD  | 108                       | 4          | 1    | PL     | normal | normal | 319            | 319            |                 | 1  | 1   |
| 1648      | HR-DOD  | 53                        | 4          | 0    | normal | PG     | PL     | 1221           | 1221           | 341             | 1  | 1   |
| 1781      | HR-DOD  | 41                        | 4          | 1    |        |        |        | 679            | 679            | 651             | 1  | 1   |
| 2859      | HR-DOD  | 63                        | 3          | 1    |        |        |        | 4493           | 4493           | 3861            | 1  | 1   |
| 2865      | HR-DOD  | 91                        | 4          | 0    |        |        |        | 1353           | 1353           | 1353            | 1  | 1   |
| 2866      | HR-DOD  | 80                        | 4          | 0    |        |        |        | 1300           | 1300           | 786             | 1  | 1   |
| 2869      | HR-DOD  | 72                        | 4          | 0    |        |        |        | 1380           | 1380           | 1011            | 1  | 1   |
| E061      | HR-DOD  | 31                        | 4          | 0    | normal | PG     | PL     | 1445           | 1445           | 497             | 1  | 1   |
| E069      | HR-DOD  | 59                        | 4          | 0    | normal | PG     | PL     | 2836           | 2836           | 2016            | 1  | 1   |
| E282      | HR-DOD  | 17                        | 4          | 1    | PL     | PG     | normal | 711            | 711            | 433             | 1  | 1   |
| E290      | HR-DOD  | 6                         | 4          | 1    | PL     | normal | normal | 539            | 539            | 531             | 1  | 1   |
| 526       | HR-SURV | 26                        | 4          | 1    | normal | PG     | normal | 2009           | 2009           |                 | 0  | 0   |
| 915       | HR-SURV | 16                        | 4          | 1    | PL     |        | normal | 1985           | 1985           |                 | 0  | 0   |
| 1017      | HR-SURV | 22                        | 3          | 1    | PL     | PG     | normal | 1758           | 1758           |                 | 0  | 0   |
| 1148      | HR-SURV | 27                        | 3          | 1    |        |        |        | 1212           | 1212           |                 | 0  | 0   |
| 1384      | HR-SURV | 16                        | 3          | 1    |        |        |        | 1620           | 1620           |                 | 0  | 0   |
| 1385      | HR-SURV | 31                        | 3          | 1    |        |        |        | 1185           | 1185           |                 | 0  | 0   |
| 1431      | HR-SURV | 23                        | 4          | 1    | PL     | PG     | normal | 953            | 953            |                 | 0  | 0   |
| 1501      | HR-SURV | 131                       | 4          | 0    |        |        |        | 1558           | 1558           | 1558            | 0  | 1   |
| 1508      | HR-SURV | 6                         | 2          | 1    |        |        |        | 1449           | 1449           |                 | 0  | 0   |
| 1521      | HR-SURV | 38                        | 4          | 1    | normal | WG     | WL     | 2163           | 2163           |                 | 0  | 0   |
| 1524      | HR-SURV | 23                        | 3          | 1    | PL     | PG     | WL     | 2387           | 2387           |                 | 0  | 0   |
| 1647      | HR-SURV | 10                        | 2          | 1    |        |        |        | 2136           | 2136           |                 | 0  | 0   |
| 1789      | HR-SURV | 25                        | 3          | 1    |        |        |        | 5616           | 5616           |                 | 0  | 0   |
| 1793      | HR-SURV | 33                        | 3          | 1    |        |        |        | 1176           | 1176           |                 | 0  | 0   |
| 1794      | HR-SURV | 33                        | 3          | 1    |        |        |        | 5096           | 5096           |                 | 0  | 0   |
| 1800      | HR-SURV | 71                        | 4          | 1    |        |        |        | 1862           | 1862           |                 | 0  | 0   |
| 2855      | HR-SURV | 32                        | 3          | 1    |        |        |        | 1386           | 1386           |                 | 0  | 0   |
| 2856      | HR-SURV | 41                        | 3          | 1    |        |        |        | 1330           | 1330           | 834             | 0  | 1   |
| 2857      | HR-SURV | 29                        | 3          | 1    |        |        |        | 1295           | 1295           |                 | 0  | 0   |
| 2860      | HR-SURV | 66                        | 3          | 1    |        |        |        | 1489           | 1489           |                 | 0  | 0   |
| 2861      | HR-SURV | 19                        | 3          | 1    |        |        |        | 1514           | 1514           | 445             | 0  | 1   |
| 2862      | HR-SURV | 43                        | 2          | 1    |        |        |        | 1161           | 1161           |                 | 0  | 0   |
| 2863      | HR-SURV | 11                        | 4          | 1    |        |        |        | 1237           | 1237           |                 | 0  | 0   |
| 2864      | HR-SURV | 26                        | 4          | 0    |        |        |        | 1310           | 1310           |                 | 0  | 0   |
| 2867      | HR-SURV | 46                        | 4          | 0    |        |        |        | 1112           | 1112           |                 | 0  | 0   |
| E458      | HR-SURV | 7                         | 4          | 0    | normal | PG     | PL     | 2284           | 2284           | 1399            | 0  | 1   |
| E579      | HR-SURV | 13                        | 4          | 0    | normal | PG     | PL     | 3534           | 3534           |                 | 0  | 0   |
| E598      | HR-SURV | 49                        | 4          | 0    | PL     | PG     | PL     | 3219           | 3219           |                 | 0  | 0   |
| E685      | HR-SURV | 14                        | 4          | 0    | normal | PG     | PL     | 3011           | 3011           |                 | 0  | 0   |
| E700      | HR-SURV | 20                        | 4          | 0    | PL     | normal | PL     | 1536           | 1536           |                 | 0  | 0   |
| 410       | LR-SURV | 2                         | 1          | 0    | normal | WG     | WL     | 2910           | 2910           |                 | 0  | 0   |
| 414       | LR-SURV | 3                         | 1          | 0    |        |        |        | 2951           | 2951           |                 | 0  | 0   |
| 530       | LR-SURV | 2                         | 1          | 0    | normal | WG     | normal | 2216           | 2216           |                 | 0  | 0   |
| 566       | LR-SURV | 0                         | 2a         | 0    | normal | WG     | WL     | 1615           | 1615           |                 | 0  | 0   |
| 744       | LR-SURV | 16                        | 2b         | 0    | normal | WG     | normal | 1850           | 1850           |                 | 0  | 0   |
| 809       | LR-SURV | 0                         | 1          | 0    | normal | WG     | normal | 2904           | 2904           |                 | 0  | 0   |
| 820       | LR-SURV | 11                        | 2          | 0    |        |        |        | 4794           | 4794           |                 | 0  | 0   |
| 822       | LR-SURV | 13                        | 1          | 0    | normal |        |        | 1153           | 1153           |                 | 0  | 0   |
| 823       | LR-SURV | 4                         | 1          | 0    | normal |        | normal | 1090           | 1090           |                 | 0  | 0   |
| 858       | LR-SURV | 1                         | 1          | 0    | normal |        | normal | 1562           | 1562           |                 | 0  | 0   |
| 912       | LR-SURV | 0                         | 1          | 0    |        |        |        | 2904           | 2904           |                 | 0  | 0   |
| 916       | LR-SURV | 10                        | 1          | 0    | normal | WG     | WL     | 3830           | 3830           |                 | 0  | 0   |
| 926       | LR-SURV | 1                         | 1          | 0    | normal | WG     | WL     | 1861           | 1861           |                 | 0  | 0   |
| 929       | LR-SURV | 3                         | 1          | 0    | normal | WG     | WL     | 1076           | 1076           |                 | 0  | 0   |
| 1028      | LR-SURV | 3                         | 1          | 0    | normal |        |        | 2932           | 2932           |                 | 0  | 0   |
| 1038      | LR-SURV | 11                        | 2          | 0    |        |        |        | 1071           | 1071           |                 | 0  | 0   |
| 1039      | LR-SURV | 8                         | 3          | 0    |        |        |        | 1394           | 1394           |                 | 0  | 0   |
| 1377      | LR-SURV | 3                         | 2          | 0    | normal |        | normal | 2511           | 2511           |                 | 0  | 0   |
| 1395      | LR-SURV | 1                         | 1          | 0    |        |        |        | 2027           | 2027           |                 | 0  | 0   |
| 1468      | LR-SURV | 7                         | 2          | 0    | WG     | WG     | WL     | 1808           | 1808           |                 | 0  | 0   |
| 1476      | LR-SURV | 22                        | 2          | 0    |        |        |        | 2075           | 2075           |                 | 0  | 0   |
| 1478      | LR-SURV | 1                         | 1          | 0    |        |        |        | 1066           | 1066           |                 | 0  | 0   |
| 1479      | LR-SURV | 3                         | 1          | 0    | normal | WG     | normal | 1156           | 1156           |                 | 0  | 0   |
| 1486      | LR-SURV | 12                        | 1          | 0    | normal | WG     | normal | 2328           | 2328           |                 | 0  | 0   |
| 1487      | LR-SURV | 7                         | 1          | 0    |        |        |        | 1463           | 1463           |                 | 0  | 0   |
| 1488      | LR-SURV | 2                         | 2          | 0    |        |        |        | 1827           | 1827           |                 | 0  | 0   |
| 1492      | LR-SURV | 0                         | 1          | 0    |        |        |        | 1316           | 1316           |                 | 0  | 0   |
| 1528      | LR-SURV | 10                        | 1          | 0    |        |        |        | 1622           | 1622           |                 | 0  | 0   |
| 1531      | LR-SURV | 2                         | 1          | 0    | normal | WG     | normal | 1593           | 1593           |                 | 0  | 0   |
| 1612      | LR-SURV | 6                         | 1          | 0    | normal | WG     | normal | 2271           | 2271           |                 | 0  | 0   |
| 1650      | LR-SURV | 1                         | 2          | 0    | normal | WG     | WL     | 1264           | 1264           | 187             | 0  | 1   |

| <b>Characteristic</b>      | <b>Classes</b>               | <b>Count (percentage)</b> |
|----------------------------|------------------------------|---------------------------|
| <b>Risk Classification</b> | HR-DOD                       | 28/89 (31%)               |
|                            | HR-SURV                      | 30/89 (34%)               |
|                            | LR-SURV                      | 31/89 (35%)               |
| <b>INSS Stage</b>          | 1                            | 21/89 (24%)               |
|                            | 2                            | 12/89 (13%)               |
|                            | 3                            | 17/89 (19%)               |
|                            | 4                            | 39/89 (44%)               |
| <b>MYCN</b>                | Not amplified                | 50/89 (56%)               |
|                            | Amplified                    | 39/89 (44%)               |
| <b>Age</b>                 | Age at diagnosis > 12 months | 53/89 (60%)               |
|                            | Age at diagnosis < 12 months | 36/89 (40%)               |

| Name            | Forward primer             | Reverse primer                | Genomic location         |
|-----------------|----------------------------|-------------------------------|--------------------------|
| TGFBI_18014     | ATTTTGGCGGGTTTCGTTA        | ACTCGACTTACCCGTAATAAC         | chr5:135364804-135364889 |
| ACTB_1          | TAGGAGTATATAGTTGGGGAAGTT   | AACACACAATAACAAACACAAATTCAC   | chr7:5571799-5571902     |
| TNFRSF10D_23780 | TCGGGGTATAAAGCGGAG         | ATCAAAAATCGTCCCGTAA           | chr8:23021486-23021578   |
| KRT19_83159     | GGTCGCGGGTATAAAGGC         | CATAACGAAACGAAACACGAAAC       | chr17:39684496-39684598  |
| KRT19_61596     | TTATAGTTATCGTTAGTCGTCGGT   | ACCCCCGTAAATACTAAACGC         | chr17:39684382-39684491  |
| TNFRSF10A_65529 | GGTATTTAGTAGGCGTTCGGTG     | ACTCGCCGATAATAACGAAA          | chr8:23082862-23082978   |
| RARRES1_57581   | GCGAAATCGTAGGGGAAAC        | ATAAAAACGCCTCCCGGAAA          | chr3:158450497-158450595 |
| CYGB_83388      | TCGTGTGGTAAGAGTTAATGTCG    | CTCCGCGTAACCTACGAA            | chr17:74533911-74534004  |
| FBN2_18150      | TCGGAGTTTATAGGGAACGAA      | CTCTTACTAACCCGACGCC           | chr5:127873815-127873902 |
| PDLIM4_4        | GCGGTTTAGGTTAATTTTTCTG     | CGATCCCATATCTAAAACCGA         | chr5:131593549-131593644 |
| CXCR4_70046     | GCGTGGGTGTAGTGGGTAGTC      | TAAAAACCTCCAACGATAAACACG      | chr2:136874383-136874463 |
| RBP4_24106      | GGTCGTTTCGTTGTTTTATAGC     | GCGTTATACAAATACCCCGG          | chr10:95361003-95361106  |
| RBP1_83281      | TGCGTTTCGTTTTCTGTTAAGC     | CTAAATTCCCAACGCGCAC           | chr3:139258517-139258597 |
| NPTX2_57773     | TTTTAGTTTGTGACGTTCCGCTT    | TAAACTCTCGAAAACCTCGACT        | chr7:98246269-98246349   |
| PPIC_69739      | CGGTTGTTGTTATTTTTCTGTT     | CTCTCGATCACCTTAACCGTC         | chr5:122372192-122372305 |
| NPY_18477       | TTTTATTCGATGGCGTTGTC       | AACAACCTAACGATCTCCCTACGA      | chr7:24324196-24324288   |
| FAS_18143       | TTTTTGATTATCGGGGTTTTTC     | AACCAATCACTCGTAAACCG          | chr10:90750369-90750484  |
| EDNRB_1         | CGTTTTAGTTAAGCGTGCCTG      | CGAAATATAAAAATTCCTACGTA       | chr13:78493099-78493204  |
| DPP4_74913      | TGGCGAAGAGGTTTTATAGTTC     | TACGCTCCTTCTTAAACGCTC         | chr2:162930431-162930534 |
| FBN2_18151      | TTGGAGATTTTCGATAGAGCGT     | AAACTCCGACTACACCTCCG          | chr5:127873440-127873551 |
| NTRK1_1259      | TTTTACGGGATTAGATTTAAGTTTCG | AACGAAAACGCGATAACCTT          | chr1:156783919-156784031 |
| NEBL_1678       | TTTTGGGACGTAGGTTTTCG       | AACCGTCTCTACTACGCG            | chr10:21463545-21463628  |
| PDE4DIP_1689    | GCGTTTTCTCGGGTTTTAT        | AACTCCGACTAACCTCCG            | chr1:145075684-145075799 |
| PLXNC1_1397     | CGAGTCCGGTAATTATCGTTATT    | CCGTCTAACCCGACTATAAAAC        | chr12:94533764-94533877  |
| PRPH_1409       | GATTTGTTGCGAGTTGTTAATCG    | CTCGCAGTTAAACTCTAAATCTAA      | chr12:49690936-49691035  |
| CNR1_1699       | AAATGAACGTTAAGGCGGTTATAA   | CAACCATCGCTCCACC              | chr6:88877266-88877378   |
| ADRB2_1431      | TTTTATCGTTTTGGTTATCGTGTTG  | TAATAACCGTCTACAACGCTCG        | chr5:148206516-148206599 |
| QPCT_1446       | CGTAGTTGTATTTGAGCGGTT      | ATAAAAACGCGGATACCTAAACTAAA    | chr2:37572011-37572131   |
| mir-663_1705    | TTCTGCTGTTTATTGTGGTCG      | CAACCATCGCTCGCTATC            | chr20:26189216-26189327  |
| mir-671_1465    | GAGTTAGAGCGACGGTATTTTG     | CTTCGAAACCAGTCCATAAA          | chr7:150935098-150935194 |
| HIST1H3C_1491   | AATAGTTCGTAAGTTTATCGGCG    | ATACCCGAAACGATAACGATAAAATTT   | chr6:26045655-26045775   |
| ACSS3_1504      | TTTTAGTGGTTTCGGGTTTCG      | ACCGAAACTACGAAATAAATCTTATACTC | chr12:81472005-81472108  |
| KCND2_1525      | TTTTAGTGGTTTCGGGTTTCG      | ACCGAAACTACGAAATAAATCTTATACTC | chr12:81472005-81472108  |
| GNAS_1532       | TCGAATCGGAATTTGATTACGAG    | CTCGATCTCGCTCTCGAT            | chr20:57415399-57415509  |
| COL6A3_1719     | TGTATTTCCGGCCGTTAGT        | ACAAAACGAATCCCGAATAAATTTTAAA  | chr2:238322242-238322326 |
| TRIM36_1727     | TAACCGTGGTATTTTCGAGTG      | AATCGCACACTTCGAACC            | chr5:114515219-114515317 |
| SHOX2_1738      | CGTTCGTTATCGGAGGTTG        | GAAATCGCACGAACACAAAC          | chr3:157821378-157821486 |
| C3orf70_1749    | GTTACCGGATGATTTCGGTT       | CGAATAACACTAACCCACGAAAA       | chr3:184871092-184871212 |
| ANKRD43_1611    | GGTTGTATTGTACGGTTACGAG     | AAAACCGAACCAGCAATACTAATA      | chr5:132150485-132150603 |
| PCDHA6_16211    | TTGGTGTGCGGTTTGTTTA        | CGATCCGAAAATTCACAAACAAAATA    | chr5:140207850-140207947 |
| GRB10_1759      | TTAGTTTACGATAGAGTACGGGG    | ATAAACGAACTATTTAAAACGCACAAAA  | chr7:50861529-50861646   |
| APOE_1643       | CGTTTGGACGAGGTGAAG         | AACCTCGACCTACAAACGTA          | chr19:45412288-45412375  |
| PTGER4_1659     | TGCGTCGATTTTCGTTGG         | GCTAAAACGCGACAAAACATAAA       | chr5:40681747-40681851   |
| RTN1_1765       | TCGAGTTGGATAGCGAGTTTA      | CGCTAAACTTCATCGAAAATAAATCC    | chr14:60193921-60194023  |
| mir-1225_1771   | GTAGTTACGTTTCGTGCGTTA      | CTAAACGTAAACTACCCGAAAC        | chr16:2140686-2140801    |
| mir-3177_1799   | AGTGTAACGTTAGGTAGTGTTC     | AAAACAACGCCTAACACGTAT         | chr16:1784907-1785023    |
| TGFBI_1805      | TCGTTTCGTTTTATGGCGT        | TTAACGAAACCCGCCAAAA           | chr5:135364732-135364824 |
| TGFBI_1809      | TTGTACGGGTCGGTTTATG        | ACGAACAAAACGAAACGACTC         | chr5:135364587-135364707 |

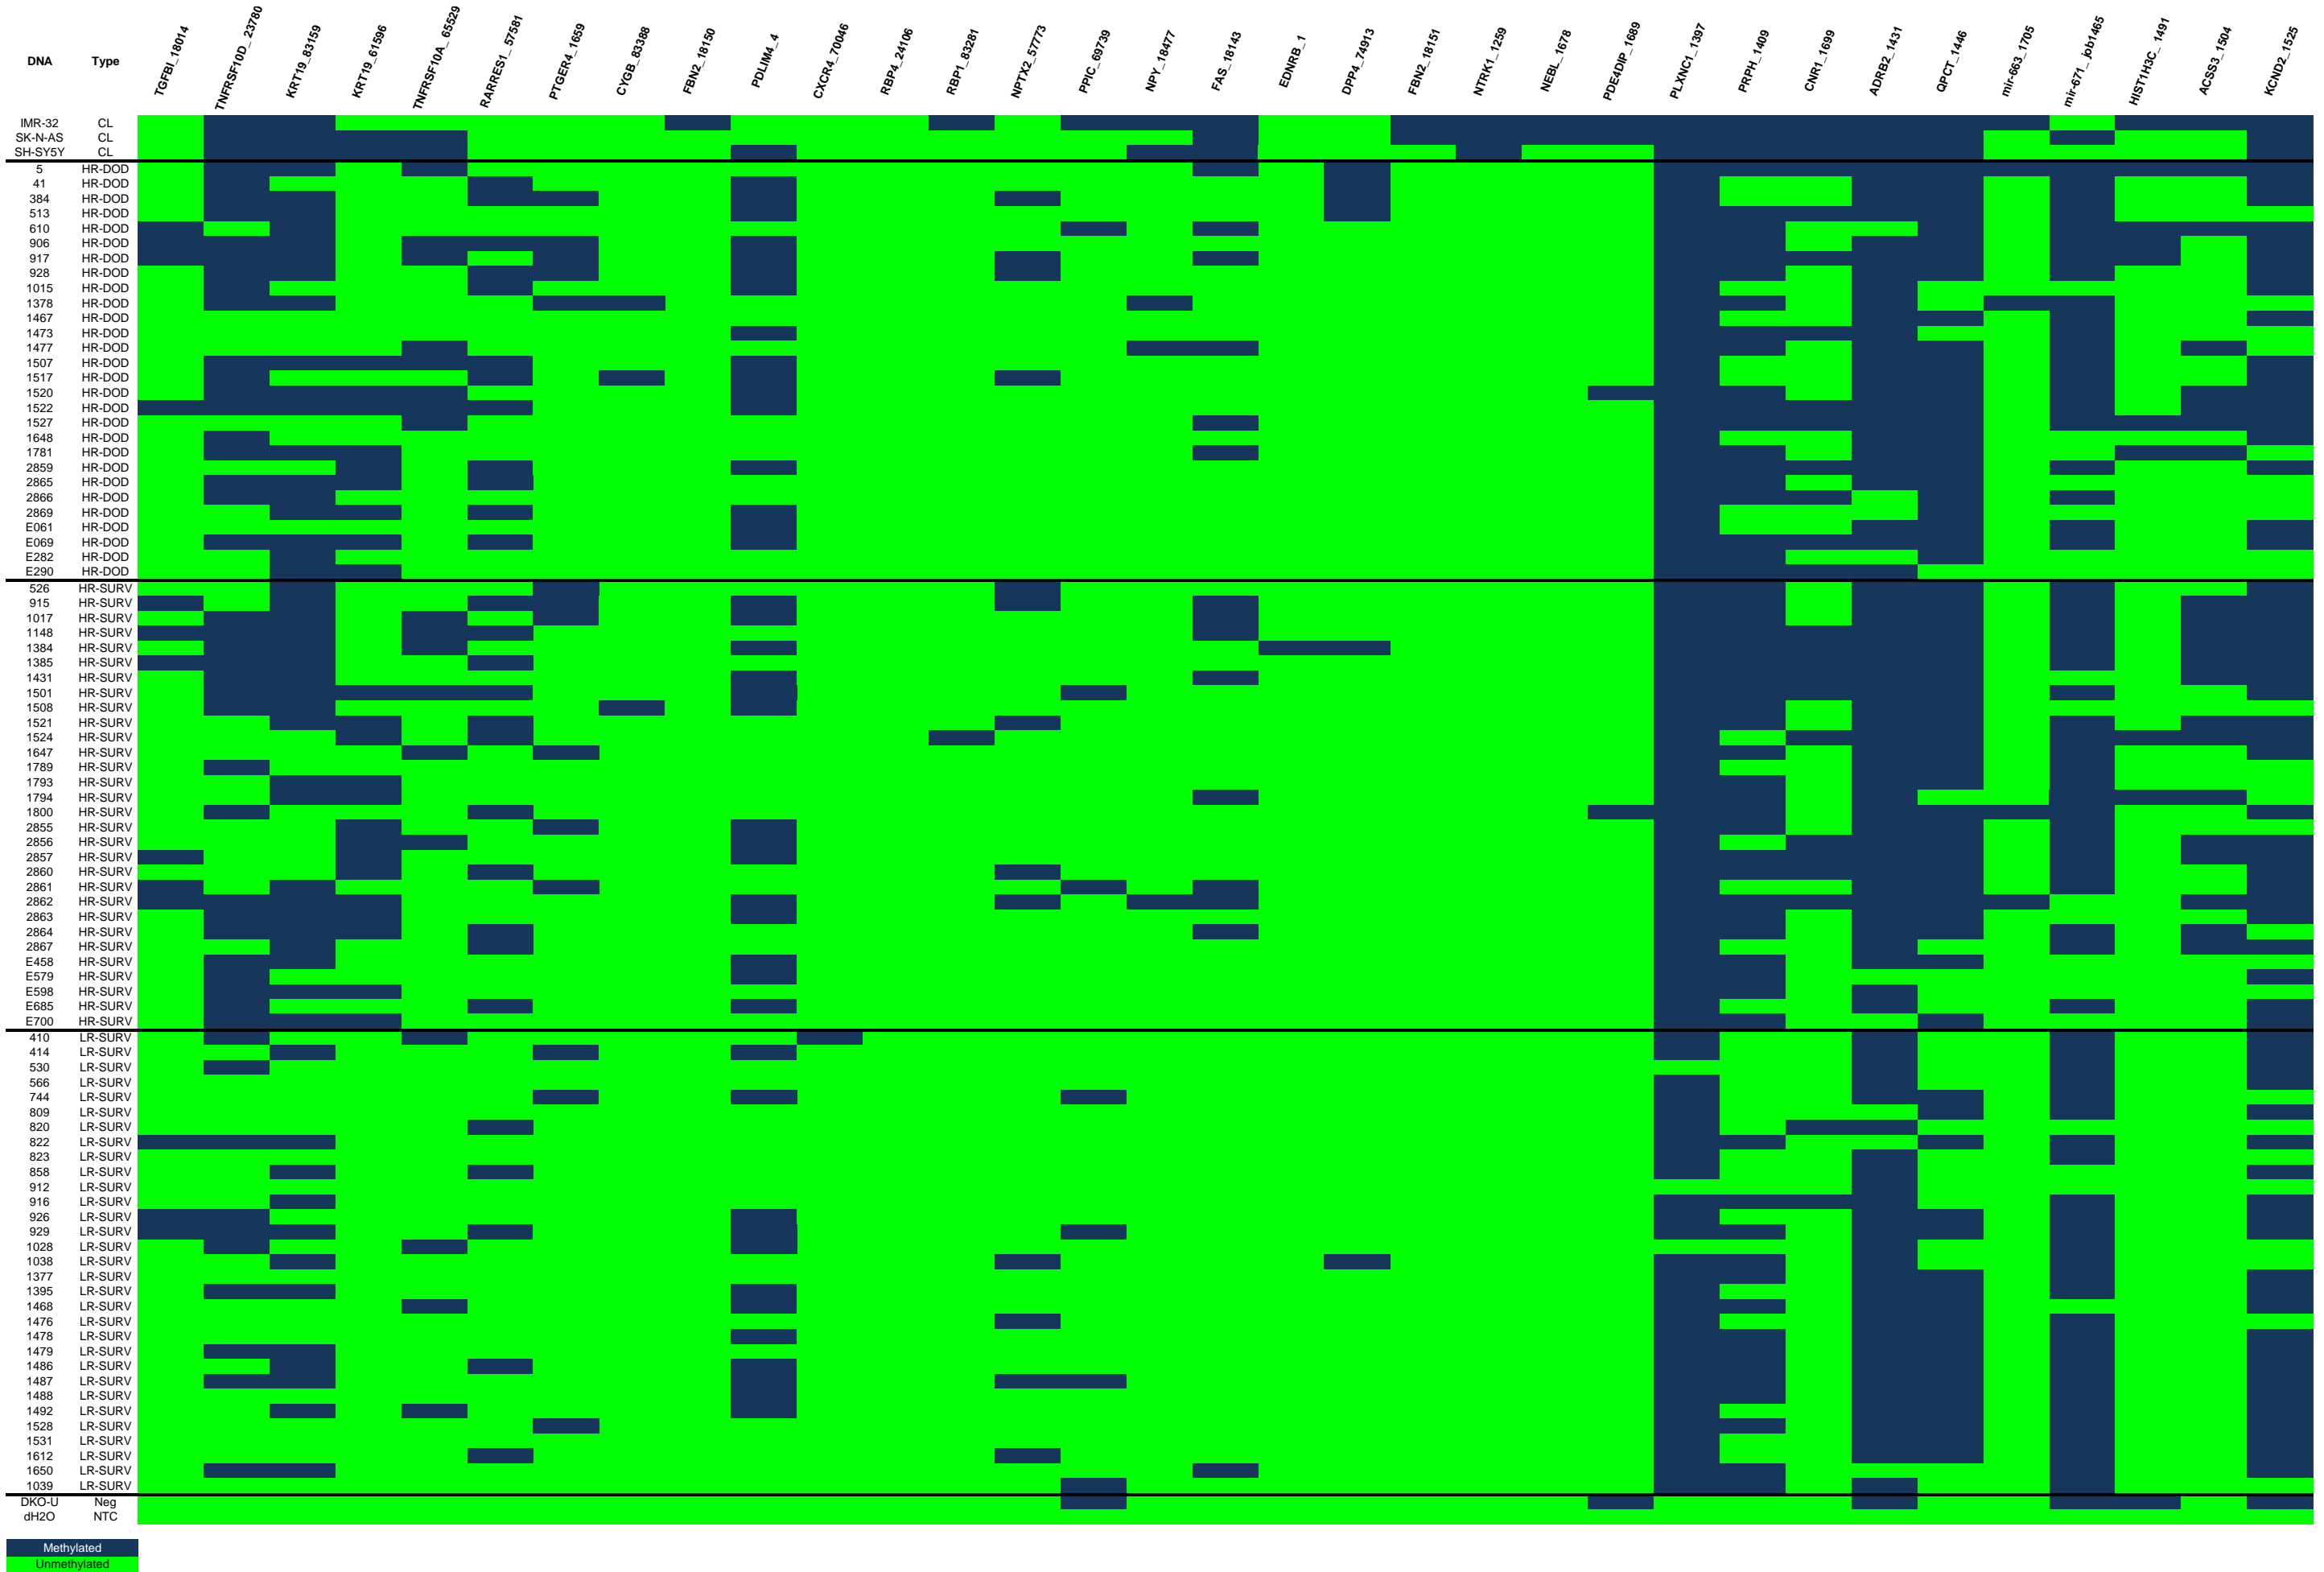

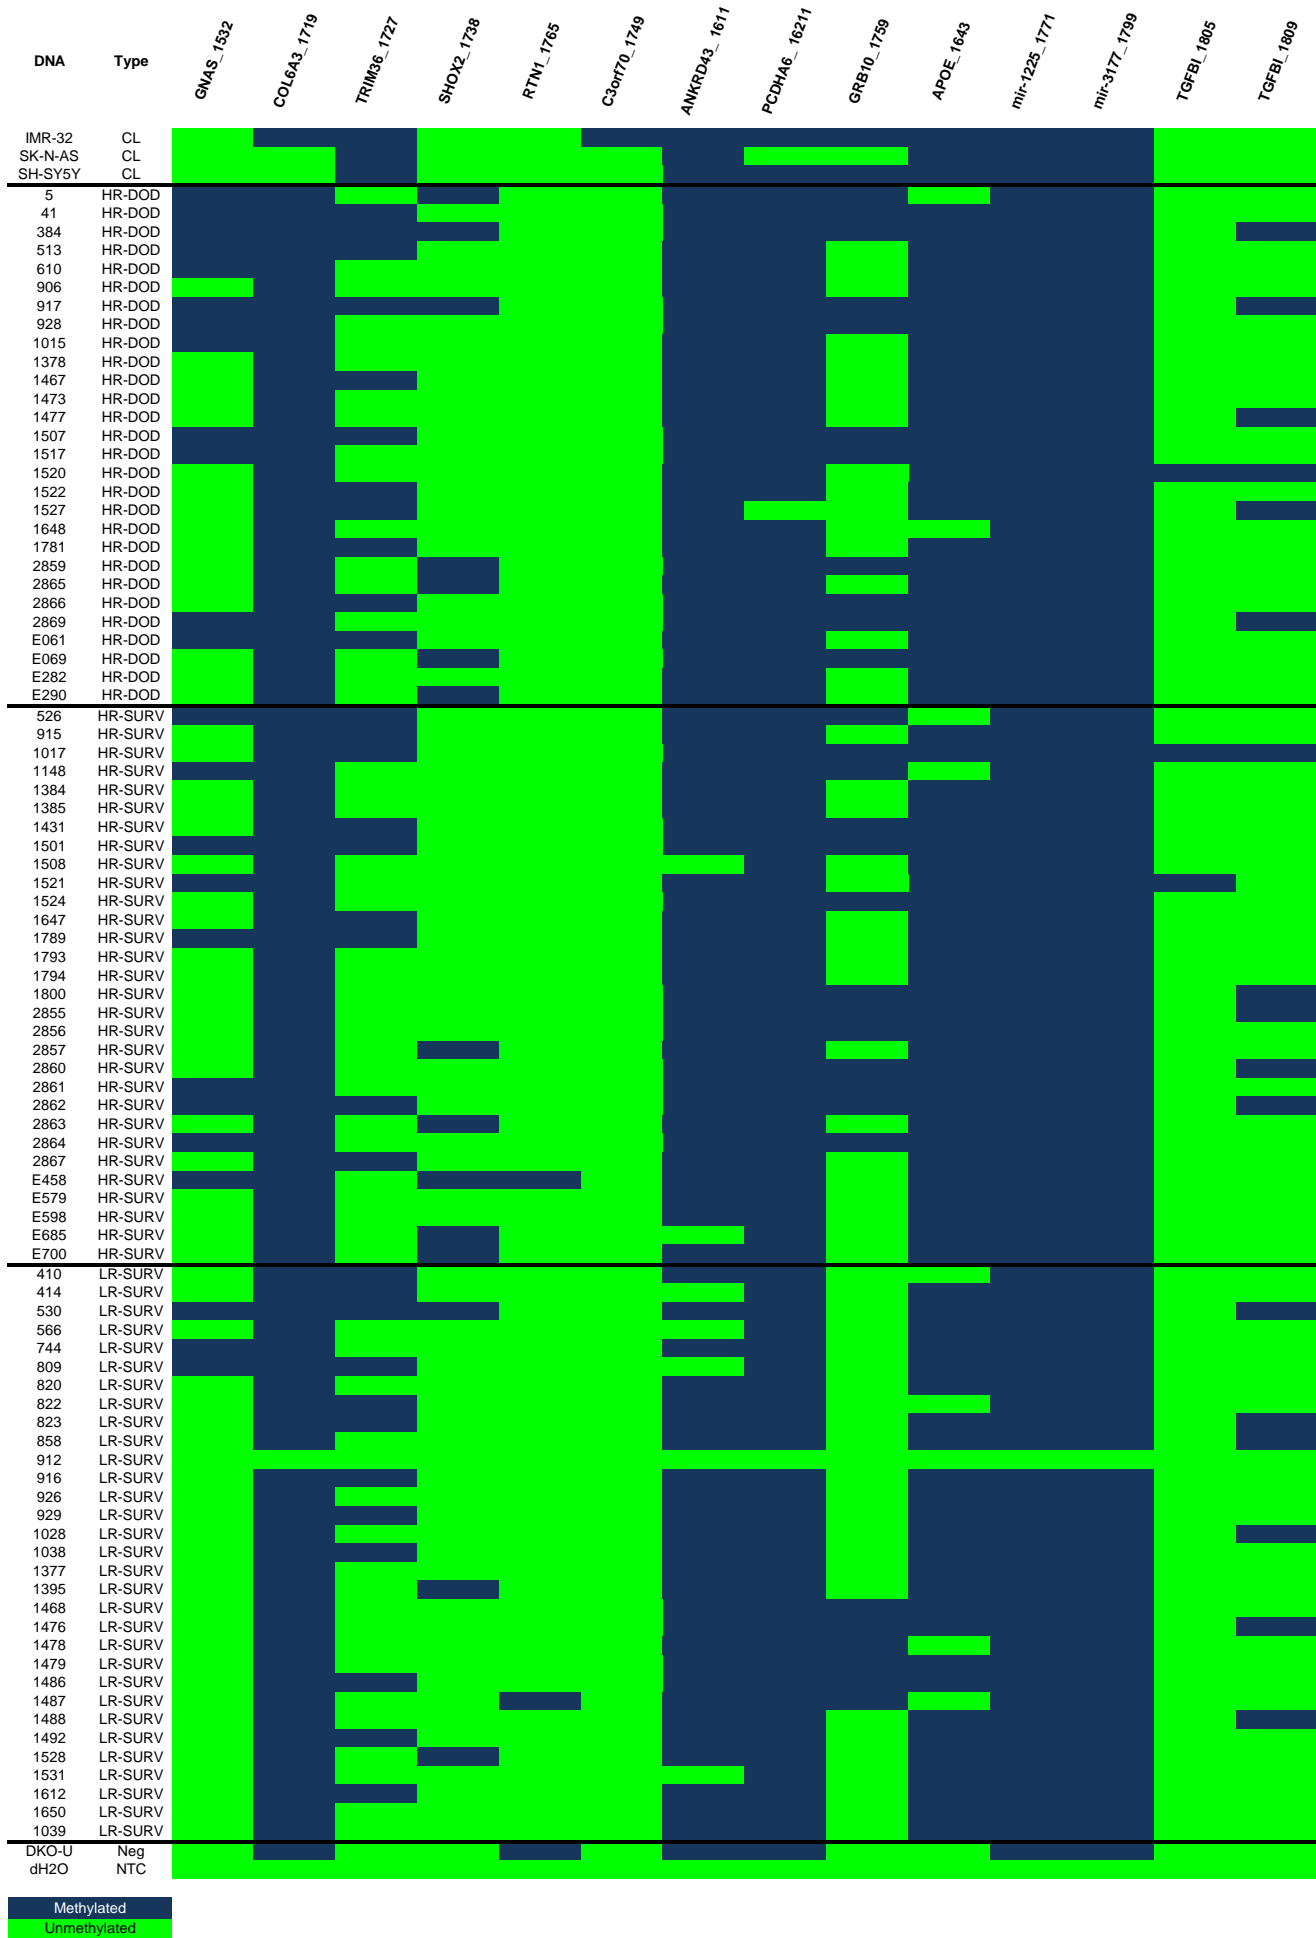

Methylated  
Unmethylated



| Gene                | HR-DOD       | HR-SURV      | LR-SURV     | Overall     |
|---------------------|--------------|--------------|-------------|-------------|
| COL6A3              | 28/28 (100%) | 30/30 (100%) | 30/31 (97%) | 88/89 (99%) |
| miR-1225            | 28/28 (100%) | 30/30 (100%) | 30/31 (97%) | 88/89 (99%) |
| miR-3177            | 28/28 (100%) | 30/30 (100%) | 30/31 (97%) | 88/89 (99%) |
| PCDHA6              | 27/28 (96%)  | 30/30 (100%) | 30/31 (97%) | 87/89 (98%) |
| PLXNC1              | 28/28 (100%) | 30/30 (100%) | 28/31 (90%) | 86/89 (97%) |
| ANKRD43             | 28/28 (100%) | 28/30 (93%)  | 26/31 (84%) | 82/89 (92%) |
| ADRB2               | 24/28 (86%)  | 28/30 (93%)  | 28/31 (90%) | 80/89 (90%) |
| APOE                | 26/28 (93%)  | 28/30 (93%)  | 26/31 (84%) | 80/89 (90%) |
| miR-671             | 21/28 (75%)  | 22/30 (73%)  | 27/31 (87%) | 70/89 (79%) |
| QPCT                | 24/28 (86%)  | 25/30 (83%)  | 18/31 (58%) | 67/89 (75%) |
| KCND2               | 18/28 (64%)  | 22/30 (73%)  | 23/31 (74%) | 63/89 (71%) |
| PRPH                | 19/28 (68%)  | 24/30 (80%)  | 14/31 (45%) | 57/89 (64%) |
| KRT19 (assay 83159) | 18/28 (64%)  | 20/30 (67%)  | 12/31 (39%) | 50/89 (56%) |
| TNFRSF10D           | 18/28 (64%)  | 17/30 (57%)  | 10/31 (32%) | 45/89 (51%) |
| PDLIM4              | 16/28 (57%)  | 14/30 (47%)  | 12/31 (39%) | 42/89 (47%) |
| TRIM36              | 11/28 (39%)  | 9/30 (30%)   | 12/31 (39%) | 32/89 (36%) |
| GRB10               | 11/28 (39%)  | 13/30 (43%)  | 6/31 (19%)  | 30/89 (34%) |
| RARRES1             | 12/28 (43%)  | 11/30 (37%)  | 5/31 (16%)  | 28/89 (31%) |
| GNAS                | 12/28 (43%)  | 9/30 (30%)   | 3/31 (10%)  | 24/89 (27%) |
| KRT19 (assay 61596) | 9/28 (32%)   | 14/30 (47%)  | 0/31 (0%)   | 23/89 (26%) |
| CNR1                | 10/28 (36%)  | 10/30 (33%)  | 2/31 (6%)   | 22/89 (25%) |
| ACSS3               | 7/28 (25%)   | 14/30 (47%)  | 0/31 (0%)   | 21/89 (24%) |
| TNFRSF10A           | 8/28 (29%)   | 6/30 (20%)   | 4/31 (13%)  | 18/89 (20%) |
| TGFBI (assay 1809)  | 6/28 (21%)   | 5/30 (17%)   | 6/31 (19%)  | 17/89 (19%) |
| FAS                 | 6/28 (21%)   | 8/30 (27%)   | 1/31 (3%)   | 15/89 (17%) |
| SHOX2               | 7/28 (25%)   | 5/30 (17%)   | 3/31 (10%)  | 15/89 (17%) |
| PTGER4              | 5/28 (18%)   | 6/30 (20%)   | 3/31 (10%)  | 14/89 (16%) |
| TGFBI (assay 18014) | 4/28 (14%)   | 6/30 (20%)   | 3/31 (10%)  | 13/89 (15%) |
| NPTX2               | 4/28 (14%)   | 5/30 (17%)   | 4/31 (13%)  | 13/89 (15%) |
| HIST1H3C            | 6/28 (21%)   | 2/30 (7%)    | 0/31 (0%)   | 8/89 (9%)   |
| PPIC                | 1/28 (4%)    | 2/30 (7%)    | 4/31 (13%)  | 7/89 (8%)   |
| DPP4                | 4/28 (14%)   | 1/30 (3%)    | 1/31 (3%)   | 6/89 (7%)   |
| miR-663             | 2/28 (7%)    | 2/30 (7%)    | 0/31 (0%)   | 4/89 (4%)   |
| CYGB                | 2/28 (7%)    | 1/30 (3%)    | 0/31 (0%)   | 3/89 (3%)   |
| NPY                 | 2/28 (7%)    | 1/30 (3%)    | 0/31 (0%)   | 3/89 (3%)   |
| TGFBI (assay 1805)  | 1/28 (4%)    | 2/30 (7%)    | 0/31 (0%)   | 3/89 (3%)   |
| PDE4DIP             | 1/28 (4%)    | 1/30 (3%)    | 0/31 (0%)   | 2/89 (2%)   |
| RTN1                | 0/28 (0%)    | 1/30 (3%)    | 1/31 (3%)   | 2/89 (2%)   |
| CXCR4               | 0/28 (0%)    | 0/30 (0%)    | 1/31 (3%)   | 1/89 (1%)   |
| RBP1                | 0/28 (0%)    | 1/30 (3%)    | 0/31 (0%)   | 1/89 (1%)   |
| EDNRB               | 0/28 (0%)    | 1/30 (3%)    | 0/31 (0%)   | 1/89 (1%)   |
| FBN2 (assay 18150)  | 0/28 (0%)    | 0/30 (0%)    | 0/31 (0%)   | 0/89 (0%)   |
| RBP4                | 0/28 (0%)    | 0/30 (0%)    | 0/31 (0%)   | 0/89 (0%)   |
| FBN2 (assay 18151)  | 0/28 (0%)    | 0/30 (0%)    | 0/31 (0%)   | 0/89 (0%)   |
| NTRK1               | 0/28 (0%)    | 0/30 (0%)    | 0/31 (0%)   | 0/89 (0%)   |
| NEBL                | 0/28 (0%)    | 0/30 (0%)    | 0/31 (0%)   | 0/89 (0%)   |
| C3orf70             | 0/28 (0%)    | 0/30 (0%)    | 0/31 (0%)   | 0/89 (0%)   |

| Type                 | Stage | MYCN        | Age at diagnosis | TNFRSF10D          | KRT19              | FAS                | PRPH               | CNR1               | QPCT               | HIST1H3C          | ACSS3              | GNAS               |
|----------------------|-------|-------------|------------------|--------------------|--------------------|--------------------|--------------------|--------------------|--------------------|-------------------|--------------------|--------------------|
| HR-DOD               | 3     | amplified   | > 12 months      | 2/3 (67%)          | 2/3 (67%)          | 0/3 (0%)           | 3/3 (100%)         | 2/3 (67%)          | 3/3 (100%)         | 1/3 (33%)         | 1/3 (33%)          | 0/3 (0%)           |
|                      |       | single copy | > 12 months      | 9/11 (82%)         | 3/11 (27%)         | 0/11 (0%)          | 4/11 (36%)         | 2/11 (18%)         | 9/11 (82%)         | 0/11 (0%)         | 0/11 (0%)          | 6/11 (55%)         |
|                      | 4     | amplified   | > 12 months      | 6/10 (60%)         | 3/10 (30%)         | 6/10 (60%)         | 9/10 (90%)         | 4/10 (40%)         | 10/10 (100%)       | 5/10 (50%)        | 6/10 (60%)         | 5/10 (50%)         |
|                      |       |             | < 12 months      | 1/4 (25%)          | 1/4 (25%)          | 0/4 (0%)           | 3/4 (75%)          | 2/4 (50%)          | 2/4 (50%)          | 0/4 (0%)          | 0/4 (0%)           | 1/4 (25%)          |
| <i>Total HR-DOD</i>  |       |             |                  | <i>18/28 (64%)</i> | <i>9/28 (32%)</i>  | <i>6/28 (21%)</i>  | <i>19/28 (68%)</i> | <i>10/28 (36%)</i> | <i>24/28 (86%)</i> | <i>6/28 (21%)</i> | <i>7/28 (25%)</i>  | <i>12/28 (43%)</i> |
| HR-SURV              | 2     | amplified   | > 12 months      | 1/1 (100%)         | 1/1 (100%)         | 1/1 (100%)         | 1/1 (100%)         | 1/1 (100%)         | 1/1 (100%)         | 0/1 (0%)          | 1/1 (100%)         | 1/1 (100%)         |
|                      |       |             | < 12 months      | 1/2 (50%)          | 0/2 (0%)           | 0/2 (0%)           | 2/2 (100%)         | 0/2 (0%)           | 2/2 (100%)         | 0/2 (0%)          | 0/2 (0%)           | 0/2 (0%)           |
|                      | 3     | amplified   | > 12 months      | 5/13 (39%)         | 7/13 (54%)         | 4/13 (31%)         | 9/13 (69%)         | 7/13 (54%)         | 12/13 (92%)        | 2/13 (15%)        | 8/13 (62%)         | 3/13 (23%)         |
|                      |       |             | > 12 months      | 6/7 (86%)          | 4/7 (57%)          | 1/7 (14%)          | 5/7 (71%)          | 1/7 (14%)          | 3/7 (43%)          | 0/7 (0%)          | 2/7 (29%)          | 2/7 (29%)          |
|                      | 4     | single copy | < 12 months      | 1/1 (100%)         | 0/1 (0%)           | 0/1 (0%)           | 1/1 (100%)         | 0/1 (100%)         | 1/1 (100%)         | 0/1 (0%)          | 0/1 (0%)           | 1/1 (100%)         |
|                      |       |             | > 12 months      | 2/5 (40%)          | 1/5 (20%)          | 2/5 (40%)          | 5/5 (100%)         | 1/5 (20%)          | 5/5 (100%)         | 0/5 (0%)          | 3/5 (60%)          | 2/5 (40%)          |
|                      |       | amplified   | < 12 months      | 1/1 (100%)         | 1/1 (100%)         | 0/1 (0%)           | 1/1 (100%)         | 0/1 (0%)           | 1/1 (100%)         | 0/1 (0%)          | 0/1 (0%)           | 0/1 (0%)           |
| <i>Total HR-SURV</i> |       |             |                  | <i>17/30 (57%)</i> | <i>14/30 (48%)</i> | <i>8/30 (27%)</i>  | <i>24/30 (80%)</i> | <i>10/30 (33%)</i> | <i>25/30 (83%)</i> | <i>2/30 (7%)</i>  | <i>14/30 (47%)</i> | <i>9/30 (30%)</i>  |
| LR-SURV              | 1     | single copy | > 12 months      | 1/1 (100%)         | 0/1 (0%)           | 0/1 (0%)           | 1/1 (100%)         | 0/1 (0%)           | 1/1 (100%)         | 0/1 (0%)          | 0/1 (0%)           | 0/1 (0%)           |
|                      |       |             | < 12 months      | 8/20 (40%)         | 0/20 (0%)          | 0/20 (0%)          | 7/20 (35%)         | 1/20 (5%)          | 12/20 (60%)        | 0/20 (0%)         | 0/20 (0%)          | 2/20 (10%)         |
|                      | 2     | single copy | > 12 months      | 0/2 (0%)           | 0/2 (0%)           | 0/2 (0%)           | 0/2 (0%)           | 0/2 (0%)           | 2/2 (100%)         | 0/2 (0%)          | 0/2 (0%)           | 1/2 (50%)          |
|                      |       |             | < 12 months      | 1/7 (14%)          | 0/7 (0%)           | 1/7 (14%)          | 5/7 (71%)          | 1/7 (14%)          | 3/7 (43%)          | 0/7 (0%)          | 0/7 (0%)           | 0/7 (0%)           |
|                      | 3     | single copy | < 12 months      | 0/1 (0%)           | 0/1 (0%)           | 0/1 (0%)           | 1/1 (100%)         | 0/1 (0%)           | 0/1 (0%)           | 0/1 (0%)          | 0/1 (0%)           | 0/1 (0%)           |
| <i>Total LR-SURV</i> |       |             |                  | <i>10/31 (32%)</i> | <i>0/31 (0%)</i>   | <i>1/31 (3%)</i>   | <i>14/31 (45%)</i> | <i>2/31 (6%)</i>   | <i>18/31 (58%)</i> | <i>0/31 (0%)</i>  | <i>0/31 (0%)</i>   | <i>3/31 (10%)</i>  |
| <b>Overall total</b> |       |             |                  | <b>45/89 (51%)</b> | <b>23/89 (26%)</b> | <b>15/89 (17%)</b> | <b>57/89 (64%)</b> | <b>22/89 (25%)</b> | <b>67/89 (75%)</b> | <b>8/89 (9%)</b>  | <b>21/89 (24%)</b> | <b>24/89 (27%)</b> |

| Type                 | Stage                        | MYCN        | Age at diagnosis | TGFB1              | TNFRSF10D          | KRT19              | TNFRSF10A          | RARRES1            | FAS                | PRPH               | CNR1               | QPCT               | HIST1H3C         | ACSS3              | GNAS               | GRB10              |            |
|----------------------|------------------------------|-------------|------------------|--------------------|--------------------|--------------------|--------------------|--------------------|--------------------|--------------------|--------------------|--------------------|------------------|--------------------|--------------------|--------------------|------------|
| Stage                | 1                            | Single copy | > 12 months      | 1/1 (100%)         | 1/1 (100%)         | 0/1 (0%)           | 0/1 (0%)           | 0/1 (0%)           | 0/1 (0%)           | 1/1 (100%)         | 0/1 (0%)           | 1/1 (100%)         | 0/1 (100%)       | 0/1 (100%)         | 0/1 (0%)           | 0/1 (0%)           |            |
|                      |                              |             | < 12 months      | 2/20 (10%)         | 8/20 (40%)         | 0/20 (0%)          | 3/20 (15%)         | 4/20 (20%)         | 0/20 (0%)          | 7/20 (35%)         | 1/20 (5%)          | 12/20 (60%)        | 0/20 (0%)        | 0/20 (0%)          | 2/20 (10%)         | 4/20 (20%)         |            |
|                      | Stage 1                      |             |                  | 3/21 (14%)         | 9/21 (43%)         | 0/21 (0%)          | 3/21 (14%)         | 4/21 (19%)         | 0/21 (0%)          | 8/21 (38%)         | 1/21 (5%)          | 13/21 (62%)        | 0/21 (0%)        | 0/21 (0%)          | 2/21 (10%)         | 4/21 (19%)         |            |
|                      | 2                            | Single copy | > 12 months      | 0/2 (0%)           | 0/2 (0%)           | 0/2 (0%)           | 0/2 (0%)           | 0/2 (0%)           | 0/2 (0%)           | 0/2 (0%)           | 0/2 (0%)           | 2/2 (100%)         | 0/2 (0%)         | 0/2 (0%)           | 0/2 (0%)           | 1/2 (50%)          | 1/2 (50%)  |
|                      |                              |             | < 12 months      | 0/7 (100%)         | 1/7 (14%)          | 0/7 (0%)           | 1/7 (14%)          | 1/7 (14%)          | 1/7 (14%)          | 5/7 (71%)          | 1/7 (14%)          | 3/7 (43%)          | 0/7 (0%)         | 0/7 (0%)           | 0/7 (0%)           | 1/7 (14%)          |            |
|                      |                              | Amplified   | > 12 months      | 1/1 (100%)         | 1/1 (100%)         | 1/1 (100%)         | 0/1 (0%)           | 0/1 (0%)           | 1/1 (100%)         | 1/1 (100%)         | 1/1 (100%)         | 1/1 (100%)         | 1/1 (100%)       | 0/1 (0%)           | 1/1 (100%)         | 1/1 (100%)         | 1/1 (100%) |
|                      |                              |             | < 12 months      | 0/2 (0%)           | 1/2 (0%)           | 0/2 (0%)           | 1/2 (50%)          | 0/2 (0%)           | 0/2 (0%)           | 2/2 (100%)         | 0/2 (0%)           | 2/2 (100%)         | 0/2 (0%)         | 2/2 (100%)         | 0/2 (0%)           | 0/2 (0%)           | 0/2 (0%)   |
|                      | Stage 2                      |             |                  | 1/12 (8%)          | 3/12 (25%)         | 1/12 (8%)          | 2/12 (17%)         | 1/12 (8%)          | 2/12 (17%)         | 8/12 (67%)         | 2/12 (17%)         | 8/12 (67%)         | 0/12 (0%)        | 1/12 (8%)          | 2/12 (17%)         | 3/12 (25%)         |            |
|                      | 3                            | Single copy | < 12 months      | 0/1 (0%)           | 0/1 (0%)           | 0/1 (0%)           | 0/1 (0%)           | 0/1 (0%)           | 0/1 (0%)           | 0/1 (0%)           | 1/1 (100%)         | 0/1 (0%)           | 0/1 (0%)         | 0/1 (0%)           | 0/1 (0%)           | 0/1 (0%)           | 0/1 (0%)   |
|                      |                              |             | > 12 months      | 6/16 (38%)         | 7/16 (44%)         | 9/16 (56%)         | 6/16 (38%)         | 7/16 (44%)         | 4/16 (25%)         | 12/16 (75%)        | 9/16 (56%)         | 15/16 (94%)        | 3/16 (19%)       | 9/16 (56%)         | 3/16 (19%)         | 8/16 (50%)         |            |
|                      |                              | Stage 3     |                  |                    | 6/17 (35%)         | 7/17 (41%)         | 9/17 (53%)         | 6/17 (35%)         | 7/17 (41%)         | 4/17 (24%)         | 13/17 (77%)        | 9/17 (53%)         | 15/17 (88%)      | 3/17 (18%)         | 9/17 (58%)         | 3/17 (18%)         | 8/17 (47%) |
|                      | 4                            | Single copy | > 12 months      | 0/18 (0%)          | 15/18 (83%)        | 7/18 (39%)         | 1/18 (6%)          | 11/18 (61%)        | 1/18 (6%)          | 9/18 (50%)         | 3/18 (17%)         | 12/18 (67%)        | 0/18 (0%)        | 2/18 (11%)         | 8/18 (44%)         | 8/18 (44%)         |            |
|                      |                              |             | < 12 months      | 0/1 (0%)           | 1/1 (100%)         | 0/1 (0%)           | 0/1 (0%)           | 0/1 (0%)           | 0/1 (0%)           | 1/1 (100%)         | 0/1 (0%)           | 1/1 (100%)         | 0/1 (0%)         | 0/1 (0%)           | 1/1 (100%)         | 0/1 (0%)           |            |
|                      |                              | Amplified   | > 12 months      | 3/15 (20%)         | 8/15 (53%)         | 4/15 (27%)         | 6/15 (40%)         | 4/15 (27%)         | 8/15 (53%)         | 14/15 (93%)        | 5/15 (33%)         | 15/15 (100%)       | 5/15 (33%)       | 9/15 (60%)         | 7/15 (47%)         | 6/15 (40%)         |            |
|                      |                              |             | < 12 months      | 0/5 (0%)           | 2/5 (40%)          | 2/5 (40%)          | 0/5 (0%)           | 1/5 (20%)          | 0/6 (0%)           | 4/5 (80%)          | 2/5 (40%)          | 3/5 (60%)          | 0/5 (0%)         | 0/5 (0%)           | 1/5 (20%)          | 1/5 (20%)          |            |
|                      | Stage 4                      |             |                  | 3/39 (7%)          | 26/39 (67%)        | 13/39 (33%)        | 7/39 (18%)         | 16/39 (41%)        | 9/39 (15%)         | 28/39 (72%)        | 10/39 (26%)        | 31/39 (80%)        | 5/39 (18%)       | 11/39 (28%)        | 17/39 (44%)        | 15/39 (39%)        |            |
| MYCN                 | MYCN single copy             |             |                  | 3/50 (6%)          | 26/50 (52%)        | 7/50 (14%)         | 5/50 (10%)         | 16/50 (32%)        | 2/50 (4%)          | 24/50 (48%)        | 5/50 (10%)         | 31/50 (62%)        | 0/50 (0%)        | 2/50 (4%)          | 12/50 (24%)        | 14/50 (28%)        |            |
|                      | MYCN amplified               |             |                  | 10/39 (26%)        | 19/39 (49%)        | 16/39 (41%)        | 13/39 (33%)        | 12/39 (31%)        | 13/39 (33%)        | 33/39 (85%)        | 17/39 (44%)        | 36/39 (92%)        | 8/39 (21%)       | 19/39 (49%)        | 12/39 (31%)        | 16/39 (41%)        |            |
| Age                  | Age at diagnosis > 12 months |             |                  | 11/53 (21%)        | 32/53 (60%)        | 21/53 (40%)        | 13/53 (25%)        | 22/53 (42%)        | 14/53 (26%)        | 37/53 (69%)        | 18/53 (34%)        | 46/53 (87%)        | 8/53 (15%)       | 21/53 (40%)        | 20/53 (38%)        | 24/53 (45%)        |            |
|                      | Age at diagnosis < 12 months |             |                  | 2/36 (6%)          | 13/36 (36%)        | 2/36 (6%)          | 5/36 (14%)         | 6/36 (17%)         | 1/36 (3%)          | 20/396(56%)        | 4/36 (11%)         | 21/36 (58%)        | 0/36 (0%)        | 0/36 (0%)          | 4/36 (11%)         | 6/36 (17%)         |            |
|                      | Age at diagnosis > 18 months |             |                  | 9/45 (20%)         | 27/45 (60%)        | 20/45 (44%)        | 11/45 (24%)        | 19/45 (42%)        | 13/45 (29%)        | 33/45 (73%)        | 17/45 (38%)        | 40/45 (89%)        | 8/45 (18%)       | 19/45 (49%)        | 18/45 (40%)        | 23/45 (51%)        |            |
|                      | Age at diagnosis < 18 months |             |                  | 4/44 (9%)          | 18/44 (41%)        | 3/44 (7%)          | 7/44 (16%)         | 9/44 (20%)         | 2/44 (5%)          | 24/44 (55%)        | 5/44 (11%)         | 27/44 (61%)        | 0/44 (0%)        | 2/44 (5%)          | 6/44 (14%)         | 7/44 (16%)         |            |
| <b>Overall total</b> |                              |             |                  | <b>13/89 (15%)</b> | <b>45/89 (51%)</b> | <b>23/89 (26%)</b> | <b>18/89 (20%)</b> | <b>28/89 (32%)</b> | <b>15/89 (17%)</b> | <b>57/89 (64%)</b> | <b>22/89 (25%)</b> | <b>67/89 (75%)</b> | <b>8/89 (9%)</b> | <b>21/89 (24%)</b> | <b>24/89 (27%)</b> | <b>30/89 (34%)</b> |            |

■ Methylated  
■ Unmethylated

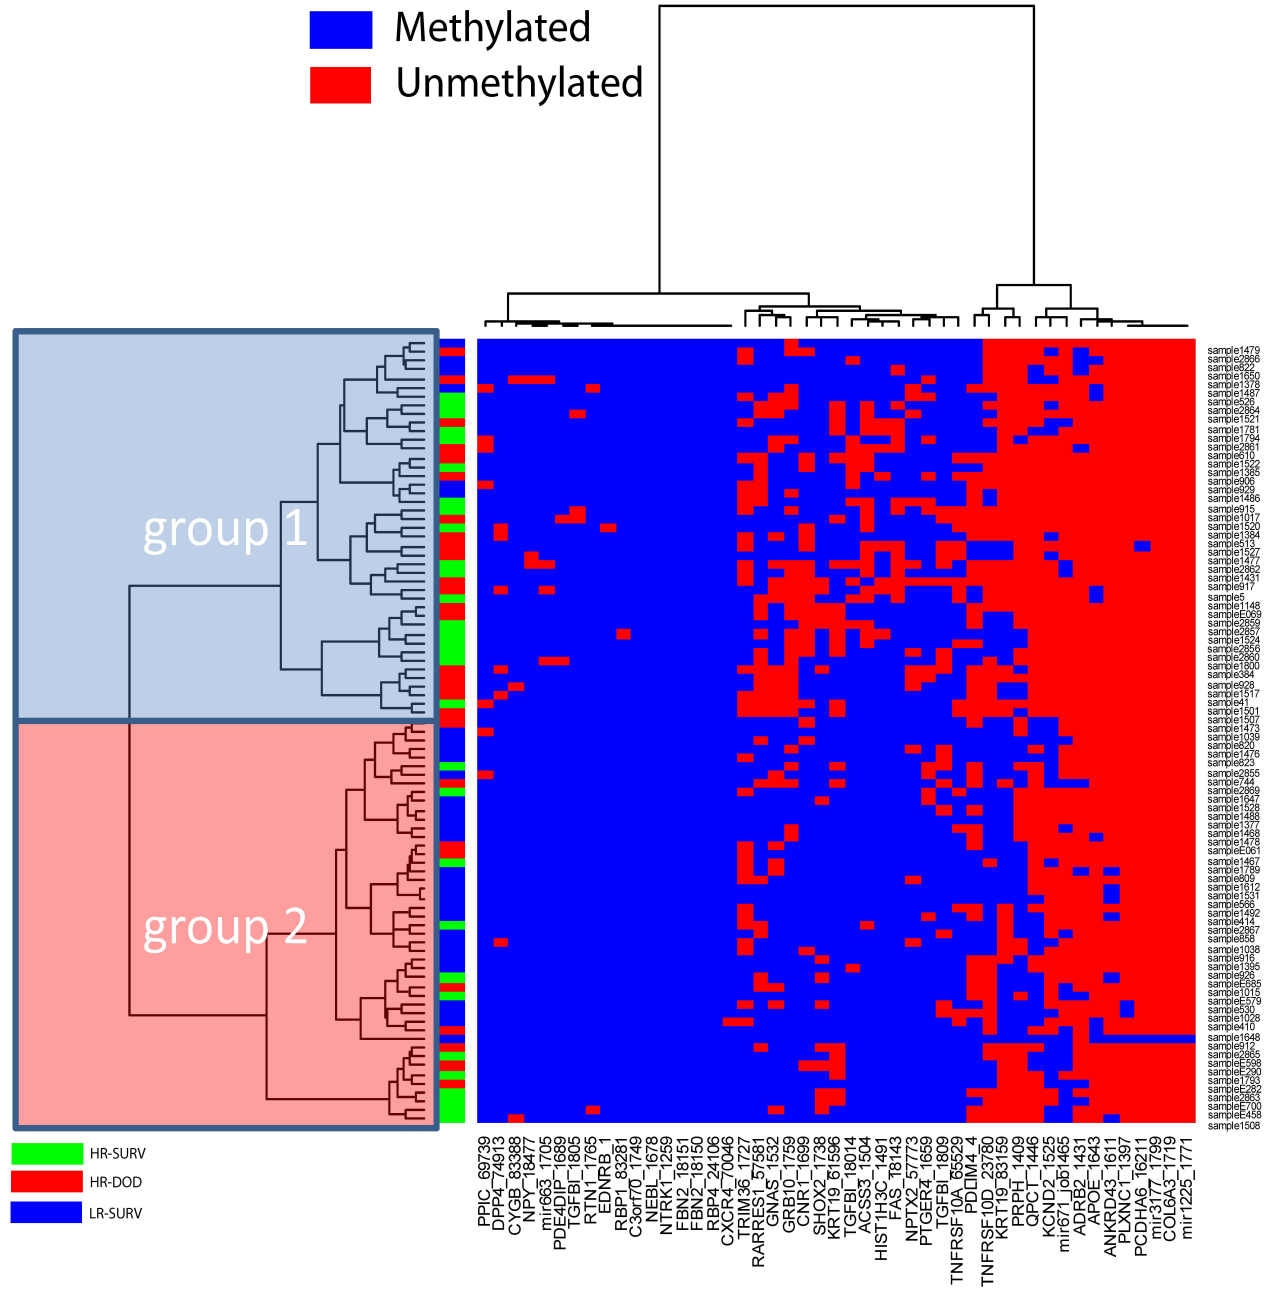

Heatmap

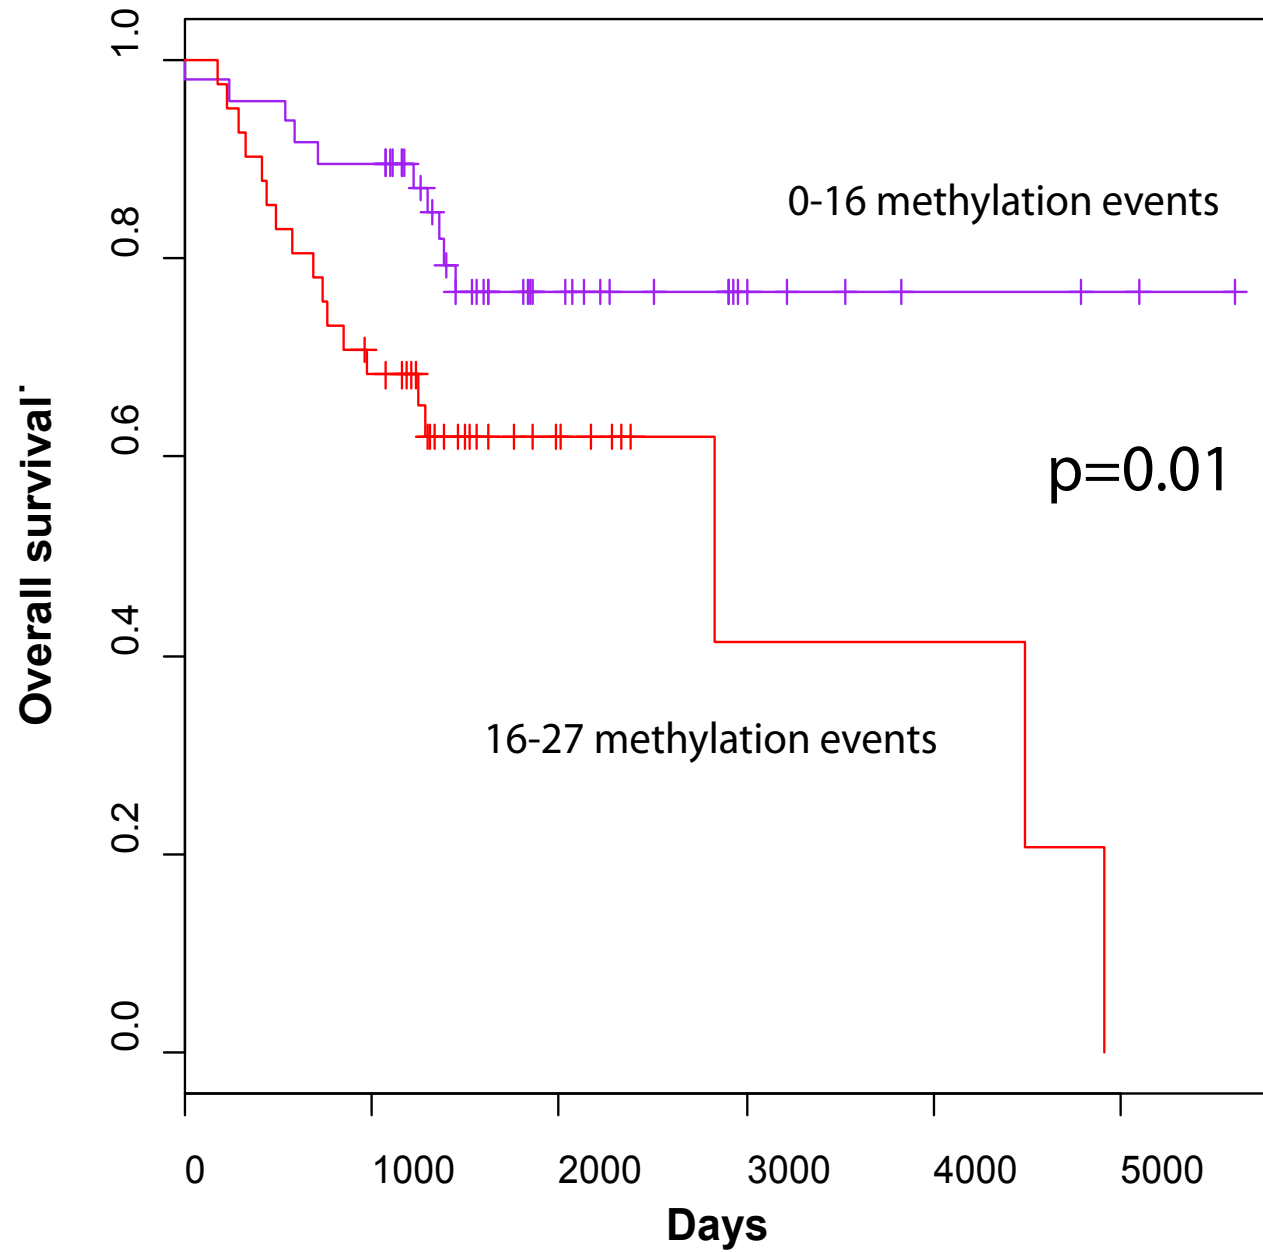

Supplement: gb-2012-13-10-r95-S3.pdf [file gb-2012-13-10-r95-S3.pdf]
