# Supplementary material for: Genome-wide promoter methylation analysis in neuroblastoma identifies prognostic methylation biomarkers
Source: PubMed Central journal article supplement (PMC3491423; doi:10.1186/gb-2012-13-10-r95), 2012-10-03

**Part SIOPEN clinical annotation:** Patient characteristics of the samples of the neuroblastoma SIOPEN/GPOH cDNA library. PatientID is a unique patient number, the group indicates the risk. Clinical characteristics given are the age at diagnosis in months, International Neuroblastoma Staging System (INSS) stage, *MYCN* status (0 is non-amplified/single copy and 1 is amplified), overall survival (OS) and event-free survival (EFS) time in days and months after diagnosis, respectively. OS indicates whether the patient was alive (0) at the last known follow-up or died of disease (1). Similar for EFS, indicating events, such as relapse or progression. Empty cells represent missing values.

**Part SIOPEN overview annotation:** Summary of the clinical characteristics of the 366 primary neuroblastoma samples of the neuroblastoma SIOPEN/GPOH cDNA library. HR-DOD: high-risk deceased patients, HR-SURV: high-risk patients alive for at least 1000 days follow-up, LR-SURV: low-risk patients alive for at least 1000 days follow-up, and INSS: International Neuroblastoma Staging System.

**Part SIOPEN assays:** qPCR mRNA assays used in the mRNA expression profiling of the DNA-methylation biomarkers *CNR1*, *GRB10*, *KRT19*, *PRPH* and *QPCT*. For each tested gene, the assay name and corresponding forward and reverse primer (5' to 3') are indicated, as well as the genomic location of the amplicon on the hg19 reference genome.

**Part SIOPEN results:** Results of the mRNA expression measurement of the DNA-methylation biomarkers *CNR1*, *GRB10*, *KRT19*, *PRPH* and *QPCT*. The Cq values were converted to relative quantities and log<sub>2</sub> values. Relative gene expression levels were then normalized using the geometric mean of five reference sequences (*HPRT1*, *SDHA*, *UBC*,

*HMBS* and *AluSq*). These logged and normalized qPCR data are given. HR-DOD: high-risk deceased patients, HR-SURV: high-risk patients alive for at least 1000 days follow-up and LR-SURV: low-risk patients alive for at least 1000 days follow-up.

**Part Expression:** Relative mRNA expression distribution of *CNRI*, *GRB10*, *KRT19*, *PRPH* and *QPCT* in each of the five different neuroblastoma tumor stages (stage 1, 2, 3, 4 and 4S). In the box plots, the right and left hinge of the boxes represents the 75th percentile and 25th percentile, respectively. Whiskers, lines that extend from the box to the highest and lowest values, indicate the data range. Significant p-values according to the Kruskal-Wallis test (corrected for multiple testing using Benjamini-Hochberg) are indicated.

**Part Survival:** Kaplan-Meier plots: overall survival in the neuroblastoma SIOPEN/GPOH samples according to the relative mRNA expression levels of *CNRI*, *GRB10*, *KRT19*, *PRPH* and *QPCT*. Survival curves indicated with 'High' and 'Low' are the samples assigned to the high and low mRNA expression group, respectively, using the median relative mRNA expression value as a cut-off to create the groups. Significant p-values according to the log-rank test (Mantel-Cox; corrected for multiple testing using Benjamini-Hochberg) are indicated. Time is indicated in days, starting from diagnosis and censored to 4000 days (censored samples are indicated with vertical lines crossing the overall survival curves).

| PatientID | Group   | Age at diagnosis (months) | INSS Stage | MYCN | OS time (days) | EFS time (months) | OS | EFS |
|-----------|---------|---------------------------|------------|------|----------------|-------------------|----|-----|
| 194       | HR-DOD  | 31.496                    | 4          | 0    | 357            | 8.942             | 1  | 1   |
| 1500      | HR-DOD  | 43.660                    | 4          | 0    | 1260           | 23.605            | 1  | 1   |
| 1501      | HR-DOD  | 46.685                    | 4          | 0    | 689            | 11.803            | 1  | 1   |
| 1503      | HR-DOD  | 113.129                   | 4          | 0    | 1517           | 28.110            | 1  | 1   |
| 1716      | HR-DOD  | 69.534                    | 4          | 0    | 877            | 23.934            | 1  | 1   |
| 1852      | HR-DOD  | 53.162                    | 4          | 0    | 1221           | 11.211            | 1  | 1   |
| 2164      | HR-DOD  | 124.537                   | 4          | 0    | 1201           | 34.882            | 1  | 1   |
| 2710      | HR-DOD  | 42.838                    | 4          | 0    | 1235           | 27.156            | 1  | 1   |
| 2711      | HR-DOD  | 85.578                    | 4          | 0    | 890            | 19.101            | 1  | 1   |
| 2712      | HR-DOD  | 110.334                   | 4          | 0    | 100            | 3.288             | 1  | 0   |
| 2714      | HR-DOD  | 56.647                    | 4          | 0    | 1263           | 22.619            | 1  | 1   |
| 2719      | HR-DOD  | 23.704                    | 4          | 0    | 319            | 3.222             | 1  | 1   |
| 2752      | HR-DOD  | 54.707                    | 4          | 0    | 1785           | 23.704            | 1  | 1   |
| 2771      | HR-DOD  | 70.356                    | 4          | 0    | 1333           | 33.271            | 1  | 1   |
| 2772      | HR-DOD  | 142.488                   | 4          | 0    | 861            | 16.077            | 1  | 1   |
| 2775      | HR-DOD  | 75.584                    | 4          | 0    | 1446           | 36.033            | 1  | 1   |
| 2780      | HR-DOD  | 45.238                    | 4          | 0    | 1149           | 20.121            | 1  | 1   |
| 2788      | HR-DOD  | 37.348                    | 4          | 0    | 670            | 18.608            | 1  | 1   |
| 1536      | HR-DOD  | 19.759                    | 2          | 1    | 316            | 9.370             | 1  | 1   |
| 1822      | HR-DOD  | 22.619                    | 3          | 1    | 728            | 19.529            | 1  | 1   |
| 1908      | HR-DOD  | 11.868                    | 3          | 1    | 292            | 6.641             | 1  | 1   |
| 2090      | HR-DOD  | 36.855                    | 3          | 1    | 274            | 8.416             | 1  | 1   |
| 111       | HR-DOD  | 46.455                    | 4          | 1    | 268            | 8.351             | 1  | 1   |
| 127       | HR-DOD  | 11.737                    | 4          | 1    | 412            | 9.403             | 1  | 1   |
| 772       | HR-DOD  | 91.595                    | 4          | 1    | 485            | 14.433            | 1  | 1   |
| 939       | HR-DOD  | 19.299                    | 4          | 1    | 516            | 16.208            | 1  | 1   |
| 1231      | HR-DOD  | 35.803                    | 4          | 1    | 544            | 15.616            | 1  | 1   |
| 1496      | HR-DOD  | 16.142                    | 4          | 1    | 386            | 11.605            | 1  | 1   |
| 1498      | HR-DOD  | 39.288                    | 4          | 1    | 309            | 7.332             | 1  | 1   |
| 1499      | HR-DOD  | 73.381                    | 4          | 1    | 172            | 5.326             | 1  | 1   |
| 1515      | HR-DOD  | 33.797                    | 4          | 1    | 549            | 10.126            | 1  | 1   |
| 1758      | HR-DOD  | 21.764                    | 4          | 1    | 264            | 5.129             | 1  | 1   |
| 1776      | HR-DOD  | 0.000                     | 4          | 1    | 1              | 0.033             | 1  | 1   |
| 1784      | HR-DOD  | 7.529                     | 4          | 1    | 239            | 3.814             | 1  | 1   |
| 1788      | HR-DOD  | 78.707                    | 4          | 1    | 1246           | 29.523            | 1  | 1   |
| 1820      | HR-DOD  | 39.748                    | 4          | 1    | 1279           | 18.148            | 1  | 1   |
| 1827      | HR-DOD  | 107.934                   | 4          | 1    | 319            | 1                 | 1  | 1   |
| 1924      | HR-DOD  | 27.551                    | 4          | 1    | 340            | 10.784            | 1  | 1   |
| 1936      | HR-DOD  | 54.871                    | 4          | 1    | 679            | 21.534            | 1  | 1   |
| 2015      | HR-DOD  | 41.392                    | 4          | 1    | 663            | 19.660            | 1  | 1   |
| 2659      | HR-DOD  | 23.605                    | 4          | 1    | 201            | 6.378             | 1  | 1   |
| 2709      | HR-DOD  | 32.121                    | 4          | 1    | 290            | 8.416             | 1  | 1   |
| 2768      | HR-DOD  | 13.315                    | 4          | 1    | 294            | 9.600             | 1  | 1   |
| 2784      | HR-DOD  | 13.381                    | 4          | 1    | 226            | 4.340             | 1  | 1   |
| 2769      | HR-DOD  | 41.293                    | 4          |      | 499            | 12.395            | 1  | 1   |
| 2777      | HR-DOD  | 58.849                    | 4          |      | 1350           | 26.959            | 1  | 1   |
| 1497      | HR-SURV | 14.992                    | 4          | 0    | 1628           | 53.523            | 0  | 0   |
| 1517      | HR-SURV | 49.644                    | 4          | 0    | 1067           | 24.658            | 0  | 1   |
| 1677      | HR-SURV | 70.093                    | 4          | 0    | 1114           | 36.625            | 0  | 0   |
| 1829      | HR-SURV | 34.192                    | 4          | 0    | 2132           | 24.986            | 0  | 1   |
| 2016      | HR-SURV | 54.904                    | 4          | 0    | 1569           | 32.153            | 0  | 1   |
| 2017      | HR-SURV | 54.904                    | 4          | 0    | 1569           | 32.153            | 0  | 1   |
| 2092      | HR-SURV | 106.323                   | 4          | 0    | 1267           | 35.244            | 0  | 1   |
| 2093      | HR-SURV | 28.438                    | 4          | 0    | 1091           | 35.868            | 0  | 0   |
| 2171      | HR-SURV | 40.701                    | 4          | 0    | 1218           | 40.044            | 0  | 0   |
| 2172      | HR-SURV | 23.079                    | 4          | 0    | 1317           | 43.299            | 0  | 0   |
| 2718      | HR-SURV | 15.222                    | 4          | 0    | 1913           | 62.893            | 0  | 0   |
| 2758      | HR-SURV | 38.203                    | 4          | 0    | 1691           | 55.595            | 0  | 0   |
| 2762      | HR-SURV | 15.353                    | 4          | 0    | 1641           | 53.951            | 0  | 0   |
| 2776      | HR-SURV | 80.614                    | 4          | 0    | 1071           | 35.211            | 0  | 0   |
| 2781      | HR-SURV | 35.079                    | 4          | 0    | 1161           | 29.195            | 0  | 1   |
| 1540      | HR-SURV | 18.707                    | 2          | 1    | 2175           | 71.507            | 0  | 0   |
| 1766      | HR-SURV | 9.008                     | 2          | 1    | 3153           | 103.660           | 0  | 0   |
| 1815      | HR-SURV | 5.655                     | 2          | 1    | 1449           | 47.638            | 0  | 0   |

| PatientID | Group   | Age at diagnosis (months) | INSS Stage | MYCN | OS time (days) | EFS time (months) | OS | EFS |
|-----------|---------|---------------------------|------------|------|----------------|-------------------|----|-----|
| 2162      | HR-SURV | 2.104                     | 2          | 1    | 1837           | 60.395            | 0  | 0   |
| 1686      | HR-SURV | 16.373                    | 3          | 1    | 1046           | 34.389            | 0  | 0   |
| 1824      | HR-SURV | 23.310                    | 3          | 1    | 2387           | 78.477            | 0  | 0   |
| 2770      | HR-SURV | 26.170                    | 3          | 1    | 2137           | 70.258            | 0  | 0   |
| 1759      | HR-SURV | 25.874                    | 4          | 1    | 1953           | 64.208            | 0  | 0   |
| 1821      | HR-SURV | 38.038                    | 4          | 1    | 2163           | 71.112            | 0  | 0   |
| 1823      | HR-SURV | 15.945                    | 4          | 1    | 1985           | 65.260            | 0  | 0   |
| 1853      | HR-SURV | 8.745                     | 4          | 1    | 2174           | 71.474            | 0  | 0   |
| 2091      | HR-SURV | 19.660                    | 4          | 1    | 1320           | 43.397            | 0  | 0   |
| 2530      | HR-SURV | 26.433                    | 4          | 1    | 2009           | 66.049            | 0  | 0   |
| 1542      | HR-SURV | 42.970                    | 3          | 1    | 1807           | 59.408            | 0  | 0   |
| 116       | LR-SURV | 5.688                     | 1          | 0    | 2575           | 84.658            | 0  | 0   |
| 126       | LR-SURV | 3.551                     | 1          | 0    | 2693           | 88.537            | 0  | 0   |
| 130       | LR-SURV | 14.532                    | 1          | 0    | 3404           | 111.912           | 0  | 0   |
| 266       | LR-SURV | 1.545                     | 1          | 0    | 2216           | 72.855            | 0  | 0   |
| 315       | LR-SURV | 1.677                     | 1          | 0    | 2910           | 95.671            | 0  | 0   |
| 320       | LR-SURV | 2.959                     | 1          | 0    | 2951           | 97.019            | 0  | 0   |
| 321       | LR-SURV | 5.227                     | 1          | 0    | 2938           | 96.592            | 0  | 0   |
| 338       | LR-SURV | 0.164                     | 1          | 0    | 2904           | 95.474            | 0  | 0   |
| 346       | LR-SURV | 7.989                     | 1          | 0    | 2302           | 75.682            | 0  | 0   |
| 769       | LR-SURV | 1.249                     | 1          | 0    | 1562           | 51.353            | 0  | 0   |
| 824       | LR-SURV | 0.921                     | 1          | 0    | 2735           | 89.918            | 0  | 0   |
| 827       | LR-SURV | 2.959                     | 1          | 0    | 2732           | 89.819            | 0  | 0   |
| 1538      | LR-SURV | 15.485                    | 1          | 0    | 2172           | 71.408            | 0  | 0   |
| 1539      | LR-SURV | 0.000                     | 1          | 0    | 3922           | 128.942           | 0  | 0   |
| 1541      | LR-SURV | 14.827                    | 1          | 0    | 1797           | 59.079            | 0  | 0   |
| 1693      | LR-SURV | 14.000                    | 1          | 0    | 2372           | 79.067            | 0  | 0   |
| 1694      | LR-SURV | 15.600                    | 1          | 0    | 2908           | 96.933            | 0  | 0   |
| 1698      | LR-SURV | 16.467                    | 1          | 0    | 3303           | 110.100           | 0  | 0   |
| 1699      | LR-SURV | 3.367                     | 1          | 0    | 2367           | 5.600             | 0  | 1   |
| 1700      | LR-SURV | 8.733                     | 1          | 0    | 2416           | 1.100             | 0  | 1   |
| 1701      | LR-SURV | 25.267                    | 1          | 0    | 1063           | 12.100            | 0  | 1   |
| 1720      | LR-SURV | 1.052                     | 1          | 0    | 2027           | 66.641            | 0  | 0   |
| 1752      | LR-SURV | 33.008                    | 1          | 0    | 1482           | 48.723            | 0  | 0   |
| 1767      | LR-SURV | 13.841                    | 1          | 0    | 3930           | 129.205           | 0  | 0   |
| 1789      | LR-SURV | 1.479                     | 1          | 0    | 1066           | 35.047            | 0  | 0   |
| 1790      | LR-SURV | 3.222                     | 1          | 0    | 1156           | 38.005            | 0  | 0   |
| 1798      | LR-SURV | 11.507                    | 1          | 0    | 2328           | 76.537            | 0  | 0   |
| 1799      | LR-SURV | 7.101                     | 1          | 0    | 1463           | 48.099            | 0  | 0   |
| 1804      | LR-SURV | 0.296                     | 1          | 0    | 1316           | 43.266            | 0  | 0   |
| 1828      | LR-SURV | 9.567                     | 1          | 0    | 1622           | 53.326            | 0  | 0   |
| 1831      | LR-SURV | 2.137                     | 1          | 0    | 1593           | 52.373            | 0  | 0   |
| 1841      | LR-SURV | 6.312                     | 1          | 0    | 2271           | 74.663            | 0  | 0   |
| 1857      | LR-SURV | 7.397                     | 1          | 0    | 1744           | 57.337            | 0  | 0   |
| 1879      | LR-SURV | 75.682                    | 1          | 0    | 3050           | 100.274           | 0  | 0   |
| 1882      | LR-SURV | 14.827                    | 1          | 0    | 4532           | 66.542            | 0  | 1   |
| 1883      | LR-SURV | 2.071                     | 1          | 0    | 3436           | 112.964           | 0  | 0   |
| 1886      | LR-SURV | 4.142                     | 1          | 0    | 2774           | 91.200            | 0  | 0   |
| 1891      | LR-SURV | 24.263                    | 1          | 0    | 2593           | 85.249            | 0  | 0   |
| 1892      | LR-SURV | 60.690                    | 1          | 0    | 3703           | 121.742           | 0  | 0   |
| 1893      | LR-SURV | 18.542                    | 1          | 0    | 3173           | 104.318           | 0  | 0   |
| 1896      | LR-SURV | 32.910                    | 1          | 0    | 3398           | 111.715           | 0  | 0   |
| 1898      | LR-SURV | 53.622                    | 1          | 0    | 2478           | 81.468            | 0  | 0   |
| 1899      | LR-SURV | 2.005                     | 1          | 0    | 2126           | 69.896            | 0  | 0   |
| 1901      | LR-SURV | 4.603                     | 1          | 0    | 2931           | 96.362            | 0  | 0   |
| 1905      | LR-SURV | 1.184                     | 1          | 0    | 3196           | 105.074           | 0  | 0   |
| 1906      | LR-SURV | 15.748                    | 1          | 0    | 2022           | 66.477            | 0  | 0   |
| 1907      | LR-SURV | 25.545                    | 1          | 0    | 1992           | 65.490            | 0  | 0   |
| 1909      | LR-SURV | 0.000                     | 1          | 0    | 2320           | 76.274            | 0  | 0   |
| 1912      | LR-SURV | 2.170                     | 1          | 0    | 2543           | 83.605            | 0  | 0   |
| 1914      | LR-SURV | 67.923                    | 1          | 0    | 2481           | 81.567            | 0  | 0   |
| 1915      | LR-SURV | 25.611                    | 1          | 0    | 2966           | 18.411            | 0  | 1   |
| 1916      | LR-SURV | 1.118                     | 1          | 0    | 1675           | 55.068            | 0  | 0   |
| 1917      | LR-SURV | 4.471                     | 1          | 0    | 2762           | 90.805            | 0  | 0   |

| PatientID | Group   | Age at diagnosis (months) | INSS Stage | MYCN | OS time (days) | EFS time (months) | OS | EFS |
|-----------|---------|---------------------------|------------|------|----------------|-------------------|----|-----|
| 1918      | LR-SURV | 78.115                    | 1          | 0    | 2432           | 79.956            | 0  | 0   |
| 1919      | LR-SURV | 60.164                    | 1          | 0    | 1618           | 53.195            | 0  | 0   |
| 1920      | LR-SURV | 45.863                    | 1          | 0    | 2721           | 89.458            | 0  | 0   |
| 1929      | LR-SURV | 4.603                     | 1          | 0    | 1100           | 36.164            | 0  | 0   |
| 1939      | LR-SURV | 16.567                    | 1          | 0    | 2194           | 73.133            | 0  | 0   |
| 1940      | LR-SURV | 16.533                    | 1          | 0    | 2101           | 70.033            | 0  | 0   |
| 1941      | LR-SURV | 18.200                    | 1          | 0    | 2639           | 87.967            | 0  | 0   |
| 1942      | LR-SURV | 15.600                    | 1          | 0    | 2908           | 96.933            | 0  | 0   |
| 1943      | LR-SURV | 15.433                    | 1          | 0    | 1372           | 45.733            | 0  | 0   |
| 1950      | LR-SURV | 13.367                    | 1          | 0    | 3802           | 126.733           | 0  | 0   |
| 1959      | LR-SURV | 33.867                    | 1          | 0    | 5019           | 167.300           | 0  | 0   |
| 1961      | LR-SURV | 4.400                     | 1          | 0    | 4401           | 3.500             | 0  | 1   |
| 1964      | LR-SURV | 15.500                    | 1          | 0    | 2317           | 77.233            | 0  | 0   |
| 1965      | LR-SURV | 14.667                    | 1          | 0    | 3031           | 101.033           | 0  | 0   |
| 1968      | LR-SURV | 1.167                     | 1          | 0    | 1685           | 56.167            | 0  | 0   |
| 2025      | LR-SURV | 13.414                    | 1          | 0    | 2413           | 79.332            | 0  | 0   |
| 2071      | LR-SURV | 10.784                    | 1          | 0    | 2566           | 84.362            | 0  | 0   |
| 2088      | LR-SURV | 1.085                     | 1          | 0    | 1341           | 44.088            | 0  | 0   |
| 2099      | LR-SURV | 1.644                     | 1          | 0    | 3926           | 129.074           | 0  | 0   |
| 2100      | LR-SURV | 162.740                   | 1          | 0    | 2501           | 82.225            | 0  | 0   |
| 2101      | LR-SURV | 81.205                    | 1          | 0    | 3590           | 118.027           | 0  | 0   |
| 2105      | LR-SURV | 39.649                    | 1          | 0    | 2872           | 94.422            | 0  | 0   |
| 2106      | LR-SURV | 12.822                    | 1          | 0    | 2806           | 92.252            | 0  | 0   |
| 2107      | LR-SURV | 1.841                     | 1          | 0    | 3070           | 100.932           | 0  | 0   |
| 2108      | LR-SURV | 4.044                     | 1          | 0    | 1803           | 59.277            | 0  | 0   |
| 2110      | LR-SURV | 6.970                     | 1          | 0    | 2630           | 86.466            | 0  | 0   |
| 2119      | LR-SURV | 0.099                     | 1          | 0    | 2270           | 74.630            | 0  | 0   |
| 2122      | LR-SURV | 2.038                     | 1          | 0    | 1826           | 60.033            | 0  | 0   |
| 2161      | LR-SURV | 3.222                     | 1          | 0    | 1826           | 60.033            | 0  | 0   |
| 2163      | LR-SURV | 3.781                     | 1          | 0    | 1674           | 13.841            | 0  | 1   |
| 2165      | LR-SURV | 1.151                     | 1          | 0    | 1567           | 51.518            | 0  | 0   |
| 2167      | LR-SURV | 2.137                     | 1          | 0    | 1481           | 48.690            | 0  | 0   |
| 2169      | LR-SURV | 0.559                     | 1          | 0    | 1461           | 48.033            | 0  | 0   |
| 2170      | LR-SURV | 1.742                     | 1          | 0    | 1461           | 48.033            | 0  | 0   |
| 2253      | LR-SURV | 53.589                    | 1          | 0    | 3860           | 126.904           | 0  | 0   |
| 2257      | LR-SURV | 0.427                     | 1          | 0    | 1930           | 63.452            | 0  | 0   |
| 2753      | LR-SURV | 1.052                     | 1          | 0    | 4483           | 9.732             | 0  | 1   |
| 2756      | LR-SURV | 0.296                     | 1          | 0    | 3493           | 3.419             | 0  | 1   |
| 2794      | LR-SURV | 1.479                     | 1          | 0    | 2780           | 3.123             | 0  | 1   |
| 2795      | LR-SURV | 0.921                     | 1          | 0    | 2231           | 2.696             | 0  | 1   |
| 192       | LR-SURV | 1.447                     | 2          | 0    | 1053           | 34.619            | 0  | 0   |
| 332       | LR-SURV | 3.156                     | 2          | 0    | 2942           | 96.723            | 0  | 0   |
| 1535      | LR-SURV | 3.814                     | 2          | 0    | 2613           | 85.907            | 0  | 0   |
| 1672      | LR-SURV | 2.532                     | 2          | 0    | 2511           | 82.553            | 0  | 0   |
| 1695      | LR-SURV | 13.800                    | 2          | 0    | 2094           | 69.800            | 0  | 0   |
| 1696      | LR-SURV | 32.500                    | 2          | 0    | 2780           | 92.667            | 0  | 0   |
| 1697      | LR-SURV | 13.900                    | 2          | 0    | 3344           | 111.467           | 0  | 0   |
| 1753      | LR-SURV | 19.200                    | 2          | 0    | 3479           | 114.378           | 0  | 0   |
| 1754      | LR-SURV | 7.364                     | 2          | 0    | 3117           | 102.477           | 0  | 0   |
| 1755      | LR-SURV | 2.827                     | 2          | 0    | 1915           | 62.959            | 0  | 0   |
| 1756      | LR-SURV | 10.619                    | 2          | 0    | 1532           | 50.367            | 0  | 0   |
| 1757      | LR-SURV | 33.929                    | 2          | 0    | 2557           | 84.066            | 0  | 0   |
| 1762      | LR-SURV | 54.773                    | 2          | 0    | 2107           | 69.271            | 0  | 0   |
| 1763      | LR-SURV | 37.479                    | 2          | 0    | 1325           | 43.562            | 0  | 0   |
| 1764      | LR-SURV | 0.789                     | 2          | 0    | 1470           | 48.329            | 0  | 0   |
| 1769      | LR-SURV | 6.148                     | 2          | 0    | 2163           | 71.112            | 0  | 0   |
| 1770      | LR-SURV | 5.392                     | 2          | 0    | 1737           | 57.107            | 0  | 0   |
| 1779      | LR-SURV | 6.773                     | 2          | 0    | 1808           | 59.441            | 0  | 0   |
| 1787      | LR-SURV | 22.225                    | 2          | 0    | 2075           | 68.219            | 0  | 0   |
| 1800      | LR-SURV | 2.433                     | 2          | 0    | 1827           | 60.066            | 0  | 0   |
| 1855      | LR-SURV | 0.855                     | 2          | 0    | 1264           | 6.148             | 0  | 1   |
| 1885      | LR-SURV | 12.460                    | 2          | 0    | 2813           | 92.482            | 0  | 0   |
| 1894      | LR-SURV | 9.140                     | 2          | 0    | 1955           | 64.274            | 0  | 0   |
| 1895      | LR-SURV | 5.688                     | 2          | 0    | 2209           | 72.625            | 0  | 0   |

| PatientID | Group   | Age at diagnosis (months) | INSS Stage | MYCN | OS time (days) | EFS time (months) | OS | EFS |
|-----------|---------|---------------------------|------------|------|----------------|-------------------|----|-----|
| 1897      | LR-SURV | 92.844                    | 2          | 0    | 2106           | 69.238            | 0  | 0   |
| 1902      | LR-SURV | 0.592                     | 2          | 0    | 3313           | 108.921           | 0  | 0   |
| 1910      | LR-SURV | 36.066                    | 2          | 0    | 1800           | 59.178            | 0  | 0   |
| 1944      | LR-SURV | 15.733                    | 2          | 0    | 2883           | 16.167            | 0  | 1   |
| 1945      | LR-SURV | 15.267                    | 2          | 0    | 1589           | 52.967            | 0  | 0   |
| 1946      | LR-SURV | 17.600                    | 2          | 0    | 1794           | 59.800            | 0  | 0   |
| 1947      | LR-SURV | 3.033                     | 2          | 0    | 1996           | 66.533            | 0  | 0   |
| 1948      | LR-SURV | 15.100                    | 2          | 0    | 2230           | 21.700            | 0  | 1   |
| 1951      | LR-SURV | 12.700                    | 2          | 0    | 2329           | 77.633            | 0  | 0   |
| 1952      | LR-SURV | 13.600                    | 2          | 0    | 3898           | 129.933           | 0  | 0   |
| 1953      | LR-SURV | 23.833                    | 2          | 0    | 1924           | 64.133            | 0  | 0   |
| 1954      | LR-SURV | 16.900                    | 2          | 0    | 2041           | 68.033            | 0  | 0   |
| 1958      | LR-SURV | 21.267                    | 2          | 0    | 2173           | 72.433            | 0  | 0   |
| 1962      | LR-SURV | 23.500                    | 2          | 0    | 3388           | 112.933           | 0  | 0   |
| 1963      | LR-SURV | 8.000                     | 2          | 0    | 1307           | 1.800             | 0  | 1   |
| 1966      | LR-SURV | 0.200                     | 2          | 0    | 1508           | 6.400             | 0  | 1   |
| 1967      | LR-SURV | 12.467                    | 2          | 0    | 2083           | 4.467             | 0  | 1   |
| 2084      | LR-SURV | 13.118                    | 2          | 0    | 1279           | 42.049            | 0  | 0   |
| 2102      | LR-SURV | 92.844                    | 2          | 0    | 2106           | 69.238            | 0  | 0   |
| 2103      | LR-SURV | 6.148                     | 2          | 0    | 2793           | 91.825            | 0  | 0   |
| 2104      | LR-SURV | 0.592                     | 2          | 0    | 3313           | 108.921           | 0  | 0   |
| 2118      | LR-SURV | 9.205                     | 2          | 0    | 2191           | 72.033            | 0  | 0   |
| 2160      | LR-SURV | 0.592                     | 2          | 0    | 1848           | 60.756            | 0  | 0   |
| 2660      | LR-SURV | 46.126                    | 2          | 0    | 1243           | 23.934            | 0  | 1   |
| 2738      | LR-SURV | 4.175                     | 2          | 0    | 4134           | 135.912           | 0  | 0   |
| 2743      | LR-SURV | 20.121                    | 2          | 0    | 1417           | 46.586            | 0  | 0   |
| 2760      | LR-SURV | 13.808                    | 2          | 0    | 1441           | 47.375            | 0  | 0   |
| 2765      | LR-SURV | 12.230                    | 2          | 0    | 1269           | 41.721            | 0  | 0   |
| 2796      | LR-SURV | 8.252                     | 2          | 0    | 1023           | 33.633            | 0  | 0   |
| 193       | LR-SURV | 7.627                     | 3          | 0    | 2678           | 32.844            | 0  | 1   |
| 267       | LR-SURV | 1.249                     | 3          | 0    | 2264           | 74.433            | 0  | 0   |
| 1178      | LR-SURV | 7.956                     | 3          | 0    | 1727           | 56.778            | 0  | 0   |
| 1507      | LR-SURV | 6.279                     | 3          | 0    | 2466           | 81.074            | 0  | 0   |
| 1513      | LR-SURV | 0.921                     | 3          | 0    | 1265           | 41.589            | 0  | 0   |
| 1722      | LR-SURV | 7.759                     | 3          | 0    | 1674           | 55.036            | 0  | 0   |
| 1761      | LR-SURV | 0.000                     | 3          | 0    | 2462           | 80.942            | 0  | 0   |
| 1774      | LR-SURV | 0.658                     | 3          | 0    | 1840           | 60.493            | 0  | 0   |
| 1777      | LR-SURV | 8.712                     | 3          | 0    | 1941           | 18.345            | 0  | 1   |
| 1819      | LR-SURV | 6.279                     | 3          | 0    | 1921           | 5.852             | 0  | 1   |
| 1832      | LR-SURV | 9.074                     | 3          | 0    | 1805           | 59.342            | 0  | 0   |
| 1839      | LR-SURV | 9.436                     | 3          | 0    | 1094           | 35.967            | 0  | 0   |
| 1846      | LR-SURV | 8.088                     | 3          | 0    | 2904           | 34.389            | 0  | 1   |
| 1850      | LR-SURV | 8.712                     | 3          | 0    | 1651           | 54.279            | 0  | 0   |
| 1861      | LR-SURV | 6.148                     | 3          | 0    | 1907           | 62.696            | 0  | 0   |
| 1880      | LR-SURV | 0.822                     | 3          | 0    | 1257           | 41.326            | 0  | 0   |
| 1881      | LR-SURV | 5.885                     | 3          | 0    | 3011           | 98.992            | 0  | 0   |
| 1888      | LR-SURV | 4.077                     | 3          | 0    | 2616           | 86.005            | 0  | 0   |
| 1889      | LR-SURV | 7.825                     | 3          | 0    | 2766           | 90.937            | 0  | 0   |
| 1890      | LR-SURV | 7.003                     | 3          | 0    | 1598           | 52.537            | 0  | 0   |
| 1956      | LR-SURV | 10.133                    | 3          | 0    | 3072           | 3.267             | 0  | 1   |
| 1960      | LR-SURV | 7.6                       | 3          | 0    | 2707           | 90.233            | 0  | 0   |
| 2114      | LR-SURV | 6.279                     | 3          | 0    | 2466           | 81.074            | 0  | 0   |
| 2661      | LR-SURV | 1.512                     | 3          | 0    | 1860           | 3.847             | 0  | 1   |
| 318       |         | 3.123                     | 4          | 0    | 2059           | 67.693            | 0  | 0   |
| 1179      |         | 6.082                     | 4          | 0    | 1340           | 44.055            | 0  | 0   |
| 1773      |         | 3.616                     | 4          | 0    | 2103           | 2.301             | 0  | 1   |
| 1792      |         | 3.058                     | 4          | 0    | 1814           | 1.742             | 0  | 1   |
| 1797      |         | 2.860                     | 4          | 0    | 1952           | 64.175            | 0  | 0   |
| 2067      |         | 10.389                    | 4          | 0    | 1378           | 45.304            | 0  | 0   |
| 2068      |         | 10.389                    | 4          | 0    | 1378           | 45.304            | 0  | 0   |
| 2085      |         | 7.792                     | 4          | 0    | 1988           | 1.874             | 0  | 1   |
| 2121      |         | 11.573                    | 4          | 0    | 2191           | 72.033            | 0  | 0   |
| 1780      |         | 1.447                     | 1          | 0    | 957            | 31.463            | 0  | 0   |
| 1785      |         | 6.575                     | 1          | 0    | 10             | 0.329             | 0  | 0   |

| PatientID | Group | Age at diagnosis (months) | INSS Stage | MYCN | OS time (days) | EFS time (months) | OS | EFS |
|-----------|-------|---------------------------|------------|------|----------------|-------------------|----|-----|
| 1791      |       | 6.608                     | 1          | 0    | 336            | 11.047            | 0  | 0   |
| 1794      |       | 0.690                     | 1          | 0    | 927            | 30.477            | 0  | 0   |
| 1796      |       | 1.348                     | 1          | 0    | 721            | 23.704            | 0  | 0   |
| 1810      |       | 1.775                     | 1          | 0    | 177            | 5.819             | 0  | 0   |
| 1811      |       | 11.868                    | 1          | 0    | 1              | 0.033             | 0  | 0   |
| 1812      |       | 5.162                     | 1          | 0    | 539            | 17.721            | 0  | 0   |
| 1825      |       | 10.685                    | 1          | 0    | 838            | 27.551            | 0  | 0   |
| 1826      |       | 6.740                     | 1          | 0    | 734            | 24.132            | 0  | 0   |
| 1835      |       | 1.019                     | 1          | 0    | 440            | 14.466            | 0  | 0   |
| 1836      |       | 8.811                     | 1          | 0    | 14             | 0.460             | 0  | 0   |
| 1840      |       | 5.589                     | 1          | 0    | 928            | 30.510            | 0  | 0   |
| 1854      |       | 2.038                     | 1          | 0    | 35             | 1.151             | 0  | 0   |
| 1858      |       | 1.940                     | 1          | 0    | 166            | 5.458             | 0  | 0   |
| 1860      |       | 3.090                     | 1          | 0    | 105            | 3.452             | 0  | 0   |
| 1884      |       | 29.063                    | 1          | 0    | 996            | 32.745            | 0  | 0   |
| 1934      |       | 3.847                     | 1          | 0    | 608            | 19.989            | 0  | 0   |
| 2089      |       | 1.052                     | 1          | 0    | 855            | 28.110            | 0  | 0   |
| 1702      |       | 6.900                     | 2          | 0    | 1820           | 22.467            | 1  | 1   |
| 1793      |       | 9.962                     | 2          | 0    | 189            | 6.214             | 0  | 0   |
| 1795      |       | 1.874                     | 2          | 0    | 317            | 0.756             | 1  | 1   |
| 1813      |       | 4.340                     | 2          | 0    | 154            | 5.063             | 0  | 0   |
| 1848      |       | 4.110                     | 2          | 0    | 775            | 25.479            | 0  | 0   |
| 1935      |       | 6.378                     | 2          | 0    | 698            | 22.948            | 0  | 0   |
| 1937      |       | 10.521                    | 2          | 0    | 0              | 0.000             | 0  | 0   |
| 1957      |       | 152.067                   | 2          | 0    | 1773           | 25.300            | 1  | 1   |
| 520       |       | 156.986                   | 3          | 0    | 1499           | 36.658            | 0  | 1   |
| 1516      |       | 43.923                    | 3          | 0    | 298            | 9.797             | 0  | 0   |
| 1760      |       | 27.649                    | 3          | 0    | 1806           | 59.375            | 0  | 0   |
| 1772      |       | 26.104                    | 3          | 0    | 1547           | 50.860            | 0  | 0   |
| 1775      |       | 13.710                    | 3          | 0    | 1064           | 34.981            | 0  | 0   |
| 1781      |       | 6.575                     | 3          | 0    | 421            | 13.841            | 0  | 0   |
| 1802      |       | 8.351                     | 3          | 0    | 366            | 12.033            | 0  | 0   |
| 1805      |       | 23.178                    | 3          | 0    | 922            | 30.312            | 0  | 0   |
| 1816      |       | 1.019                     | 3          | 0    | 637            | 20.942            | 0  | 0   |
| 1818      |       | 9.468                     | 3          | 0    | 339            | 11.145            | 0  | 0   |
| 1859      |       | 4.767                     | 3          | 0    | 760            | 24.986            | 0  | 0   |
| 1887      |       | 27.715                    | 3          | 0    | 4184           | 137.556           | 0  | 0   |
| 1949      |       | 37.533                    | 3          | 0    | 1998           | 41.533            | 0  | 1   |
| 1955      |       | 94.367                    | 3          | 0    | 2286           | 22.833            | 0  | 1   |
| 2069      |       | 13.184                    | 3          | 0    | 2069           | 37.644            | 0  | 1   |
| 2070      |       | 21.337                    | 3          | 0    | 2444           | 80.351            | 0  | 0   |
| 2098      |       | 18.641                    | 3          | 0    | 3196           | 105.074           | 0  | 0   |
| 2666      |       | 22.356                    | 3          | 0    | 1296           | 42.608            | 0  | 0   |
| 2704      |       | 47.605                    | 3          | 0    | 1758           | 57.797            | 0  | 0   |
| 2705      |       | 44.548                    | 3          | 0    | 1798           | 59.112            | 0  | 0   |
| 2706      |       | 19.200                    | 3          | 0    | 1286           | 42.279            | 0  | 0   |
| 2742      |       | 55.233                    | 3          | 0    | 1398           | 45.962            | 0  | 0   |
| 2745      |       | 55.496                    | 3          | 0    | 1442           | 47.408            | 0  | 0   |
| 2746      |       | 38.860                    | 3          | 0    | 1063           | 34.948            | 0  | 0   |
| 2748      |       | 16.603                    | 3          | 0    | 1060           | 34.849            | 0  | 0   |
| 2754      |       | 28.274                    | 3          | 0    |                |                   |    | 0   |
| 2755      |       | 110.301                   | 3          | 0    | 1198           | 30.444            |    | 1   |
| 2759      |       | 57.995                    | 3          | 0    | 1247           | 40.997            | 0  | 0   |
| 2761      |       | 23.507                    | 3          | 0    | 709            | 23.310            | 0  | 0   |
| 2764      |       | 19.463                    | 3          | 0    | 1100           | 36.164            | 0  | 0   |
| 2793      |       | 1.677                     | 3          | 0    | 142            | 2.762             |    | 1   |
| 1803      |       | 52.932                    | 4          | 0    | 259            | 8.515             | 0  | 0   |
| 2778      |       | 36.953                    | 4          | 0    | 264            |                   | 1  | 1   |
| 2782      |       | 32.318                    | 4          | 0    | 344            | 11.310            | 0  | 0   |
| 764       |       | 26.038                    | 3          | 0    | 1006           | 33.074            | 0  | 0   |
| 323       |       | 8.482                     | 4s         | 0    | 1567           | 51.518            | 0  | 0   |
| 330       |       | 3.682                     | 4s         | 0    | 2207           | 72.559            | 0  | 0   |
| 1495      |       | 1.019                     | 4s         | 0    | 5494           | 180.625           | 0  | 0   |
| 1508      |       | 1.019                     | 4s         | 0    | 36             | 1.052             | 1  | 1   |

| PatientID | Group | Age at diagnosis (months) | INSS Stage | MYCN | OS time (days) | EFS time (months) | OS | EFS |
|-----------|-------|---------------------------|------------|------|----------------|-------------------|----|-----|
| 1510      |       | 0.789                     | 4s         | 0    | 1461           | 1.940             | 0  | 1   |
| 1511      |       | 6.345                     | 4s         | 0    | 1461           | 48.033            | 0  | 0   |
| 1512      |       | 1.644                     | 4s         | 0    | 1461           | 48.033            | 0  | 0   |
| 1514      |       | 7.036                     | 4s         | 0    | 1091           | 35.868            | 0  | 0   |
| 1717      |       | 3.485                     | 4s         | 0    | 1911           | 62.827            | 0  | 0   |
| 1765      |       | 1.874                     | 4s         | 0    | 3777           | 124.175           | 0  | 0   |
| 1771      |       | 9.995                     | 4s         | 0    | 3454           | 48.986            | 0  | 1   |
| 1801      |       | 0.855                     | 4s         | 0    | 394            | 12.953            | 0  | 0   |
| 1806      |       | 1.085                     | 4s         | 0    | 1590           | 52.274            | 0  | 0   |
| 1830      |       | 0.099                     | 4s         | 0    | 2039           | 67.036            | 0  | 0   |
| 1842      |       | 0.460                     | 4s         | 0    | 1503           | 49.414            | 0  | 0   |
| 1844      |       | 0.296                     | 4s         | 0    | 1562           | 51.353            | 0  | 0   |
| 1921      |       | 2.532                     | 4s         | 0    | 2192           | 72.066            | 0  | 0   |
| 1922      |       | 8.811                     | 4s         | 0    | 2009           | 66.049            | 0  | 0   |
| 1928      |       | 4.405                     | 4s         | 0    | 1461           | 2.860             | 0  | 1   |
| 2021      |       | 7.101                     | 4s         | 0    | 1092           | 35.901            | 0  | 0   |
| 2022      |       | 7.101                     | 4s         | 0    | 1092           | 35.901            | 0  | 0   |
| 2086      |       | 6.181                     | 4s         | 0    | 2518           | 82.784            | 0  | 0   |
| 2087      |       | 3.649                     | 4s         | 0    | 2497           | 82.093            | 0  | 0   |
| 2112      |       | 5.162                     | 4s         | 0    | 2575           | 84.658            | 0  | 0   |
| 2115      |       | 8.351                     | 4s         | 0    | 2539           | 83.474            | 0  | 0   |
| 2116      |       | 0.888                     | 4s         | 0    | 2192           | 72.066            | 0  | 0   |
| 2159      |       | 2.893                     | 4s         | 0    | 2178           | 71.605            | 0  | 0   |
| 2166      |       | 4.405                     | 4s         | 0    | 1461           | 2.860             | 0  | 1   |
| 2168      |       | 11.605                    | 4s         | 0    | 1469           | 48.296            | 0  | 0   |
| 2713      |       | 11.375                    | 4s         | 0    | 2182           | 10.751            | 0  | 1   |
| 2715      |       | 5.852                     | 4s         | 0    | 1770           | 3.912             | 0  | 1   |
| 2757      |       | 0.263                     | 4s         | 0    | 1909           | 7.036             | 0  | 1   |
| 2763      |       | 7.397                     | 4s         | 0    | 1940           | 3.551             | 0  | 1   |
| 334       |       | 6.247                     | 1          | 1    | 2190           | 72.000            | 0  | 0   |
| 1751      |       | 26.071                    | 1          | 1    | 760            | 22.521            | 1  | 1   |
| 1938      |       | 24.526                    | 2          | 1    | 641            | 21.074            | 0  | 0   |
| 1136      |       | 22.323                    | 3          | 1    | 862            | 28.340            | 0  | 0   |
| 1687      |       | 31.496                    | 3          | 1    | 822            | 27.025            | 0  | 0   |
| 1834      |       | 23.638                    | 3          | 1    | 205            | 6.740             |    | 0   |
| 1786      |       | 17.918                    | 4          | 1    | 125            | 4.110             |    | 0   |
| 2785      |       | 18.838                    | 4          | 1    | 524            | 17.227            | 0  | 0   |
| 2786      |       | 21.830                    | 4          | 1    | 576            | 18.937            | 0  | 0   |
| 1837      |       | 0.559                     | 4s         | 1    | 2178           | 71.605            | 0  | 0   |
| 1933      |       | 10.455                    | 1          |      | 500            | 16.438            | 0  | 0   |
| 1849      |       | 10.060                    | 2          |      | 2136           | 43.068            | 0  | 0   |
| 2774      |       | 7.463                     | 2          |      | 1461           | 14.104            | 0  | 1   |
| 1856      |       | 10.652                    | 4          |      | 295            | 8.679             |    | 1   |
| 1931      |       | 48.822                    | 4          |      | 1049           | 34.488            | 0  | 0   |
| 1932      |       | 23.408                    | 4          |      | 1137           | 30.970            | 0  | 1   |
| 2783      |       | 26.137                    | 4          |      | 484            | 15.912            | 0  | 0   |



| <b>Characteristic</b>      | <b>Classes</b>               | <b>Count (percentage)</b> |
|----------------------------|------------------------------|---------------------------|
| <b>Risk Classification</b> | HR-DOD                       | 46/245 (19%)              |
|                            | HR-SURV                      | 29/245 (12%)              |
|                            | LR-SURV                      | 170/245 (69%)             |
| <b>INSS Stage</b>          | 1                            | 115/366 (31%)             |
|                            | 2                            | 69/366 (20%)              |
|                            | 3                            | 66/366 (18%)              |
|                            | 4                            | 82/366 (22%)              |
|                            | 4S                           | 34/366 (9%)               |
| <b>MYCN</b>                | Not amplified                | 307/357 (86%)             |
|                            | Amplified                    | 50/357 (14%)              |
| <b>Age</b>                 | Age at diagnosis > 12 months | 191/366 (52%)             |
|                            | Age at diagnosis < 12 months | 175/366 (48%)             |

| <b>Name</b>  | <b>Forward primer</b> | <b>Reverse primer</b> | <b>cDNA location</b>   | <b>Genomic location</b>  |
|--------------|-----------------------|-----------------------|------------------------|--------------------------|
| <i>CNR1</i>  | ACCAGGGTTTAGTTGCATT   | GAGCTCTGAAACATGTGGAT  | NM_001160226:4107-4189 | chr6: 88851256- 88851338 |
| <i>GRB10</i> | TCCCAGAACAGATGGTACT   | AGGACAACACTGGAGTTCA   | NM_001001550:895-984   | chr7:50684018-50685829   |
| <i>KRT19</i> | CGACTACAGCCACTACTACA  | AACTTGGTTCGGAAGTCATC  | NM_002276:516-648      | chr17:39681440-39684125  |
| <i>PRPH</i>  | CATCCCTTTCCTGGCTTATG  | GCACATAGGTCACATCAAGT  | NM_006262:1601-1689    | chr12:49692250-49692337  |
| <i>QPCT</i>  | GGAACTTGCTCGTGCCTTAG  | TCTGGCTTGGAGTCTGAAACA | NM_012413:625-691      | chr2:37586959-37594397   |







Stage

Relative mRNA expression

0 6 12

**CNR1**  
p<0.001

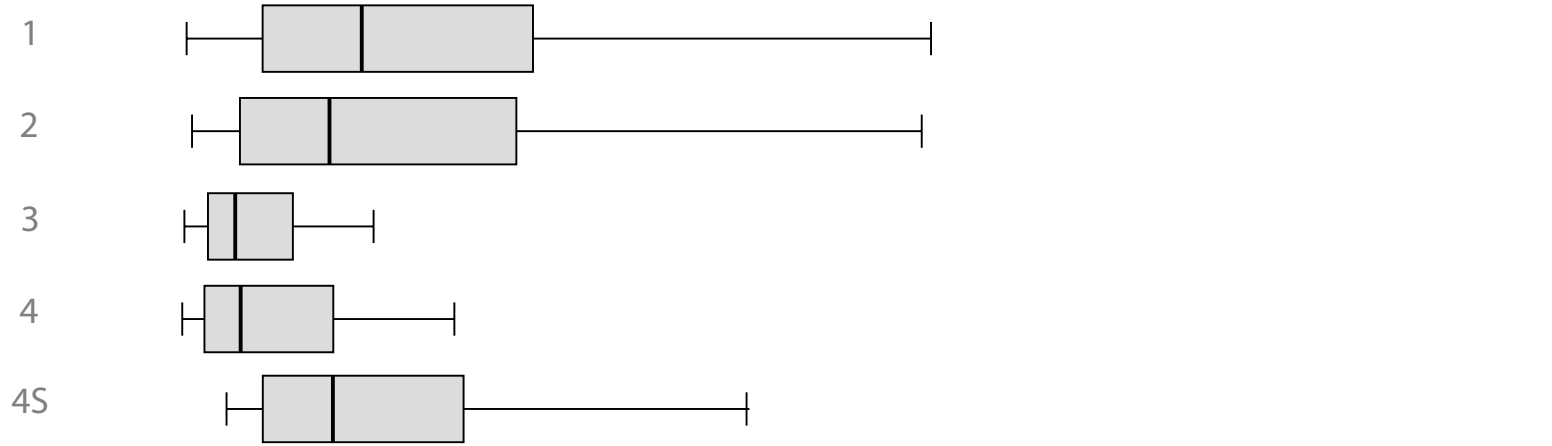

**GRB10**  
p=0.008

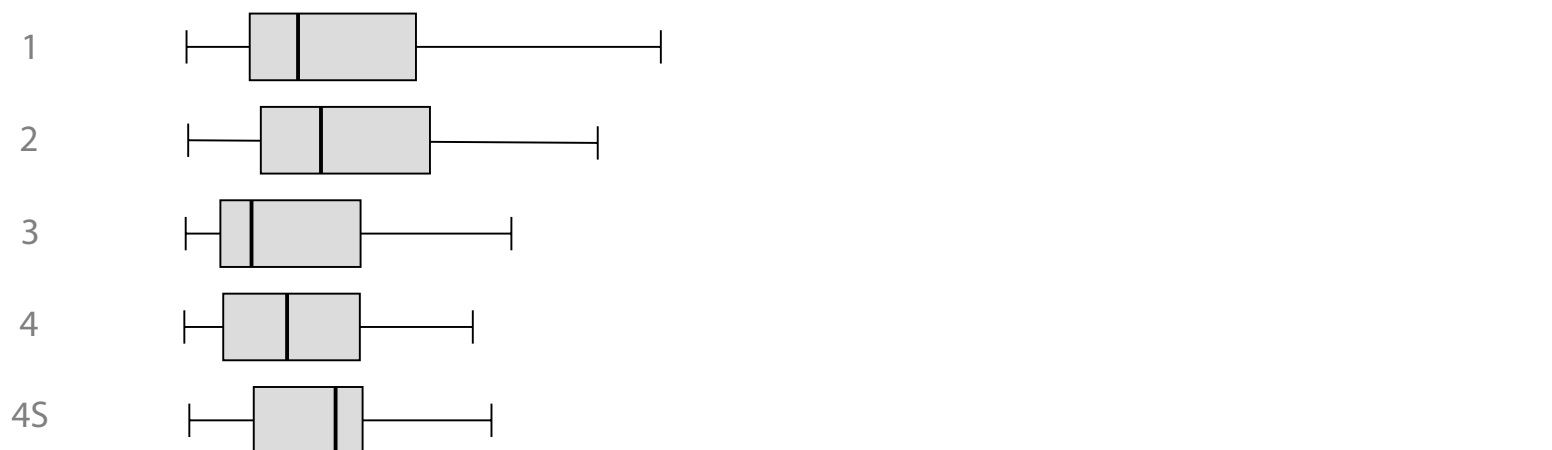

**QPCT**  
p<0.001

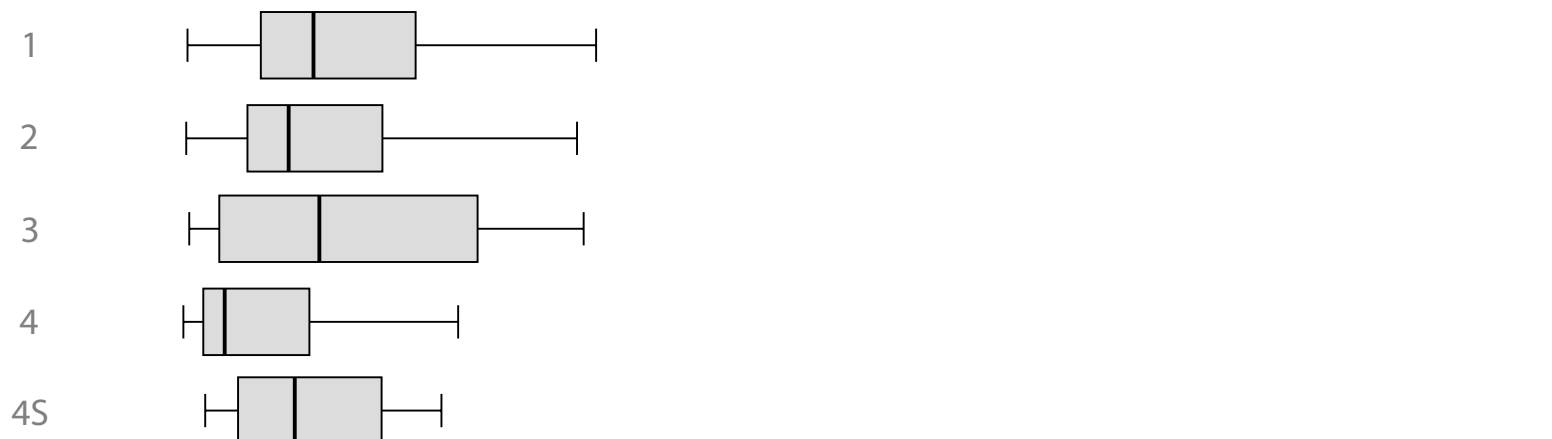

**KRT19**

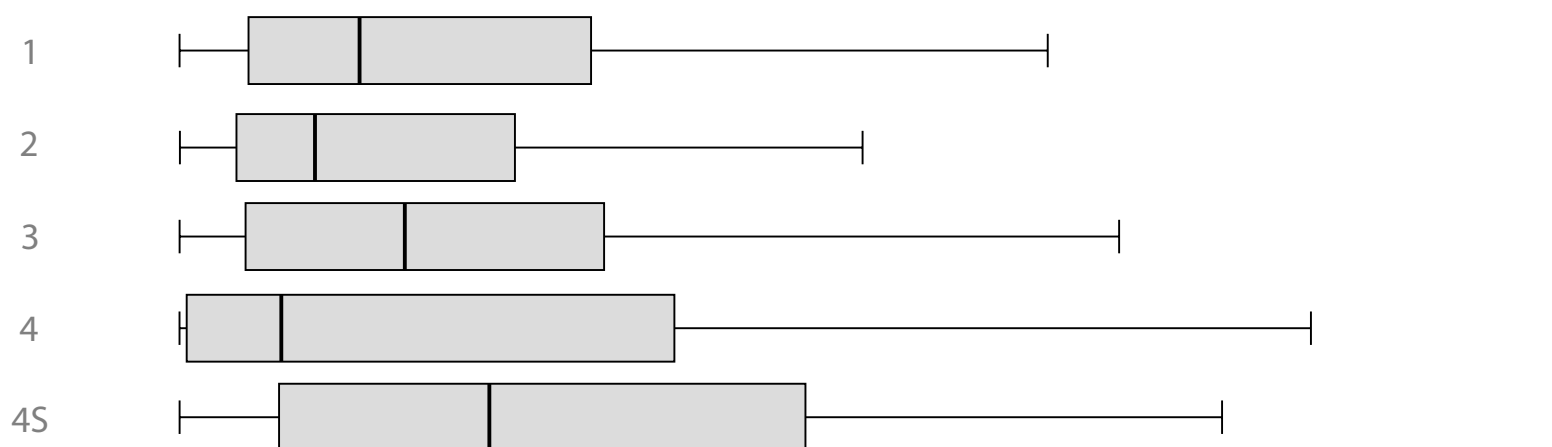

**PRPH**  
p=0.010

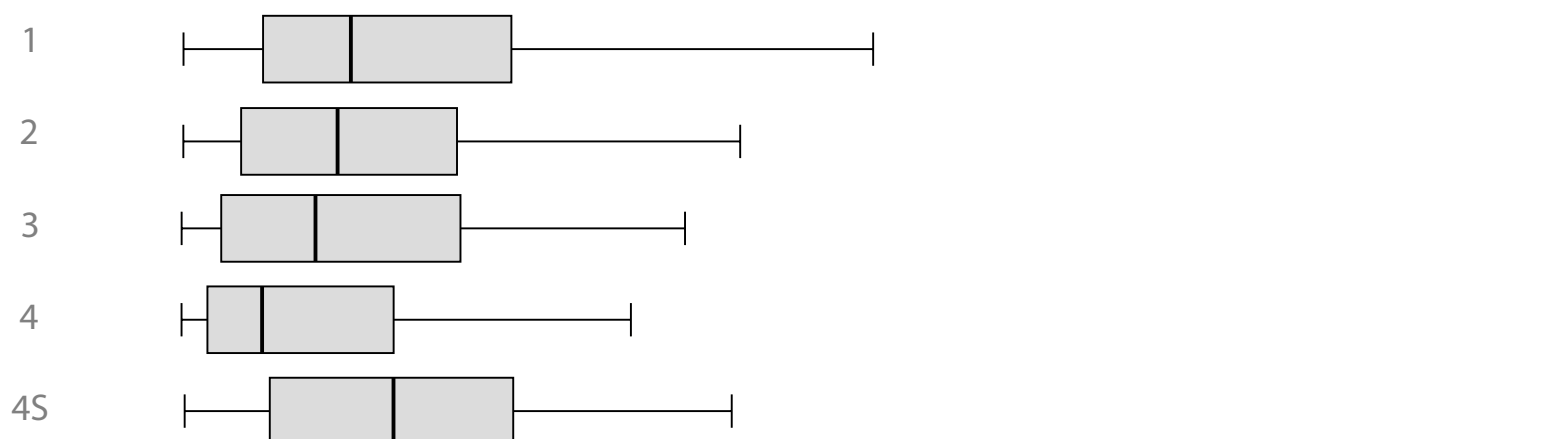

0 6 12

Expression

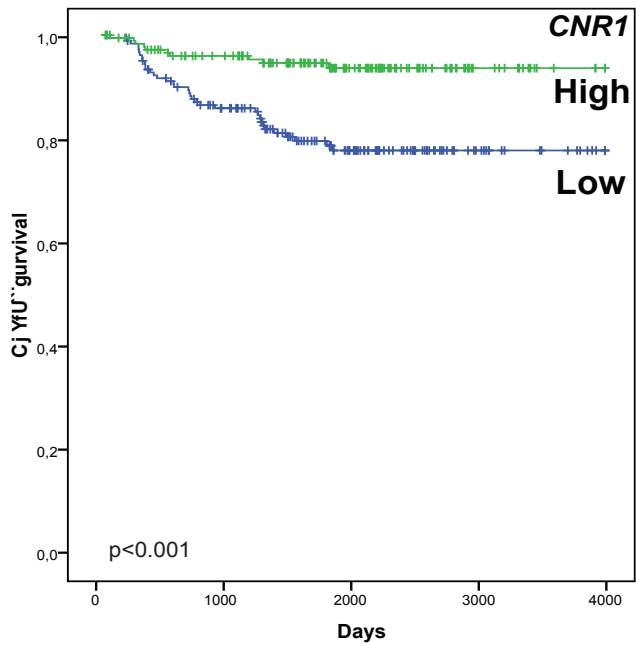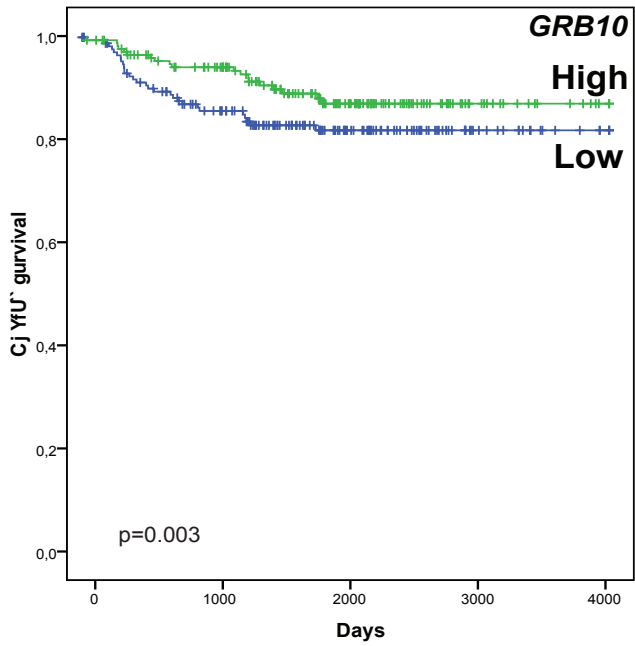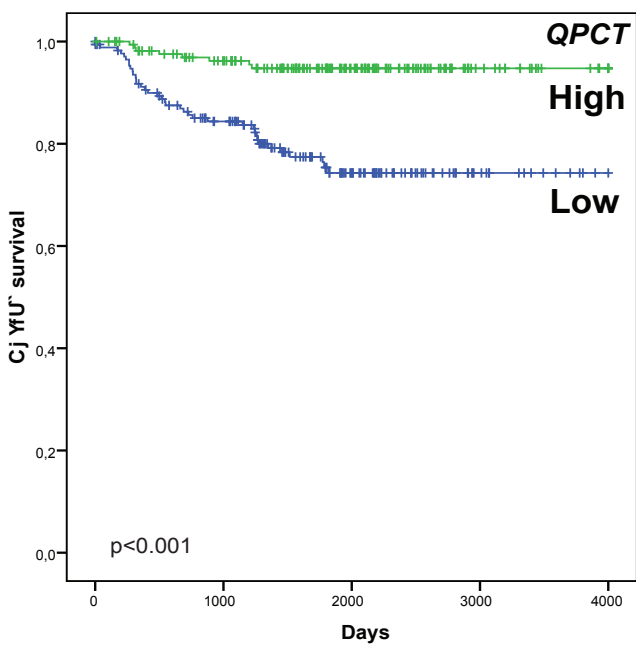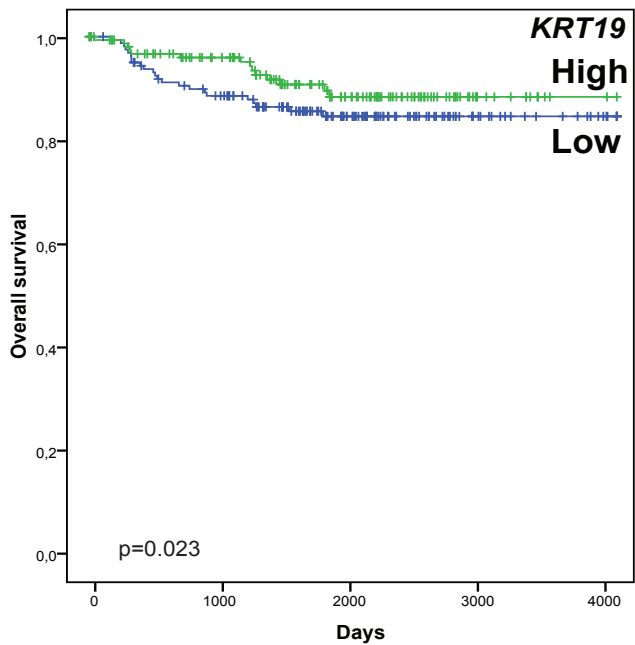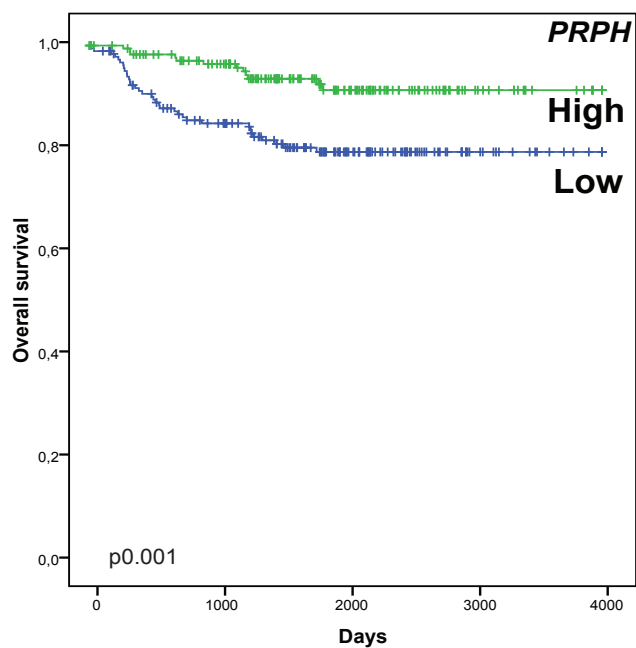

Supplement: gb-2012-13-10-r95-S4.pdf [file gb-2012-13-10-r95-S4.pdf]
