# Supplementary material for: Genome-wide promoter methylation analysis in neuroblastoma identifies prognostic methylation biomarkers
Source: PubMed Central journal article supplement (PMC3491423; doi:10.1186/gb-2012-13-10-r95), 2012-10-03
Supplement: gb-2012-13-10-r95-S1.pdf [file gb-2012-13-10-r95-S1.pdf]

**Part BioTrove clinical annotation:** Patient characteristics of the samples used for the initial high-throughput MSP screening on the BioTrove OpenArray. PatientID is a unique patient number, the group indicates the risk. Clinical characteristics given are the age at diagnosis in months, International Neuroblastoma Staging System (INSS) stage, *MYCN* status (0 is non-amplified/single copy and 1 is amplified), follow-up time (FU) in days after diagnosis, and overall survival (OS) and event-free survival (EFS) time in days after diagnosis. OS indicates whether the patient was alive (0) at the last known FU or died of disease (1). Similar for EFS, indicating events, such as relapse or progression. Empty cells represent missing values.

**Part BioTrove assays:** MSP assays used in the initial high-throughput MSP screening on the BioTrove OpenArray. For each tested gene, the assay name(s) and corresponding forward and reverse primer(s) (5' to 3') are indicated, as well as the genomic location of the amplicon on the hg19 reference genome.

**Part BioTrove results:** Results of the initial high-throughput MSP screening on the BioTrove OpenArray. For each assay and sample, the methylation call (dark blue is methylated, green unmethylated) is given. Samples are subdivided into two prognostic groups (HR-DOD and LR-SURV). The specificity and sensitivity of the assays is indicated as well. Assays selected for further testing are indicated in yellow. HR-DOD: high-risk deceased patients and LR-SURV: low-risk patients alive for at least 1000 days follow-up.

| PatientID | Group   | Age at diagnosis (months) | INSS Stage | MYCN | FU time (days) | OS time (days) | EFS time (days) | OS | EFS |
|-----------|---------|---------------------------|------------|------|----------------|----------------|-----------------|----|-----|
| 589       | HR-DOD  | 421                       | 4          | 0    | 4569           | 4569           | 2958            | 1  | 1   |
| 389       | HR-DOD  | 42                        | 4          | 0    | 581            | 581            | 449             | 1  | 1   |
| 7         | HR-DOD  | 65                        | 4          | 0    | 3364           | 3364           | 2539            | 1  | 1   |
| 911       | HR-DOD  | 64                        | 4          | 1    | 300            | 300            |                 | 1  | 1   |
| N432      | HR-DOD  | 36                        | 4          | 1    | 549            | 549            | 480             | 1  | 1   |
| 811       | HR-DOD  | 67                        | 4          | 0    | 944            | 944            | 209             | 1  | 1   |
| 499       | HR-DOD  | 47                        | 4          | 1    | 268            | 268            | 254             | 1  | 1   |
| 857       | HR-DOD  | 71                        | 4          | 0    | 877            | 877            | 728             | 1  | 1   |
| 3         | HR-DOD  | 20                        | 3          | 0    | 639            | 639            | 438             | 1  | 1   |
| N159      | HR-DOD  | 57                        | 4          |      | 653            | 653            | 553             | 1  | 1   |
| 498       | HR-DOD  | 23                        | 3          | 1    | 531            | 531            | 450             | 1  | 1   |
| 510       | LR-SURV | 4                         | 4S         | 0    | 2207           | 2207           |                 | 0  | 0   |
| 711       | LR-SURV | 17                        | 2          | 0    | 1885           | 1885           |                 | 0  | 0   |
| 278       | LR-SURV | 15                        | 1          | 0    | 3404           | 3404           |                 | 0  | 0   |
| 774       | LR-SURV | 4                         | 4S         | 0    | 2182           | 2182           |                 | 0  | 0   |
| 1383      | LR-SURV | 0                         | 4S         | 0    | 2122           | 2122           |                 | 0  | 0   |
| 397       | LR-SURV | 18                        | 2          | 0    | 3555           | 3555           |                 | 0  | 0   |
| 518       | LR-SURV | 0                         | 4S         | 0    | 2050           | 2050           |                 | 0  | 0   |
| 58        | LR-SURV | 10                        | 2          | 0    | 4858           | 4858           |                 | 0  | 0   |
| 824       | LR-SURV | 1                         | 2          | 0    | 997            | 997            |                 | 0  | 0   |

| Name            | Forward primer           | Reverse primer           | Genomic location          |
|-----------------|--------------------------|--------------------------|---------------------------|
| TNFRSF10D_23780 | TCGGGGTATAAAAGCGGAG      | ATCAAAAATCGTCCCCTGAA     | chr8:23021486-23021578    |
| KRT19_83159     | GGTCGCGGGTATAAAAGGC      | CATAACGAAACGAAACACGAA    | chr17:39684496-39684598   |
| TNFRSF10A_65529 | GGTATTTAGTAGGCGTTCGGTG   | ACTCGCCCGATAATAACGAAA    | chr8:23082862-23082978    |
| RARRS1_57581    | GCGAAATCGTAGGGGAAAC      | ATAAAAACGCTCCCGGAAA      | chr3:158450497-158450595  |
| KRT19_61596     | TTATAGTTATCGTTAGTCGCGGT  | ACCCCGTAAATACTAAACGC     | chr17:39684382-39684491   |
| CASP8M_1        | TAGGGGATTCGAGATTGCGA     | CGTATATCTACATTCGAAACGA   | chr2:202123060-202123380  |
| CYGB_83388      | TCGTGTGGGTAAGAGTTAATGTCG | CTCCCGCGTAACCTACGAA      | chr17:74533911-74534004   |
| CTDSPL_23804    | GTTTTTGGGAGAGCGGTTCC     | TCATAATAACGAAACGACGACC   | chr10:39303464-37903550   |
| FBN2_18150      | TCGGAGTTTTATAGGGTAACGAA  | CTCTTACTAACCGCACGCC      | chr5:127873815-127873902  |
| PDLIM4_4        | GGCGTTTAGGTTAATTTTTTCGT  | CGATCCCATATCTAAAACCGA    | chr5:131593549-131593644  |
| CXCR4_70046     | CGGTGGGTAGTGGGTAGTC      | TAAAACTCAAAACGATAAACACG  | chr2:136874383-136874463  |
| RBP4_24106      | GGTCGTTTTGTTGTTTTATAGC   | GCGTTATACAAAATACCCCGC    | chr10:95361003-95361106   |
| RBP1_83281      | TGCGTTGTTTTGTTAAGC       | CTAAATCCCAACGCGCAC       | chr3:139258517-139258597  |
| NPTX2_57773     | TTTTAGTTTTGACGTTCCGCGTT  | TAAAACCTCTGAAAACCTCGACT  | chr7:98246269-98246349    |
| PPIC_69739      | CGGTGTTGTTATTTTTGTTGTT   | CTCTCGATCACCTTAACCGTC    | chr5:122372192-122372305  |
| GREM1_83135     | TCCGTTTTGTTGATTTTCGC     | GCGCTACCTATCAATACGAC     | chr15:33010259-33010370   |
| GATA4_13295     | GGTATTGTTATTTGCGTTTTTC   | CCCGAAACAACTACACGAC      | chr8:11562180-11562274    |
| CSRP1_12560     | TAGTGGCGCGTAGAATCGT      | CTAAACACAATTAACCTCCGCGT  | chr1:201475888-201475990  |
| HPGD_82365      | TATTTGATGGGAGCGTTTC      | GATAAACGAACTCCGCGTCT     | chr4:175443626-175443719  |
| NPY_18477       | TTTTATTCGATGGCGTTGTC     | AACAACCTAACGATCTCCCTACGA | chr7:24324196-24324288    |
| CDKN2B_27347    | TTTTTATTTGTTAGAGCGAGGC   | ACCGAAGCTAAAACCGCTC      | chr9:22009225-22009309    |
| FAS_18143       | TTTTTGATTATCGGGTTTTTC    | AACCAATCACTCGTAAACCG     | chr10:90750369-90750484   |
| S100A6_83933    | AGAATTTATCGGTAGGGAGGC    | ATAAAACCAATCGAACTACGACA  | chr1:153508415-153508496  |
| IGFBP1_82382    | GATTGTTTAGGTCGGCGTG      | GAATAACCTCCGAACACGAA     | chr7:45928298-45928408    |
| PRTFDC1_82627   | GTTTTTAGAGTAGTACGCGGGG   | ATAACTCGCTCCTACAACGTC    | chr10:25241095-25241214   |
| EOMES_82239     | TTCGTCGTTGATGTCGTCGT     | CGAAAACATAAAATAATACCGCTC | chr3:27763337-27763440    |
| LATS2_82421     | GAGAGGTTTTGGCGAGTTATC    | TAACCTACTTCCACTCCGAC     | chr13:21635825-21635906   |
| TMEFF2_8419     | AGTCGGAGGATAGGAGGAGAC    | AAAACGACTACCGAACTACGAAA  | chr2:193059529-193059633  |
| DLC1_9164       | CGGGAGATAGTTGTTTCGAT     | GAAAAATCCGTAACCGACGC     | chr8:12990704-12990806    |
| NQO1_52551      | TATAAGGTTGATGCGGAGTCGT   | CTCTAATAACAATCCGAAACGCTA | chr16:69760344-69760451   |
| SST_23808       | TGGTTGCGTTGTTTTATCGTTT   | TTACCTACTTCCCGCGAC       | chr3:187387934-187388048  |
| SLIT3_23619     | AGGGGTATTTATAGGCGTTTAGC  | TACCTACTCCGCTACCAACGTAA  | chr5:168727504-168727600  |
| HOXA9_77983     | GGATGAGTTGAGCGTTGGTC     | CACGAACTAAAATCGAAATACTCG | chr7:27204915-27205011    |
| TNFSF9_30093    | TAGGGTTTAAAGGTAGTACGCGGT | AATCTCTCGCTATAAAATACGCC  | chr19:6531036-6531140     |
| NF2_23823       | TAGGACCGGTGATAGTTACCG    | AAACCCCTAAACGACAACGAA    | chr22:29999568-29999681   |
| NAB2_69824      | GAGTTTGGATAGCGGTGGATAC   | CTACCCCTTCTCGATACCCGAC   | chr12:57482944-57483032   |
| NADK_83330      | TTGGTCGTTAGAGGTGGGC      | AACTACGCAACGCTACGCTC     | chr1:1710436-1710542      |
| TBX3_83233      | ATATGATTAGAGGGCGGGC      | CCAAAACGAAACGAAACGAA     | chr12:115122200-115122311 |
| FOXE1_13317     | CGGAGAGTTTAGGGGATCGT     | CTCTATCTACACCGCGCA       | chr9:100615988-100616099  |
| DSC3_52554      | GTCCGGTAGGGTTAGGAGAAC    | CTTAAAAACAACAACGACGAAA   | chr18:28622632-28622738   |
| PCDH10_82547    | TTTTGTTTTGCGTAGCGT       | TAAACCAATCATCGACAACCTCG  | chr4:134070348-134070428  |
| KRAS_82400      | TTTTTGTGGAGATCGGTTAGC    | AACCGCGCAACTATACG        | chr12:25404255-25404335   |
| SOCS3_53602     | GCGTAGTTTTAGGAATCGGGG    | ACCGAAACGACAACAACGAAA    | chr17:76356116-76356228   |
| TP73_1          | CGGGTTTTGTAGGAGCGAC      | AACTAACCGCTCCAAATCG      | chr1:3568823-3568913      |
| ADAM23_66271    | TTGTCGCGTTATACGGAGC      | GACAAAACCTACAACCGCCA     | chr2:207308550-207308647  |
| PPIC_69743      | CGAGTTTGAATTTGGGAGGAA    | GAAACTACCGCAACTACGCG     | chr5:122372395-122372503  |
| MYST4_82478     | GTAAGTTTGGGCGAAGGAC      | AACGAAAAATATACCGCCA      | chr10:76584918-76585025   |
| FABP5_82270     | TTATTGGTCGATAGCGTCGT     | AACAACGTAATAAAACACCCGA   | chr8:82192702-82192783    |
| MAL_74689       | TTGTGGCGGTGGTTTAGTTTC    | TTCAATTTTCCGCTAAATACGTT  | chr2:95690978-95691062    |
| SLC44A3_83942   | GGGTACCGGTGATGCGTCGT     | AACGAAACCAATAAACCGC      | chr1:95285787-95285867    |
| TP73_72009      | TTGTCGTTTTGTTTTGTTTTAC   | TCGCTCTACCCAATCAACG      | chr1:3567209-3567290      |
| TNFRSF10C_9282  | TTTGTGTTAGTAGTATTCGGTC   | ATCCCTACCGTATCCCGTCT     | chr8:22960684-22960777    |
| CTCF1_23792     | TTCCGGTTAGTGTATATTCGG    | ACTAAATCTAAAACCGTACACGA  | chr20:56099721-56099801   |
| PCDH20_23327    | GCGTTATTGTGTTAATTTTCGAGT | ATAATTTCTACCCCGAACG      | chr13:61989460-61989572   |
| THBD_82800      | GTCGGAGTAGAGGGTATAGGAC   | AAAACCTACGCGCAACGACA     | chr20:23030201-23030289   |
| MORN1_83172     | AATTATTTTCGTTTTCCGCGT    | GTTTCCGCGCTATCGTCT       | chr1:2323131-2323211      |
| ROBO3_64828     | GAGGAGGTACGAAGAGGTATC    | AAACCCGTAACATAAAACCGTAA  | chr11:124735301-124735418 |
| MRC2_9206       | TTGCGATTTTAAAGTTTTTACGTC | AAAATCCCAACGCTACGTC      | chr17:60704638-60704742   |
| NPTX2_57779     | GCGTCGTTTTGATGGGTATC     | CCCGATAACCGCTTCGAT       | chr7:98246839-98246928    |
| GATA4_2         | AGGTTAGTTAGCGTTTTAGGGTC  | ACGACGACGAAACCTCTCG      | chr8:11561654-11561760    |
| DNAJC15_2       | TTGGGTAAACGTTTTCGTGT     | ACTCCCTAAAAATCCGCGT      | chr13:43597490-43597604   |
| IGFBP3_54583    | TGTAGACGATAAGGTGATTCGG   | CTCGAAAACGTAACAACCTCGAAA | chr7:45961026-45961109    |
| RASSF1A         | GCGTTGAAGTCGGGGTTC       | CCCGTACTTCGTAACCTTAAACG  | chr3:50378248-50378323    |
| CCNA1_1         | GTTATATGTATCGGGAGTCGGG   | CGACTAAAACGCGACGAAA      | chr13:37005782-37005893   |
| TNFRSF10D_23781 | AAGAGGAGATAGCGGTTCC      | AAAACCTAAAACGCTACCCGCT   | chr8:23021780-23021893    |
| SLC44A3_83941   | AGTTGAGTCGGCGTCGTTA      | GCCACTACACTATTACTCGACC   | chr1:95285531-95285641    |
| DNAJC15_1       | ACGAGGTTTTATTATGTCGGTT   | CGAATACGATAACTACGCTA     | chr13:43597084-43597174   |
| EGFR_74891      | GATTTTCGAGAGGGTTTCGTAG   | CCGAACCTTAAAACCAACGTC    | chr7:55086203-55086306    |
| SPINT2_23336    | TTTGCCTTTGCGTTTTAGTTC    | GCTATTAAAACGACTCCCG      | chr19:38755119-38755208   |
| HTATIP2_82372   | TACGGTATTTTCGTTTCGGT     | CCGCCCTACTCTACTACGTC     | chr11:20385406-20385521   |
| NAB2_83179      | CGTGGCGGTATAGAACGAT      | CCGAAATAACCGAAACCCG      | chr12:57482521-57482601   |
| DSC3_52537      | TTTACGTTTTTCGTTTGTTC     | TACATTAATAACACCGCGCA     | chr18:28622958-28623078   |
| FOXE1_13314     | TTTGTTCGTTTTTCGATTGTTTC  | TAACGCTAAAACCTCCTACCCG   | chr9:100615353-100615448  |
| DIRAS3_9259     | CGTAGTTTTAATGTATTCGTCGT  | TTTCCAATACGCTACGCTCT     | chr1:68517353-68517455    |
| ZIM2_82923      | TAGTTCGGGTTGTTGCGTT      | CTAATACCCCGATTTACTACGA   | chr19:57351593-57351711   |
| PRDX2_83202     | TTGTTATTAGTATTTACGAGCGAG | GCAAACCTAATCGCCCGAC      | chr19:12912285-12912403   |
| CTDSPL_23803    | GGTGGGTGTTTTCGGTTCC      | ACCCATATCGAACCCCGCT      | chr3:37903189-37903288    |
| SYCP3           | TGTATTCGTAATTCGTTTCGGC   | CAAAACGCAACGTAACATAAACG  | chr12:102133313-102133421 |
| HPGD_82367      | GAGGTTTTGAGTCGGTTTTGC    | GACTATATCACCTACCCCTAAACG | chr4:175443763-175443849  |
| CDKN1C_83412    | ATTGGGAAGTTTTACGGGC      | CTCCTCTCGCTACCCGC        | chr11:2906651-2906757     |
| NQO1_82535      | ATTTTGGTCGGAATTAGGTTTTTC | AATACCTGCTACACTACACGCG   | chr16:69760395-69760480   |

| Name           | Forward primer             | Reverse primer            | Genomic location          |
|----------------|----------------------------|---------------------------|---------------------------|
| IGFBP3_RadRes  | ATGCGAGTATTGCGGTTGGGC      | CCTACAACCGAAACACGCTACT    | chr7:45960743-45960869    |
| EGFR_23302     | TAGGAGCGTTGTTTCGGTC        | CACGACCCCTAACTCCGT        | chr7:55086905-55087006    |
| TPM2_83253     | CGGTTTTATCGTTTTGCGG        | TCGACCTACTCGACGGCAT       | chr9:35689737-35689857    |
| SLC4A11_82709  | AGTTTCGTTTTGTTTTATTTTCGAGT | AAAACCTACTATCGCCGTCT      | chr20:3219429-3219526     |
| TNFSF9_82827   | GGGGTACGTTTTATTTGTCGT      | GTATCCGAAACTCGCGCCT       | chr19:6531209-6531328     |
| CEPBD_GT_2     | ATTTTCGAGGAGAGTAGCGAGA     | AAAACCAACCGTAAAAACAACGA   | chr8:48651275-48651384    |
| CDKN2B_27345   | TTAGAAGTAATTTAGGCGCGTTC    | AAACCCCGTACAATAACCGA      | chr9:22009111-22009201    |
| EOMES_82240    | AAGTAGTTAGTTGTCGTTTTGCGTT  | CGAATAAAAAATACGCGCCA      | chr3:27763722-27763818    |
| F2R_74866      | AGAGATTTTTATTGTACGTCGGAG   | AACGATTAACGAAACGAAACGA    | chr5:76011867-76011957    |
| NPY_18473      | AAGTAGGATCGGGTATTGTTC      | GCGTAAACGAAACAAACGCA      | chr7:24323503-24323588    |
| ID4_56956      | GTTATTTAGGTTGTGGTCTGTTTC   | ACGATAAACCCGATACGCC       | chr6:19837991-19838096    |
| DBC1_23888     | TTTTGGATGTTCTGTCGGTAT      | CCCGAATAAACTAAAACTAAACCG  | chr9:122131953-122132039  |
| SLC4A11_82719  | TTCGGGTTATACGGGGGTC        | CAACGACTCTAACTTCCAAACGA   | chr20:3218744-3218824     |
| TRIM59_82865   | GTTTGGAAAAGTGGCGTTC        | GAATCCGAACTTAAAACTACCG    | chr3:160117628-160117746  |
| PCSK6_56483    | ATAGGATTGCGGAGGCGTT        | ACCAATAAATACGACCGACC      | chr15:102029497-102029583 |
| TPM2_82850     | GTTTTTCGAGAGATATTTAATTCGG  | ACGACAACCTCCCGAACGC       | chr3:35690281-35690395    |
| CDKN1C_1       | TTTATAGGTTAAGTGCCTGTGTTTC  | TCCGATAATAAACTCTTCTACGTC  | chr11:2906870-2907006     |
| CEPBD_GT_1     | TATGGAGTCGATGTAGCGGTTG     | CTTCTACGAACCGAACCGAAC     | chr8:48650478-48650614    |
| PRDX2_82604    | GGTATAAAAGTTTCGCGGT        | AAAAACTAAACGCACGAACGA     | chr19:12912563-12912647   |
| RPRM_1         | CGGGTTGTTTTAGTTTCGTT       | TCTTCTAAAACCGTCCGCTC      | chr2:154335270-154335365  |
| FBXO2_83916    | CGTGAAGTTTGTGCGGTT         | CTAAACCGCTCGCTACGAC       | chr1:11714253-11714364    |
| ADAMTS5_82116  | CGGAGTTTGGAAATTTTTATAGTCG  | CACCGAACTAACAACTAATACGC   | chr21:28339098-28339179   |
| EDNRB_3        | TCGGGTTATATGGTCCGT         | AAAAACAATCCTCTCCGAAA      | chr13:78493861-78493977   |
| RBP4_24108     | GATTTTGAAGGTAGACGGAGGC     | TAACCTACAAAACGAAAACGA     | chr10:95361343-95361443   |
| TNFAIP2_83961  | TAGCGGAGTTCGAGGACGTA       | GAATAACCGCAACCCCGT        | chr14:103592969-103593088 |
| NNAT_82085     | GAATTTAGCGGTTAGTGGC        | TTACCTACAACAACACGCGAA     | chr20:36149728-36149809   |
| DMRTB1_12825   | CGCGGTTTTATTTAGCGT         | ATACGCCACATTTTATCGACC     | chr1:53925051-53925149    |
| PENK_18538     | ATTTAGGTTATTACGGGTTTCGC    | AACTACCTCCGACCCACCG       | chr8:57358226-57358311    |
| ID4_56952      | GCGAGTAGGGTTTAGGCGTT       | AAAACCTACGAAAATATACGACCGA | chr6:19837124-19837214    |
| RARB_60785     | CGATGATAGGTGGAAAGAGTAACG   | GAACATAACCACCAACGACC      | chr3:25215883-25215988    |
| DMRTB1_83381   | CGCGTAGAAGGTGTTTTAAGACGTAG | CGAAAACGAAAACGACGACC      | chr1:53925051-53925388    |
| SLC25A31_82698 | TTTATTTATGTTTTGTATCGCGTTT  | ACGATAACGCCCATCGAAC       | chr4:128651808-128651903  |
| INH1A_13228    | TGGAGTTAGGCGGTTGTTTC       | GATTCGCCACCCCTCGTTA       | chr2:220437254-220437384  |
| IGFBP1_82385   | ATATTTAGTTTTAGCGTGCGG      | ACGATAACCGATACTCGCTA      | chr7:45927987-45928098    |
| DAZL_22631     | GTTATTTAGTAGCGCGAGG        | AAATTCGTAAAAACCTCAACGTAA  | chr3:16646022-16646131    |
| PDLIM4_60076   | ATGGGTCGTAGGTGTGTTAGTC     | AAACGATACTCCAACCCGAAA     | chr5:131592952-131593057  |
| HLA-B_82358    | GTTTTAGGTTTCGGACGGG        | AAAAATCCCCAACGCTACG       | chr6:31325123-31325207    |
| CCNA1_83097    | GTTATGGCGATGCGGTTTTC       | ATCGACCAATCAACGACGC       | chr13:37006314-37006406   |
| RAMP3_82633    | TAGTCGCGTTTTTAGCGGG        | AAAAATACGAAACGCGCA        | chr7:45197376-45197462    |
| ZIM2_82925     | GGTAATCGTAGTTTGATTGGTACG   | AACTTCTCCGAAAAACGA        | chr19:57352125-57352234   |
| FAS_18144      | GTGTTTTCGTGTAGTGTTCGTTT    | TCGTCTCTAATCTCGCGCA       | chr10:90750397-90750517   |
| AHR_82118      | TTTTGTATTTAGTCGCGTGCG      | TAACGATCCGAAACACGCT       | chr7:17338238-17338330    |
| S100A6_83934   | TTGTCGATTTACGTTGTTACGAAG   | CCACTACACGCCTAATAACGA     | chr1:153508676-153508760  |
| EPHB2_54970    | CGGTGTTTTTCGTTTTATC        | CTACTACTACTACCGCTACTCGCC  | chr1:23037502-23037583    |
| TNFRSF10A_9277 | CGTTGGGATTAAGTGGTAAAAAC    | CCTCTATAACCGCCCTTACCG     | chr8:23082710-23082811    |
| LATS2_82419    | ATTTATTGTTGGTGCAGGTTTTTC   | AAAACGCAAAACTCCGTCC       | chr13:21635316-21635397   |
| MYO18B_24620   | GAAAGTCCGGATTTGTTTTTC      | ACCATCTCATCACGCCCTCG      | chr22:26157062-26157175   |
| DPP4_24687     | TTCGGGTTTCGATTTTTGC        | ACACTAACATCCCGACCGA       | chr2:162930720-162930815  |
| CSRP1_12558    | TTTTTAGGTTTCGGGAAGGTC      | GATAACGACGACAAAACGCA      | chr1:201476383-201476493  |
| RARB_60784     | GAGAGGTAGGTAGCGAGCGTAT     | ACCAAAACCAACGTCGCCGACT    | chr3:25469475-25469591    |
| NADK_83183     | TCGACGGATAGTTTTCGAGG       | CACGATATAAACCGAACCGAA     | chr1:1710393-1710476      |
| GREM1_29777    | GAATTTGGTACGATTTTACGGAG    | ATCTAAACTTTCCCTATCGACCG   | chr15:33009752-33009860   |
| ADAM23_A       | GAGGTTTTAAGTTGGCGGAGC      | ACTCGAAACTAAACGACGCC      | chr2:207308329-207308441  |
| MRC2_82455     | TTCGATTCGAGGAGGAC          | ACGCTCAATAAACCGCAAA       | chr17:60705039-60705152   |
| RARRS1_57577   | GTCGTTTGTGTTAGGAGTTTGC     | CTACTACTATTACTCGCCCGAT    | chr3:158450013-158450123  |
| CAV1_58524     | TTCGTTAAAGGTTTGTGTTTC      | TCTCTACTCGCTACGAACGCT     | chr7:116164859-116164973  |
| CRBP_1         | TGGGGAATTTAGTTGTCGTCGTTTTC | AAACAACGACTACCGATACTACGCG | chr3:139258429-139258529  |
| SPINT2_23333   | GAGGGTCGTTGAGTGTCTGATG     | CTTCAATATAAAAAACGCCCCGA   | chr19:38755270-38755363   |
| CYP1A1_23831   | TATTCGTGGTGGTGTGAGC        | AAAATATAAAAAACGAAACCGACC  | chr15:75015103-75015197   |
| WNT5A_65596    | CGAGTAGGAAGGAGGTAGCGTT     | AAATCCTATACGCGAAACACG     | chr3:55515157-55515251    |
| SLC25A31_82696 | GATGAGGCGTTAAATAGTCGTTT    | CTTTCATCGTAACTCCCGT       | chr4:128651636-128651756  |
| ZBTB25_83276   | TATTAGATACGCGGTTACGTGG     | ATAACGCCGACTCACGCAC       | chr14:64970452-64970543   |
| MORN1_83171    | TTTTAGAGATTGCGCGGGT        | TTAACGACCAACAACGCC        | chr1:2322991-2323083      |
| TSHR_83270     | AGTTTGCATTTGGGCGGT         | ATTCGTCTCCACCCTACGA       | chr14:81422094-81422191   |
| ESR1_2         | CGGGAGTTTAGGAGTTGGC        | CTACCCGAAAACCTACGA        | chr6:152128804-152128901  |
| TCEB3_83953    | TCGCGTTAGTGATAGCGATG       | CGCTTACCTTCTTAAAAACCGAA   | chr1:24069976-24070075    |
| MAL_74692      | GGTAGGGTGTGTTTTTCGTC       | AAAATCTACGCGAAATCTAAACG   | chr2:95691475-95691575    |
| HCRT2_82338    | GAGTTTTAGTTGAGTCCGACGTAG   | TCTTTACAAACGATATTACCCGAA  | chr6:55039076-55039193    |
| ATM_9746       | TTTAAATATAAGTCGGGTTACGTTCC | ATACGACGCAAAACTATCGC      | chr11:108093225-108093342 |
| EMP3_82232     | ATTTGTGAAATTCGGTAGGGC      | CTCAAAATATCTACCCGTCTCG    | chr19:48828134-48828216   |
| RUNX3_2        | TATTTATTTGAAGGCGACGG       | TAACGAACACGCAAAACGA       | chr1:25256070-25256184    |
| CTGF_31218     | TCGTTGAGAGGAGATAGTTAGTGC   | GATAACTCGAAAATAAAACCGAA   | chr6:132272383-132272496  |
| GPR50_82319    | TATTTTATGTTTTGCGCGATG      | TTCCGAAACTCTTATTTCTCGT    | chrX:150345276-150345375  |
| TMEFF2_8421    | CGGGGAAGTAGTAGTTAAATTCG    | GCAACTTCTCAACGAACGACC     | chr2:193059381-193059484  |
| NNAT_83189     | TTTTAGTGCCTTCGCGTTT        | ATAACGAATTTTTCTTACCCGCT   | chr20:36149997-36150108   |
| MAGEB2_71596   | CGTTAGAATAGTGACGTTCCGGT    | GAAAATCAAATAACTCACATCCG   | chrX:30233556-30233639    |
| MSH4_27679     | TGTTGTTTCGCTCGTTCTGATG     | AAAATCCCGCTACAATTTTCG     | chr1:76262749-76262866    |
| TEX14_56176    | TTGTGGGTTAGTTTTAACGGTC     | CGAAATACGACTCCCGAAA       | chr17:56769364-56769449   |
| TRIM59_82871   | GATTTTTCGGAGTAGCGGG        | ATCTTTTACTTAAACGCCACACGA  | chr3:160168002-160168100  |
| NF2_61304      | TTTTTGGGGCGTTATATTCGG      | CACCTAAAACTAAATCCGAAACG   | chr22:29999128-29999228   |
| PCDH20_23326   | ATATTTGTAATTTGTCGGGTC      | AAATATAAACGCTACATCGTCC    | chr13:61989111-61989214   |

| Name            | Forward primer            | Reverse primer             | Genomic location          |
|-----------------|---------------------------|----------------------------|---------------------------|
| GREM1_29775     | AGGTTTTGTATGTGACGGAGC     | ACGACTATTACACCTTCCTCGT     | chr15:33023126-33023224   |
| CASP8U_1        | TAGGGGATTTGGAGATTGTGA     | CCATATATCTACATTCAAACAA     | chr2:202123060-202123381  |
| CTCF_L_23794    | TTTTTATTTTCGCGTTAGTTTCG   | ATACTCGACCCACTCCGTCT       | chr20:56100102-56100201   |
| HCRTR2_82341    | CGAAGTAGATGATTAGTTGCGATA  | TTACAACATTAACGAAACCGAA     | chr6:55039350-55039442    |
| SST_83224       | AGGTAGTAGCGATGGTTTCG      | AAAACGCCTCCTAACCTAACGTC    | chr3:187388135-187388242  |
| PCSK6_56480     | TCGGGTGCTTTAGTATTGTATC    | CTAACGCTACCTACCGCCT        | chr15:102029628-102029711 |
| CYGB_17997      | TCGTAGTTGGTATAGAGTCGGG    | CGAAATAAAAAATCGAACGCA      | chr17:74533508-74533607   |
| F2R_31099       | TTTCGTTTCGCGTATTTTATTTTC  | ACTTCAATCTATACGACCCGCT     | chr5:76012166-76012256    |
| TADA3L_82757    | GATAAGTCGAAGCGGACGA       | CGAACGCCAAAAACTACGA        | chr3:9834370-9834461      |
| WNT5A_83273     | TTCGCGTATAGGATTTAGCG      | AACTACGCTTCTCCTCCGT        | chr3:55515053-55515173    |
| TCEB3_83956     | GTTTTTCGTCGTCGGTATTTTC    | GCGATAACCTCATTCCGTCT       | chr1:24069633-24069732    |
| TNFRSF10C_9283  | TTATAGTAGCGTAGTGGGTAGCGT  | CGAACAAAAACTAACTCTTTCCG    | chr8:22960155-22960279    |
| DIRAS3_9258     | GCGTATTATCGTTTATCGAGCG    | ACCAAATACTACCGTCAACGACT    | chr1:68517452-68517557    |
| THBD_82802      | GTCGATTTAGAGCGCTCGG       | GAAACCACCTAATAACAATACGCT   | chr20:23029874-23029975   |
| TADA3L_82759    | TACGGAAGTGGTTAGTTTCGC     | GTAAAACTCTCTACCCCGCTC      | chr3:9834659-9834774      |
| DAZL_18008      | GTCGGGAATTGTTGTTTTC       | ACCGAATTTACCCACGAA         | chr3:16646644-16646738    |
| SLIT3_23622     | TATTGAATGGAGAGAGCGAGC     | ATAAACGTAACGCCGAAA         | chr5:168728027-168728144  |
| ESR2_74878      | CGTAGGTGTGTATAAAGTCGG     | CTACGCCAAAAACGTAACGAAC     | chr14:64805138-64805227   |
| MYST4_83331     | TTATCGAAGGAGTTGGCGA       | AAAAATAAACGCGAACGAAC       | chr10:76585748-76585829   |
| VASH1_83272     | TTAATTGCGAGAATAATGACGG    | TCTACAACCGCTAATCCGAAC      | chr8:22960155-22960279    |
| SOCS3_53605     | TTTAGGGGAAGTTTCGAGGGAC    | ACGACGAAACGACCAACGATA      | chr17:76355893-76355995   |
| XYLB_65485      | GTTAGGCGATTGATTTGTTGC     | TTACCCGAAAAACATAACGA       | chr3:38388345-38388431    |
| FABP5_82271     | GTAGAGGCGTCGAAACGTG       | CCTCTTACCAAAATACGCGAC      | chr8:82192511-82192622    |
| TBX3_82767      | TCGGTTTCGTTTTCGTTTC       | GCTCTAATTC AACCCACGTCT     | chr12:115122304-115122424 |
| HOXA9_2         | GTTGCGGAGAAAGATACGAG      | CGAACGAAACATCACGACC        | chr7:27208970-27209060    |
| DLC1_83387      | TGGAGAAATTAACGGGGACG      | CAACGAAAAACTAAAACGCCA      | chr8:13372115-13372196    |
| XYLB_65481      | CGGAGATGTTTTGTTAATGTTATTC | TAAACACCGAAAACTCCTACCGA    | chr3:38388345-38388708    |
| FABP3_83914     | CGTGGGTATTAGTTTAAAGGGCGT  | GCATACCATAATAAATATCTTCCCG  | chr1:31846228-31846333    |
| PCDH10_83191    | GTTAGCGTTTCGGGATTTGC      | ACCGCAAACAAACACGTC         | chr4:134070224-134070344  |
| FABP3_83912     | GATGCGGTAGGAGTGTTC        | CGATAAACAAACCGCGAAA        | chr1:31845705-31845790    |
| PCDH6_82558     | TATAATTTGTTGGCGACGATT     | ACTCTACAAACTCGATAAACTCCGT  | chr5:140529614-140529733  |
| FBN2_18151      | TTGGAGATTTTCGATAGAGCGT    | AAACTACCGACTACACCTCCG      | chr5:127873440-127873551  |
| HTATIP2_82369   | TGTTAGGAGTTTCGTTTTAGTTTC  | GACTTAATCTTCCGAATAACCTCG   | chr11:20385212-20385293   |
| FBXO2_83919     | CGTTTCGGTTTCGTTAGTTTC     | TACGACGCGATAAAAAACGTC      | chr1:11714840-11714926    |
| ESR2_55656      | TGAGTTGTAGGAGGTGCGTTC     | AACACGTAATTTTCCCGCAT       | chr14:64760791-64760881   |
| TNFRSF10B_22599 | TATAAATTAGTACGCGGTCGGAG   | CCTTAAATAAATCGAACATCGTC    | chr8:22926454-22926534    |
| DUSP6_18077     | AATTTGTTTTAGTCGGTTCGTTT   | ACGTCTCAATAAATACATTCTCCG   | chr12:89746289-89746378   |
| BCL2_17881      | AATGAATTAGGAGTCGCGG       | AAATCTCCGATTAATAATCTCCTACG | chr18:60986532-60986645   |
| CTGF_31220      | TCGGAGCGTATAAAAGTTTCGG    | GCACTAACTATCTCCTCAACGA     | chr6:132272472-132272552  |
| CXCR4_70043     | CGGGAGTGTAGAAAAATGAATAAAC | GCGCCAAATAATAAACACGAA      | chr2:136874129-136874228  |
| EPHB2_62234     | TAGTCGCGTTAGACGTTTTTC     | AACAATAATCTCTCCGACGC       | chr1:23036966-23037079    |
| DPP4_74913      | TGGCGAAGAGGTTTTATAGTTC    | TACGCTCCTTCTTAAACGCTC      | chr2:162930431-162930534  |
| DBC1_23879      | AGGATAGGTATGAATTTTCGTTTTC | AAACGAACGAAACAACGA         | chr9:122131521-122131614  |
| TNFRSF10B_2     | CGTAGTCGTTAGGGCGAAG       | TAAATAAAAAATCTCGTCAACGCA   | chr8:22926654-22926750    |
| EDNRB_1         | CGTTTTAGTTAAGCGTGCCTG     | CGAAATATAAAAAATTTCCCTACGA  | chr13:78493099-78493204   |
| CRBP_2          | TTTTAGCGCGTATAAAGTTTTC    | GACCTAAACAACCTAACCTTCG     | chr3:139258523-139258635  |
| PENK_18533      | GGGATCGTCGAGTAAAAGTTC     | ATCTAAATCGCCTCCACGCTCT     | chr8:57358604-57358698    |
| BCL2_17882      | GATAGAGATTTATGTTTGTGTTCCG | TTTCAATCCGATATTCGCAA       | chr18:60986696-60986793   |
| KRAS_24235      | AGGAGGGATTGTCGGATTTAC     | GCTCCGAATCAAAATTAACGA      | chr12:25404163-25404248   |

| Rank         | 1               | 2           | 3          | 4         | 5           | 6           | 7         | 8            | 9           | 10         | 11         | 12        | 13          | 14         | 15          | 16       | 17          |
|--------------|-----------------|-------------|------------|-----------|-------------|-------------|-----------|--------------|-------------|------------|------------|-----------|-------------|------------|-------------|----------|-------------|
| Assay        | TNFRSF10D_23780 | CXCR4_70046 | FBN2_18150 | NPY_18477 | SOCS3_53602 | FABP5_82270 | MAL_74689 | CDKN2B_27347 | MYST4_82478 | CYGB_83388 | HPGD_82365 | FAS_18143 | TMEFF2_8419 | DSC3_52537 | VASH1_83272 | CASP8M_1 | NPTX2_57773 |
| sens HR-DOD  | 64%             | 45%         | 36%        | 36%       | 36%         | 36%         | 36%       | 27%          | 27%         | 18%        | 18%        | 18%       | 18%         | 18%        | 18%         | 9%       | 9%          |
| spec LR-SURV | 100%            | 100%        | 100%       | 100%      | 100%        | 100%        | 100%      | 100%         | 100%        | 100%       | 100%       | 100%      | 100%        | 100%       | 100%        | 100%     | 100%        |

|                                 |     |      |  |  |  |  |  |  |  |  |  |  |  |  |  |  |  |
|---------------------------------|-----|------|--|--|--|--|--|--|--|--|--|--|--|--|--|--|--|
| H<br>R<br>-<br>D<br>O<br>D      | 1   | 589  |  |  |  |  |  |  |  |  |  |  |  |  |  |  |  |
|                                 | 1   | 389  |  |  |  |  |  |  |  |  |  |  |  |  |  |  |  |
|                                 |     | 7    |  |  |  |  |  |  |  |  |  |  |  |  |  |  |  |
|                                 |     | 911  |  |  |  |  |  |  |  |  |  |  |  |  |  |  |  |
|                                 |     | N432 |  |  |  |  |  |  |  |  |  |  |  |  |  |  |  |
|                                 |     | 811  |  |  |  |  |  |  |  |  |  |  |  |  |  |  |  |
|                                 |     | 499  |  |  |  |  |  |  |  |  |  |  |  |  |  |  |  |
|                                 |     | 857  |  |  |  |  |  |  |  |  |  |  |  |  |  |  |  |
|                                 |     | N159 |  |  |  |  |  |  |  |  |  |  |  |  |  |  |  |
|                                 |     | 3    |  |  |  |  |  |  |  |  |  |  |  |  |  |  |  |
|                                 | 498 |      |  |  |  |  |  |  |  |  |  |  |  |  |  |  |  |
| L<br>R<br>-<br>S<br>U<br>R<br>V | 9   | 510  |  |  |  |  |  |  |  |  |  |  |  |  |  |  |  |
|                                 |     | 711  |  |  |  |  |  |  |  |  |  |  |  |  |  |  |  |
|                                 |     | 278  |  |  |  |  |  |  |  |  |  |  |  |  |  |  |  |
|                                 |     | 774  |  |  |  |  |  |  |  |  |  |  |  |  |  |  |  |
|                                 |     | 1383 |  |  |  |  |  |  |  |  |  |  |  |  |  |  |  |
|                                 |     | 397  |  |  |  |  |  |  |  |  |  |  |  |  |  |  |  |
|                                 |     | 518  |  |  |  |  |  |  |  |  |  |  |  |  |  |  |  |
|                                 |     | 58   |  |  |  |  |  |  |  |  |  |  |  |  |  |  |  |
|                                 | 824 |      |  |  |  |  |  |  |  |  |  |  |  |  |  |  |  |

methylated  
unmethylated

| Rank         | 18         | 19           | 20      | 21         | 22       | 23           | 24            | 25           | 26          | 27            | 28          | 29         | 30           | 31              | 32        | 33            | 34          |
|--------------|------------|--------------|---------|------------|----------|--------------|---------------|--------------|-------------|---------------|-------------|------------|--------------|-----------------|-----------|---------------|-------------|
| Assay        | PPIC_69739 | PCDH10_82547 | GATA4_2 | CEPBD_GT_2 | CASP8U_1 | S100A6_83933 | RARRES1_57581 | CDKN2B_27345 | KRT19_61596 | RARRES1_57577 | CSRP1_12560 | TP73_72009 | TADA3L_82757 | TNFRSF10A_65529 | NF2_23823 | SLC4A11_82709 | KRT19_83159 |
| sens HR-DOD  | 9%         | 9%           | 9%      | 9%         | 9%       | 73%          | 55%           | 55%          | 45%         | 45%           | 36%         | 36%        | 36%          | 64%             | 64%       | 91%           | 55%         |
| spec LR-SURV | 100%       | 100%         | 100%    | 100%       | 100%     | 89%          | 86%           | 86%          | 83%         | 83%           | 80%         | 80%        | 80%          | 78%             | 78%       | 77%           | 75%         |

|                                 |     |      |  |  |  |  |  |  |  |  |  |  |  |  |  |  |  |  |
|---------------------------------|-----|------|--|--|--|--|--|--|--|--|--|--|--|--|--|--|--|--|
| H<br>R<br>-<br>D<br>O<br>D      | 1   | 589  |  |  |  |  |  |  |  |  |  |  |  |  |  |  |  |  |
|                                 | 1   | 389  |  |  |  |  |  |  |  |  |  |  |  |  |  |  |  |  |
|                                 |     | 7    |  |  |  |  |  |  |  |  |  |  |  |  |  |  |  |  |
|                                 |     | 911  |  |  |  |  |  |  |  |  |  |  |  |  |  |  |  |  |
|                                 |     | N432 |  |  |  |  |  |  |  |  |  |  |  |  |  |  |  |  |
|                                 |     | 811  |  |  |  |  |  |  |  |  |  |  |  |  |  |  |  |  |
|                                 |     | 499  |  |  |  |  |  |  |  |  |  |  |  |  |  |  |  |  |
|                                 |     | 857  |  |  |  |  |  |  |  |  |  |  |  |  |  |  |  |  |
|                                 |     | N159 |  |  |  |  |  |  |  |  |  |  |  |  |  |  |  |  |
|                                 |     | 3    |  |  |  |  |  |  |  |  |  |  |  |  |  |  |  |  |
|                                 | 498 |      |  |  |  |  |  |  |  |  |  |  |  |  |  |  |  |  |
| L<br>R<br>-<br>S<br>U<br>R<br>V | 9   | 510  |  |  |  |  |  |  |  |  |  |  |  |  |  |  |  |  |
|                                 |     | 711  |  |  |  |  |  |  |  |  |  |  |  |  |  |  |  |  |
|                                 |     | 278  |  |  |  |  |  |  |  |  |  |  |  |  |  |  |  |  |
|                                 |     | 774  |  |  |  |  |  |  |  |  |  |  |  |  |  |  |  |  |
|                                 |     | 1383 |  |  |  |  |  |  |  |  |  |  |  |  |  |  |  |  |
|                                 |     | 397  |  |  |  |  |  |  |  |  |  |  |  |  |  |  |  |  |
|                                 |     | 518  |  |  |  |  |  |  |  |  |  |  |  |  |  |  |  |  |
|                                 |     | 58   |  |  |  |  |  |  |  |  |  |  |  |  |  |  |  |  |
|                                 |     | 824  |  |  |  |  |  |  |  |  |  |  |  |  |  |  |  |  |

methylated  
unmethylated

| Rank         | 35         | 36         | 37         | 38        | 39           | 40          | 41           | 42         | 43           | 44         | 45           | 46       | 47         | 48         | 49           | 50         | 51        |
|--------------|------------|------------|------------|-----------|--------------|-------------|--------------|------------|--------------|------------|--------------|----------|------------|------------|--------------|------------|-----------|
| Assay        | NADK_83330 | THBD_82800 | NQO1_82535 | NF2_61304 | PCDHB6_82558 | GATA4_13295 | IGFBP1_82382 | NAB2_83179 | CDKN1C_83412 | EGFR_23302 | CTDSPL_23804 | PDLIM4_4 | RBP1_83281 | CTCF_23792 | IGFBP3_54583 | HPGD_82367 | MAL_74692 |
| sens HR-DOD  | 27%        | 27%        | 27%        | 27%       | 27%          | 73%         | 73%          | 73%        | 73%          | 73%        | 91%          | 45%      | 45%        | 45%        | 45%          | 64%        | 64%       |
| spec LR-SURV | 75%        | 75%        | 75%        | 75%       | 75%          | 73%         | 73%          | 73%        | 73%          | 73%        | 71%          | 71%      | 71%        | 71%        | 71%          | 70%        | 70%       |

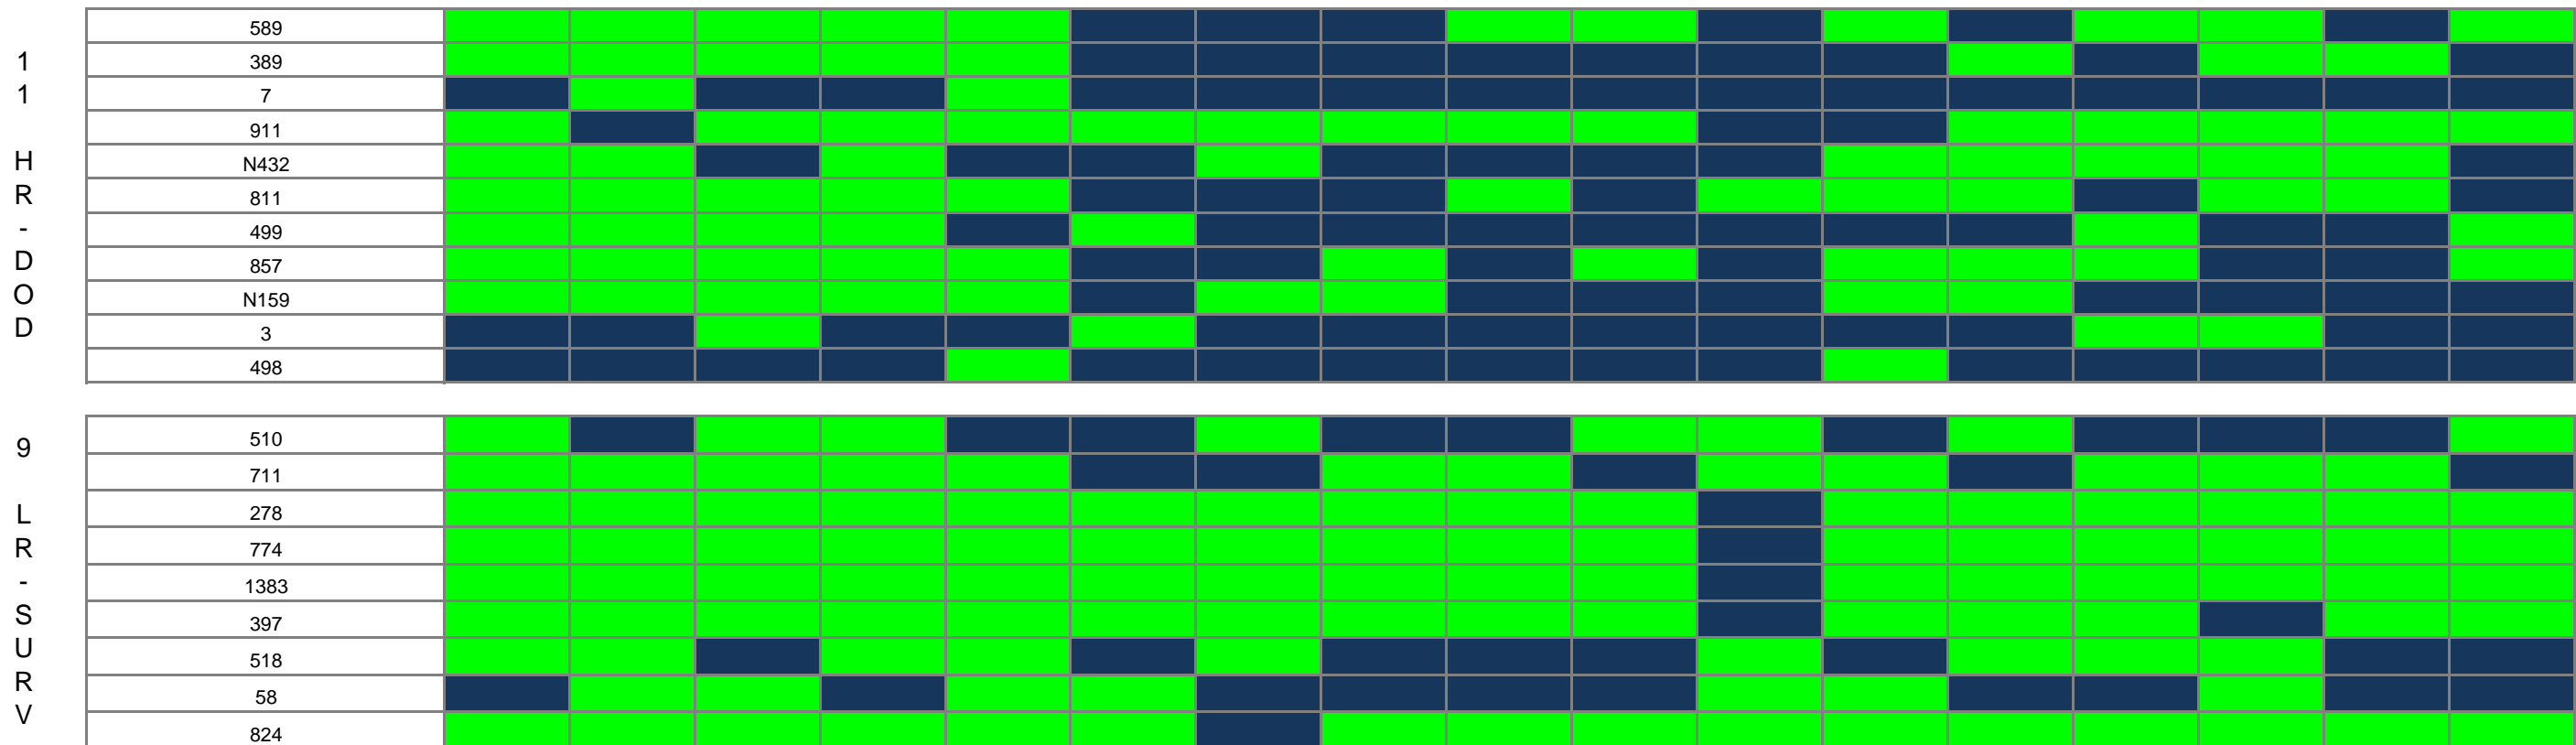

methylated  
unmethylated



| Rank         | 52          | 53        | 54         | 55         | 56         | 57          | 58          | 59      | 60         | 61        | 62          | 63           | 64        | 65          | 66         | 67           | 68        |
|--------------|-------------|-----------|------------|------------|------------|-------------|-------------|---------|------------|-----------|-------------|--------------|-----------|-------------|------------|--------------|-----------|
| Assay        | EOMES_82239 | DLC1_9164 | PPIC_69743 | EGFR_74891 | INHA_13228 | LATS2_82421 | SLIT3_23619 | CCNA1_1 | TBX3_83233 | F2R_74866 | HOXA9_77983 | TNFSF9_30093 | F2R_31099 | SOCS3_53605 | NAB2_69824 | ADAM23_66271 | NPY_18473 |
| sens HR-DOD  | 82%         | 82%       | 82%        | 91%        | 91%        | 73%         | 73%         | 73%     | 55%        | 55%       | 36%         | 36%          | 36%       | 36%         | 18%        | 18%          | 18%       |
| spec LR-SURV | 69%         | 69%       | 69%        | 67%        | 67%        | 67%         | 67%         | 67%     | 67%        | 67%       | 67%         | 67%          | 67%       | 67%         | 67%        | 67%          | 67%       |

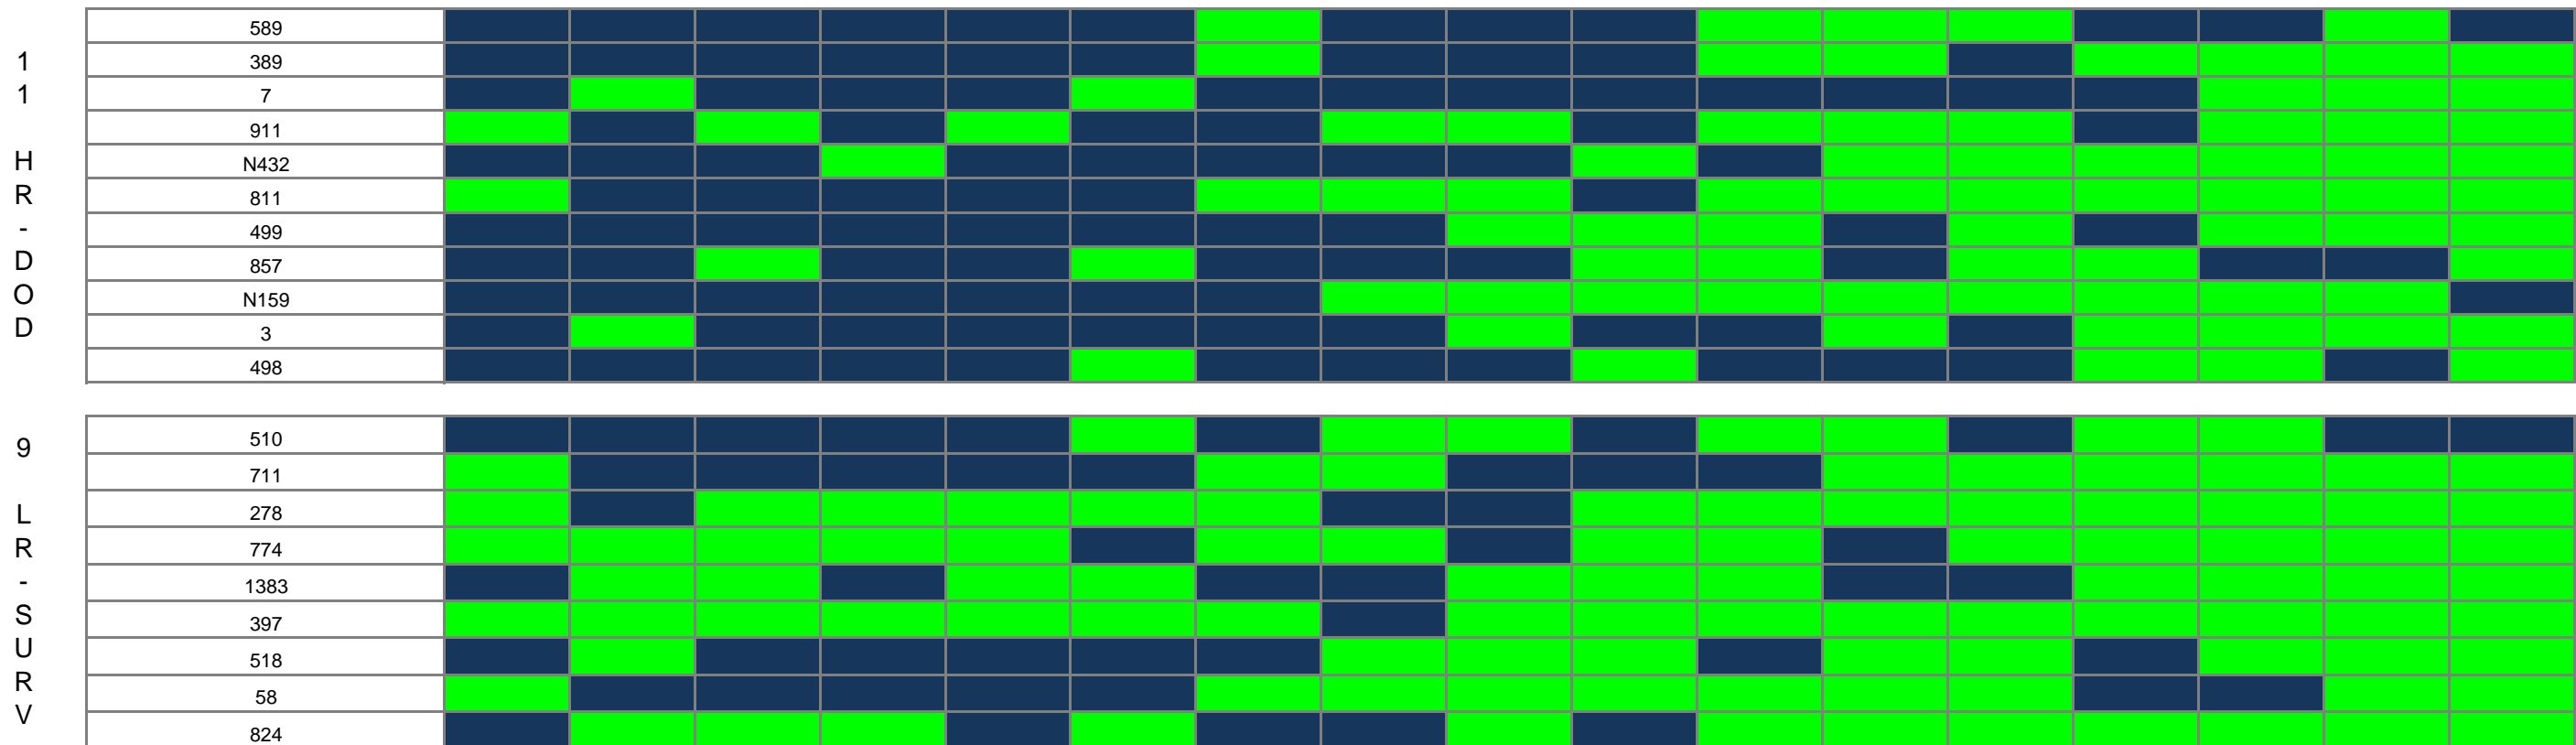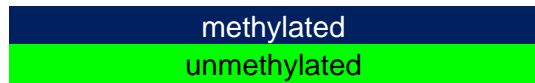



| Rank         | 86         | 87        | 88           | 89            | 90           | 91         | 92          | 93          | 94          | 95          | 96            | 97    | 98         | 99            | 100        | 101         | 102         |
|--------------|------------|-----------|--------------|---------------|--------------|------------|-------------|-------------|-------------|-------------|---------------|-------|------------|---------------|------------|-------------|-------------|
| Assay        | NQO1_52551 | DNAJC15_2 | SPINT2_23336 | ADAMTS5_82116 | MYO18B_24620 | DPP4_24687 | TCEB3_83956 | MORN1_83172 | GREM1_29775 | FOXE1_13317 | HTATIP2_82372 | SYCP3 | TPM2_83253 | TNFAIP2_83961 | NNAT_82085 | LATS2_82419 | DIRAS3_9259 |
| sens HR-DOD  | 91%        | 91%       | 91%          | 91%           | 91%          | 91%        | 45%         | 73%         | 73%         | 100%        | 100%          | 100%  | 100%       | 100%          | 100%       | 100%        | 82%         |
| spec LR-SURV | 63%        | 63%       | 63%          | 63%           | 63%          | 63%        | 63%         | 62%         | 62%         | 61%         | 61%           | 61%   | 61%        | 61%           | 61%        | 61%         | 60%         |

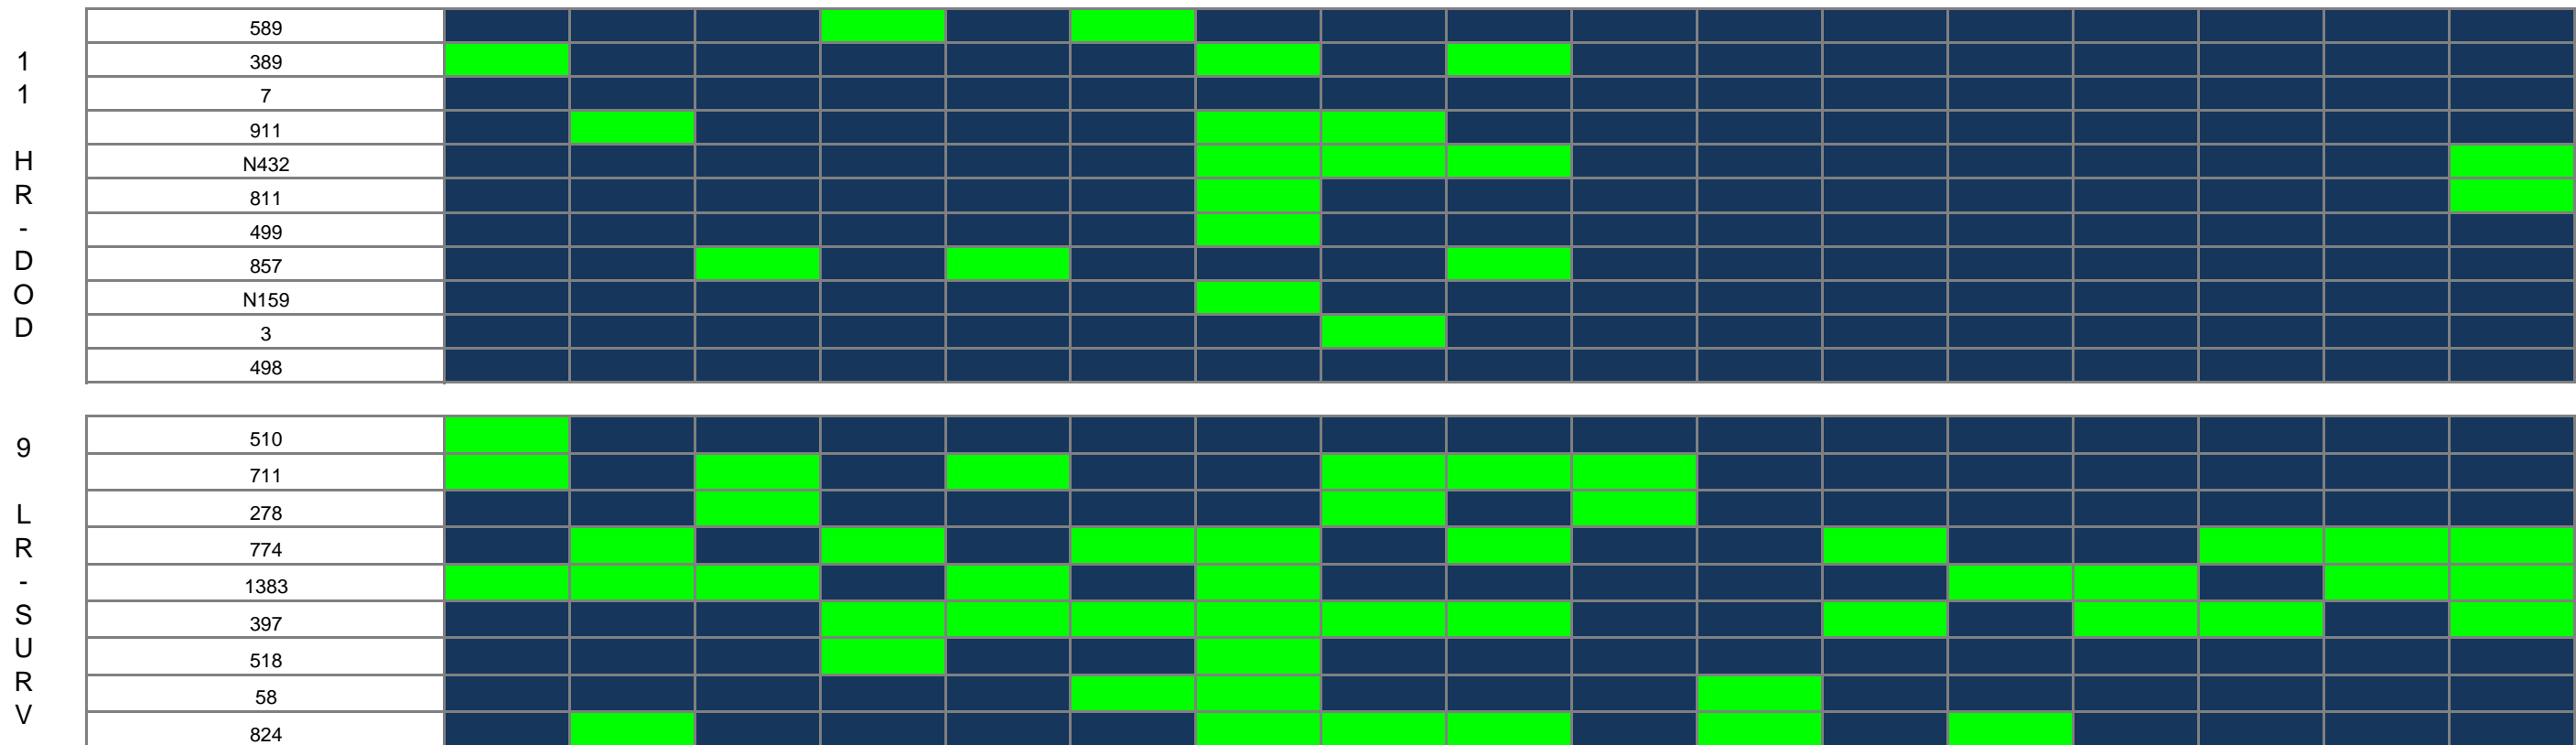

| Rank         | 103        | 104         | 105         | 106         | 107        | 108          | 109       | 110        | 111     | 112             | 113         | 114           | 115        | 116          | 117        | 118          | 119       |
|--------------|------------|-------------|-------------|-------------|------------|--------------|-----------|------------|---------|-----------------|-------------|---------------|------------|--------------|------------|--------------|-----------|
| Assay        | ZIM2_82923 | RAMP3_82633 | GPR50_82319 | PCSK6_56483 | CAV1_58524 | PCDH20_23327 | MRC2_9206 | ESR2_74878 | RASSF1A | TNFRSF10D_23781 | DUSP6_18075 | IGFBP3_RadRes | CEPBD_GT_1 | PDLIM4_60076 | NNAT_83189 | PCDH20_23326 | DNAJC15_1 |
| sens HR-DOD  | 82%        | 82%         | 82%         | 55%         | 55%        | 27%          | 27%       | 27%        | 91%     | 91%             | 91%         | 91%           | 91%        | 91%          | 91%        | 64%          | 100%      |
| spec LR-SURV | 60%        | 60%         | 60%         | 60%         | 60%        | 60%          | 60%       | 60%        | 59%     | 59%             | 59%         | 59%           | 59%        | 59%          | 59%        | 58%          | 58%       |

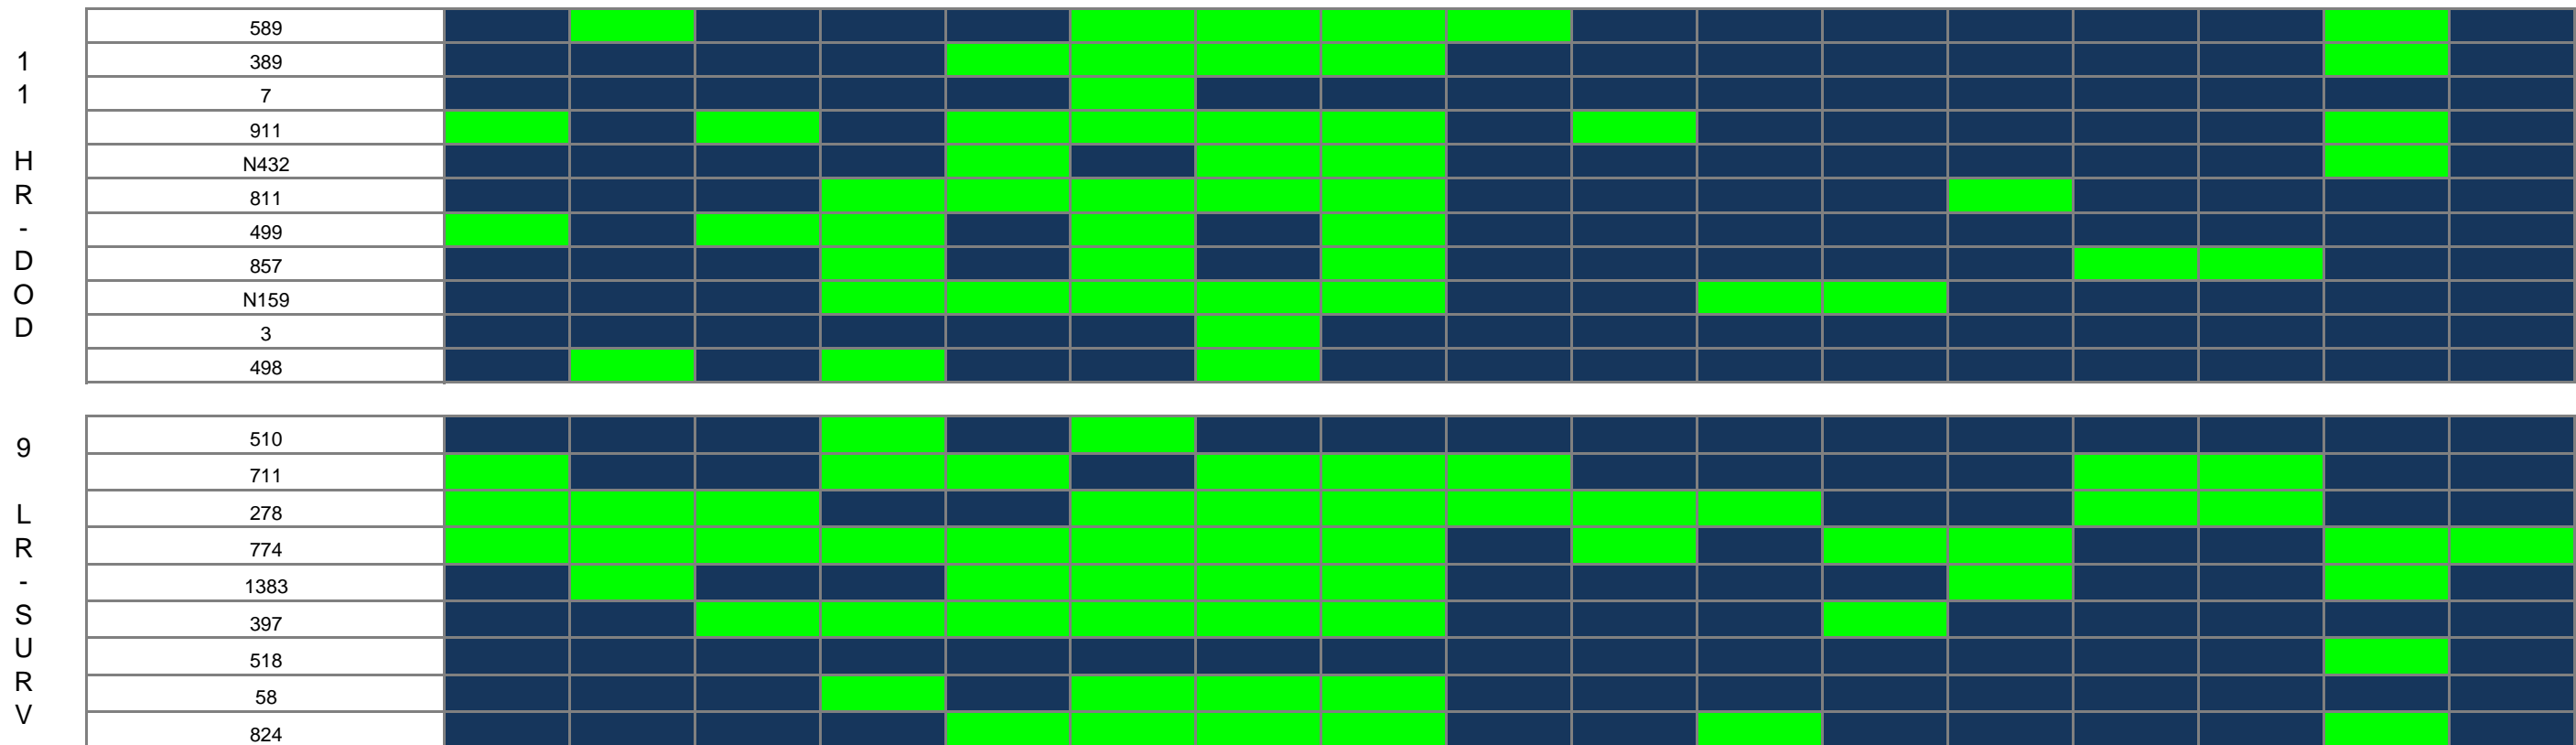

| Rank         | 120          | 121        | 122       | 123        | 124          | 125         | 126         | 127    | 128        | 129          | 130        | 131         | 132     | 133    | 134         | 135         | 136         |
|--------------|--------------|------------|-----------|------------|--------------|-------------|-------------|--------|------------|--------------|------------|-------------|---------|--------|-------------|-------------|-------------|
| Assay        | DMRTB1_12825 | PENK_18538 | ID4_56952 | RARB_60785 | DMRTB1_83381 | CCNA1_83097 | CSRP1_12558 | ESR1_2 | TPM2_82850 | IGFBP1_82385 | CTGF_31218 | TMEFF2_8421 | HOXA9_2 | TP73_1 | PCSK6_56480 | WNT5A_83273 | PRDX2_82604 |
| sens HR-DOD  | 100%         | 100%       | 100%      | 100%       | 100%         | 100%        | 100%        | 100%   | 73%        | 73%          | 73%        | 73%         | 73%     | 36%    | 36%         | 36%         | 82%         |
| spec LR-SURV | 58%          | 58%        | 58%       | 58%        | 58%          | 58%         | 58%         | 58%    | 57%        | 57%          | 57%        | 57%         | 57%     | 57%    | 57%         | 57%         | 56%         |

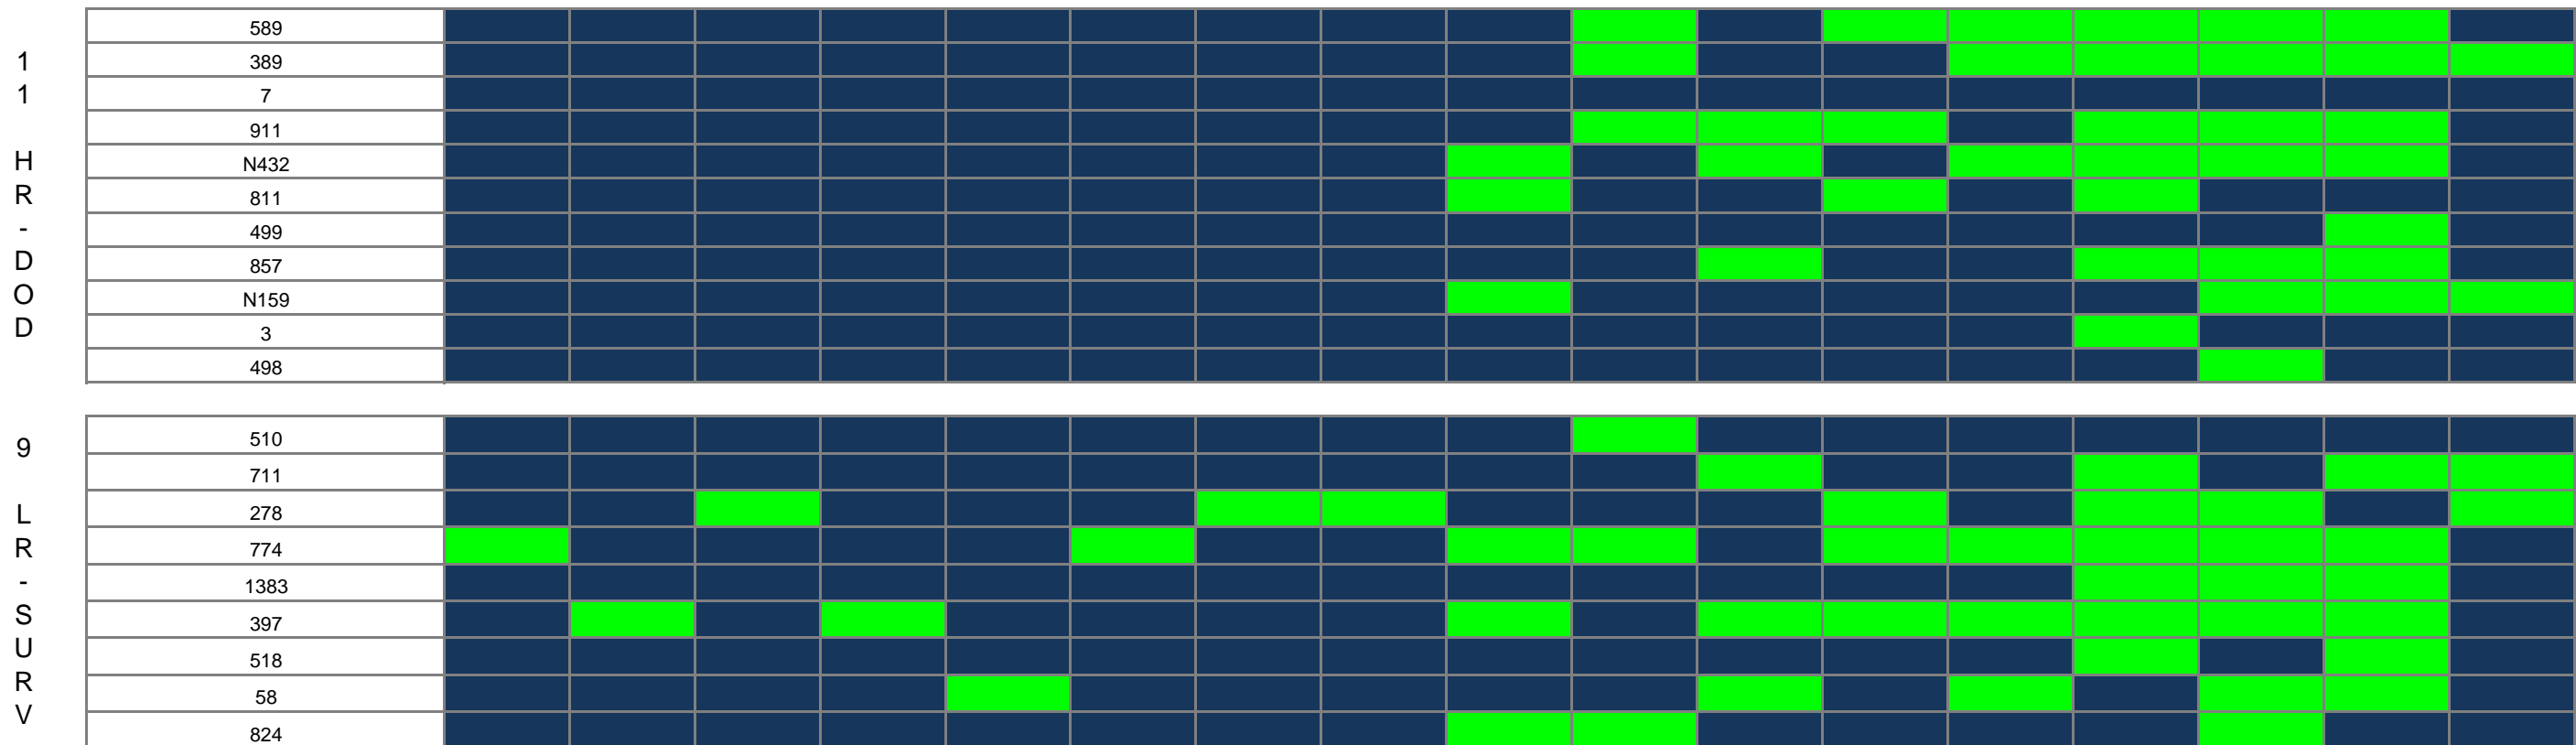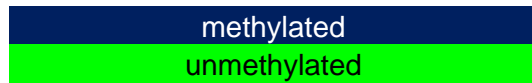

| Rank         | 137        | 138         | 139            | 140        | 141         | 142        | 143         | 144        | 145            | 146         | 147        | 148      | 149    | 150          | 151          | 152         | 153            |
|--------------|------------|-------------|----------------|------------|-------------|------------|-------------|------------|----------------|-------------|------------|----------|--------|--------------|--------------|-------------|----------------|
| Assay        | EMP3_82232 | CTCFL_23794 | TNFRSF10C_9283 | TBX3_82767 | EPHB2_54970 | NADK_83183 | ROBO3_64828 | RBP4_24108 | SLC25A31_82698 | HLA-B_82358 | RARB_60784 | ADAM23_A | CRBP_1 | SPINT2_23333 | CYP1A1_23831 | WNT5A_65596 | SLC25A31_82696 |
| sens HR-DOD  | 82%        | 82%         | 82%            | 82%        | 91%         | 91%        | 45%         | 45%        | 100%           | 100%        | 100%       | 100%     | 100%   | 100%         | 100%         | 100%        | 100%           |
| spec LR-SURV | 56%        | 56%         | 56%            | 56%        | 56%         | 56%        | 56%         | 56%        | 55%            | 55%         | 55%        | 55%      | 55%    | 55%          | 55%          | 55%         | 55%            |

|                                 |     |      |  |  |  |  |  |  |  |  |  |  |  |  |  |  |  |
|---------------------------------|-----|------|--|--|--|--|--|--|--|--|--|--|--|--|--|--|--|
| H<br>R<br>-<br>D<br>O<br>D      | 1   | 589  |  |  |  |  |  |  |  |  |  |  |  |  |  |  |  |
|                                 | 1   | 389  |  |  |  |  |  |  |  |  |  |  |  |  |  |  |  |
|                                 |     | 7    |  |  |  |  |  |  |  |  |  |  |  |  |  |  |  |
|                                 |     | 911  |  |  |  |  |  |  |  |  |  |  |  |  |  |  |  |
|                                 |     | N432 |  |  |  |  |  |  |  |  |  |  |  |  |  |  |  |
|                                 |     | 811  |  |  |  |  |  |  |  |  |  |  |  |  |  |  |  |
|                                 |     | 499  |  |  |  |  |  |  |  |  |  |  |  |  |  |  |  |
|                                 |     | 857  |  |  |  |  |  |  |  |  |  |  |  |  |  |  |  |
|                                 |     | N159 |  |  |  |  |  |  |  |  |  |  |  |  |  |  |  |
|                                 |     | 3    |  |  |  |  |  |  |  |  |  |  |  |  |  |  |  |
|                                 | 498 |      |  |  |  |  |  |  |  |  |  |  |  |  |  |  |  |
| L<br>R<br>-<br>S<br>U<br>R<br>V | 9   | 510  |  |  |  |  |  |  |  |  |  |  |  |  |  |  |  |
|                                 |     | 711  |  |  |  |  |  |  |  |  |  |  |  |  |  |  |  |
|                                 |     | 278  |  |  |  |  |  |  |  |  |  |  |  |  |  |  |  |
|                                 |     | 774  |  |  |  |  |  |  |  |  |  |  |  |  |  |  |  |
|                                 |     | 1383 |  |  |  |  |  |  |  |  |  |  |  |  |  |  |  |
|                                 |     | 397  |  |  |  |  |  |  |  |  |  |  |  |  |  |  |  |
|                                 |     | 518  |  |  |  |  |  |  |  |  |  |  |  |  |  |  |  |
|                                 |     | 58   |  |  |  |  |  |  |  |  |  |  |  |  |  |  |  |
|                                 |     | 824  |  |  |  |  |  |  |  |  |  |  |  |  |  |  |  |

methylated  
unmethylated

| Rank         | 154          | 155         | 156        | 157         | 158          | 159        | 160       | 161       | 162        | 163       | 164         | 165       | 166          | 167        | 168          | 169         | 170         |
|--------------|--------------|-------------|------------|-------------|--------------|------------|-----------|-----------|------------|-----------|-------------|-----------|--------------|------------|--------------|-------------|-------------|
| Assay        | ZBTB25_83276 | MORN1_83171 | TSHR_83270 | TEX14_56176 | TRIM59_82871 | DAZL_18008 | ID4_56956 | SST_83224 | DAZL_22631 | AHR_82118 | FBXO2_83916 | FAS_18144 | MAGEB2_71596 | MSH4_27679 | TADA3L_82759 | DIRAS3_9258 | SLIT3_23622 |
| sens HR-DOD  | 100%         | 100%        | 100%       | 100%        | 100%         | 100%       | 55%       | 55%       | 64%        | 64%       | 73%         | 73%       | 91%          | 91%        | 91%          | 82%         | 82%         |
| spec LR-SURV | 55%          | 55%         | 55%        | 55%         | 55%          | 55%        | 55%       | 55%       | 54%        | 54%       | 53%         | 53%       | 53%          | 53%        | 53%          | 50%         | 50%         |

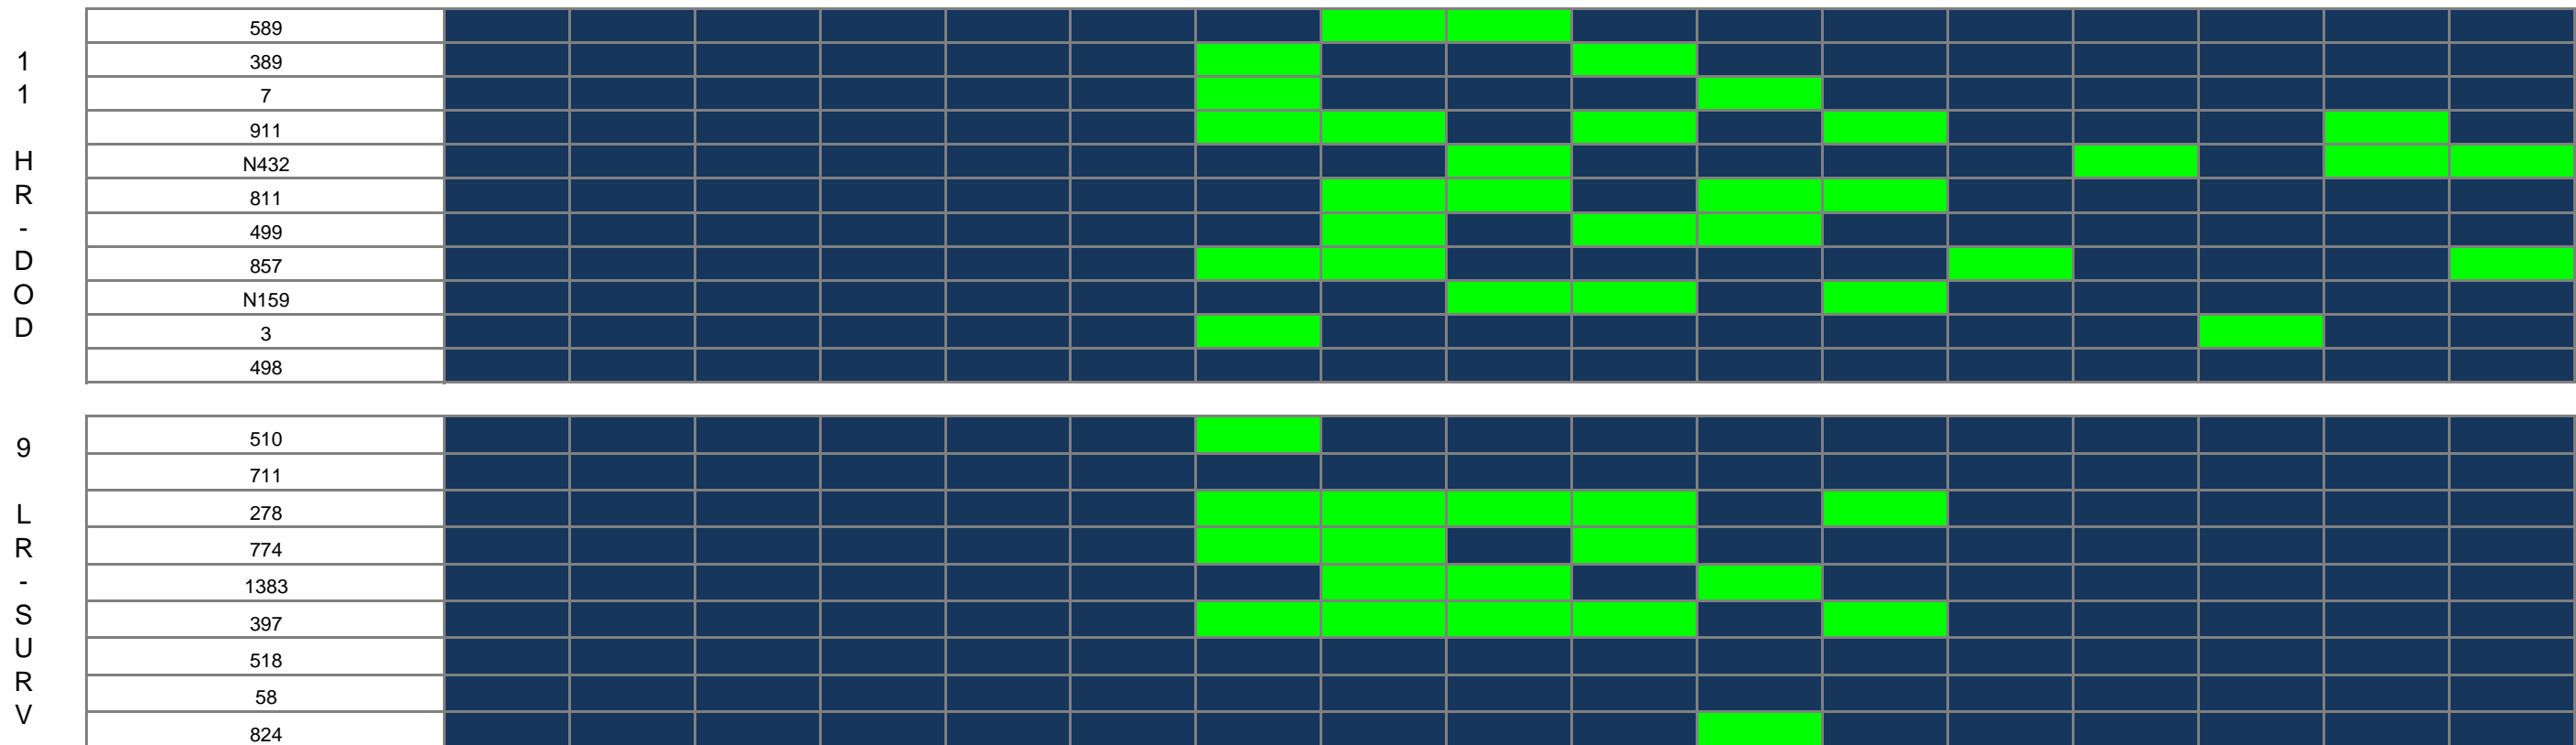

methylated  
unmethylated

| Rank         | 171        | 172          | 173        | 174       | 175          | 176          | 177        | 178         | 179         | 180        | 181         | 182            | 183     | 184        | 185         | 186        | 187         |
|--------------|------------|--------------|------------|-----------|--------------|--------------|------------|-------------|-------------|------------|-------------|----------------|---------|------------|-------------|------------|-------------|
| Assay        | ZIM2_82925 | HCRTR2_82341 | CYGB_17997 | SST_23808 | HCRTR2_82338 | CTDSPL_23803 | THBD_82802 | MYST4_83331 | FABP3_83914 | RBP4_24106 | FOXE1_13314 | TNFRSF10A_9277 | RUNX3_2 | XYLB_65485 | FABP5_82271 | XYLB_65481 | FBXO2_83919 |
| sens HR-DOD  | 64%        | 55%          | 55%        | 45%       | 45%          | 36%          | 27%        | 27%         | 27%         | 18%        | 18%         | 9%             | 9%      | 9%         | 9%          | 9%         | 9%          |
| spec LR-SURV | 50%        | 50%          | 50%        | 50%       | 50%          | 50%          | 50%        | 50%         | 50%         | 50%        | 50%         | 50%            | 50%     | 50%        | 50%         | 50%        | 50%         |

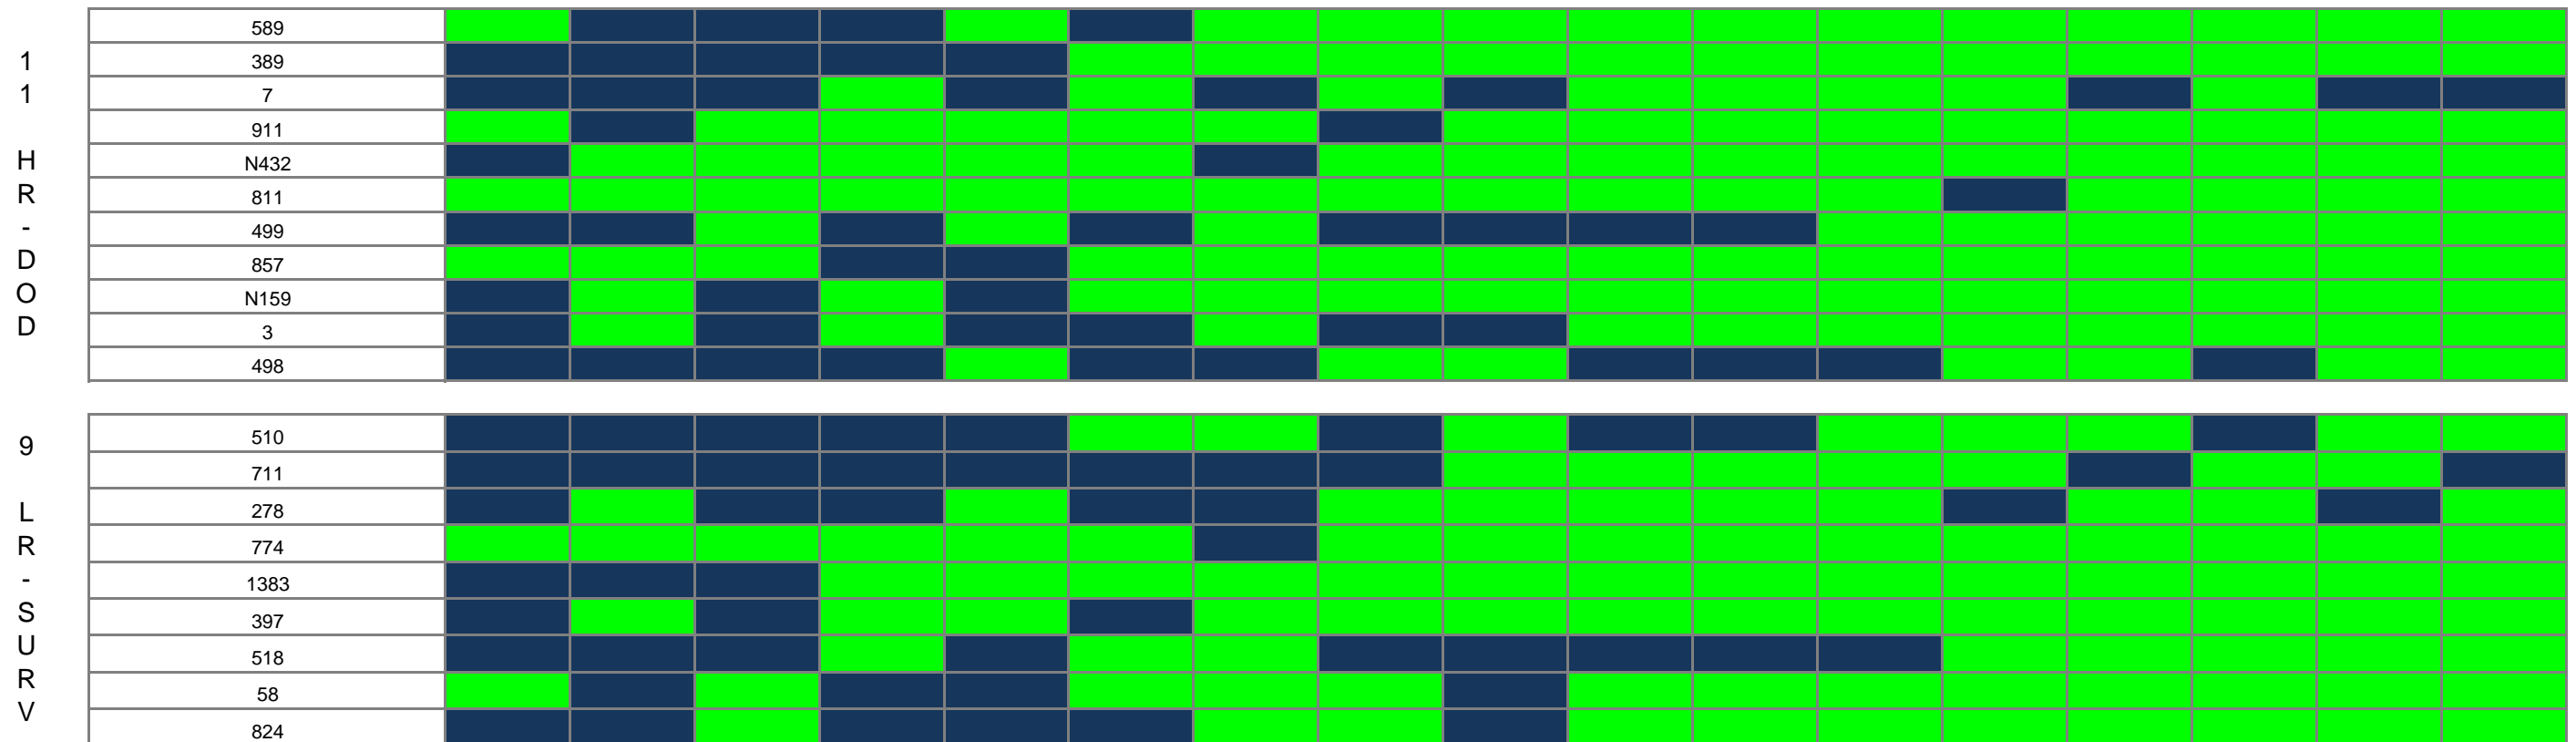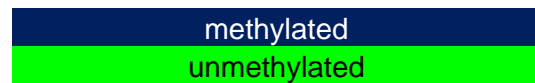



| Rank         | 188         | 189        | 190        | 191         | 192          | 193        | 194         | 195        | 196           | 197         | 198        | 199         | 200         | 201     | 202        | 203         | 204         |
|--------------|-------------|------------|------------|-------------|--------------|------------|-------------|------------|---------------|-------------|------------|-------------|-------------|---------|------------|-------------|-------------|
| Assay        | DUSP6_18077 | CTGF_31220 | DPP4_74913 | TNFRSF10B_2 | PCDH10_83191 | DLC1_83387 | FABP3_83912 | FBN2_18151 | SLC44A3_83942 | NPTX2_57779 | ESR2_55656 | PRDX2_83202 | EPHB2_62234 | EDNRB_1 | DBC1_23879 | CXCR4_70043 | GREM1_83135 |
| sens HR-DOD  | 9%          | 9%         | 9%         | 9%          | 73%          | 64%        | 55%         | 55%        | 27%           | 18%         | 18%        | 9%          | 9%          | 9%      | 27%        | 0%          | 0%          |
| spec LR-SURV | 50%         | 50%        | 50%        | 50%         | 47%          | 47%        | 46%         | 46%        | 43%           | 40%         | 33%        | 33%         | 33%         | 33%     | 30%        | 0%          |             |

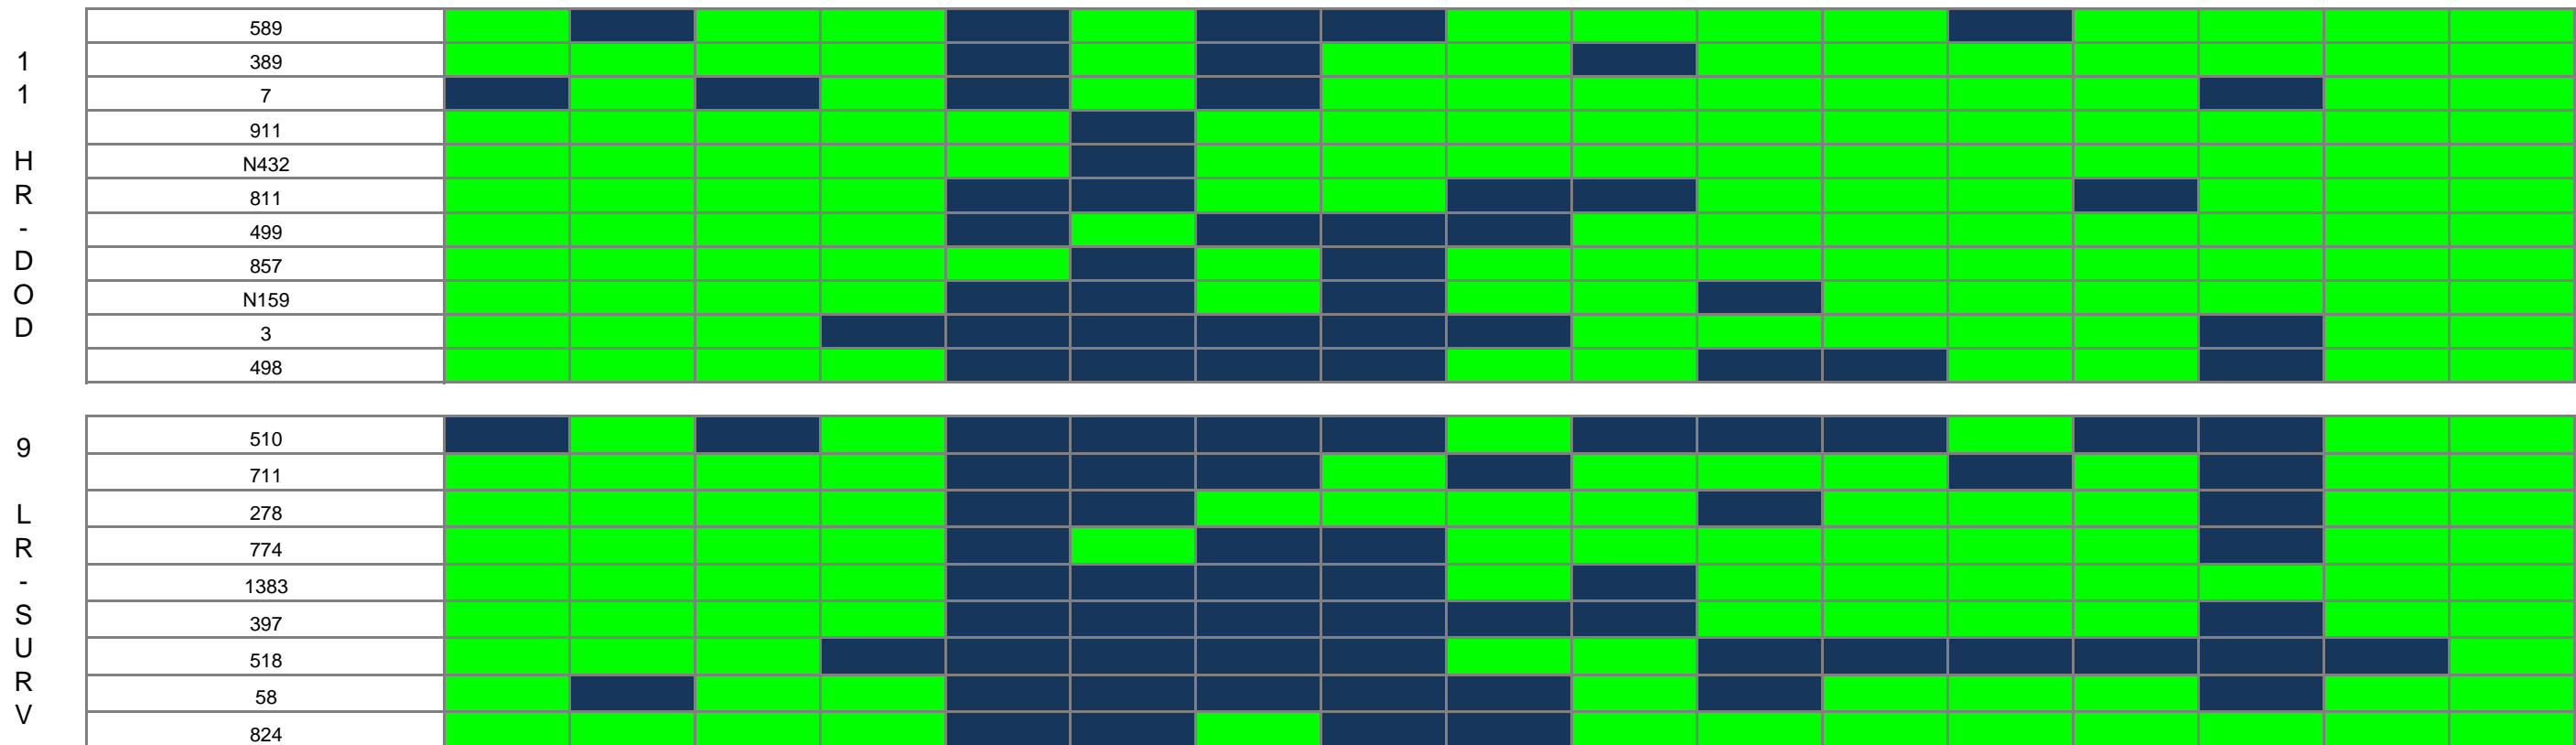

| Rank         | 205          | 206          | 207           | 208        | 209    | 210        | 211        | 212        |
|--------------|--------------|--------------|---------------|------------|--------|------------|------------|------------|
| Assay        | TRIM59_82865 | S100A6_83934 | HTATIP2_82369 | BCL2_17881 | CRBP_2 | PENK_18533 | BCL2_17882 | KRAS_24235 |
| sens HR-DOD  | 0%           | 0%           | 0%            | 0%         | 0%     | 0%         | 0%         | 0%         |
| spec LR-SURV |              |              |               |            |        |            |            |            |

|                                 |     |      |  |  |  |  |  |  |  |
|---------------------------------|-----|------|--|--|--|--|--|--|--|
| H<br>R<br>-<br>D<br>O<br>D      | 1   | 589  |  |  |  |  |  |  |  |
|                                 | 1   | 389  |  |  |  |  |  |  |  |
|                                 |     | 7    |  |  |  |  |  |  |  |
|                                 |     | 911  |  |  |  |  |  |  |  |
|                                 |     | N432 |  |  |  |  |  |  |  |
|                                 |     | 811  |  |  |  |  |  |  |  |
|                                 |     | 499  |  |  |  |  |  |  |  |
|                                 |     | 857  |  |  |  |  |  |  |  |
|                                 |     | N159 |  |  |  |  |  |  |  |
|                                 |     | 3    |  |  |  |  |  |  |  |
| L<br>R<br>-<br>S<br>U<br>R<br>V | 9   | 498  |  |  |  |  |  |  |  |
|                                 |     | 510  |  |  |  |  |  |  |  |
|                                 |     | 711  |  |  |  |  |  |  |  |
|                                 |     | 278  |  |  |  |  |  |  |  |
|                                 |     | 774  |  |  |  |  |  |  |  |
|                                 |     | 1383 |  |  |  |  |  |  |  |
|                                 |     | 397  |  |  |  |  |  |  |  |
|                                 |     | 518  |  |  |  |  |  |  |  |
|                                 |     | 58   |  |  |  |  |  |  |  |
|                                 | 824 |      |  |  |  |  |  |  |  |

methylated  
unmethylated
