# Supplementary material for: Genome-wide promoter methylation analysis in neuroblastoma identifies prognostic methylation biomarkers
Source: PubMed Central journal article supplement (PMC3491423; doi:10.1186/gb-2012-13-10-r95), 2012-10-03

**Figure 1:** Visualization of a part of the protocadherin  $\beta$  (*PCDHB*) family cluster in the Integrative Genomics Viewer (IGV). For each neuroblastoma cell line (SK-N-AS, CLB-GA, SH-SY5Y, SJNB-1, CHP-902R, IMR-32, LAN-2 and N206), the number of sequencing tags at each position is shown and the location of detected peaks is indicated with a red bar. The captured sequences clearly overlap with CpG islands in each individual member of this gene cluster.

**Figure 2:** Visualization of the promoter region of *HIST1H3C* in the Integrative Genomics Viewer (IGV). The four neuroblastoma cell lines at the bottom (CHP-902R, IMR-32, LAN-2 and N206) are *MYCN* amplified. Three of these cell lines clearly show sequence tags in the CpG island, while the four neuroblastoma cell lines on top (SK-N-AS, CLB-GA, SH-SY5Y and SJNB-1), which are *MYCN* single copy cell lines, do not show any signal.

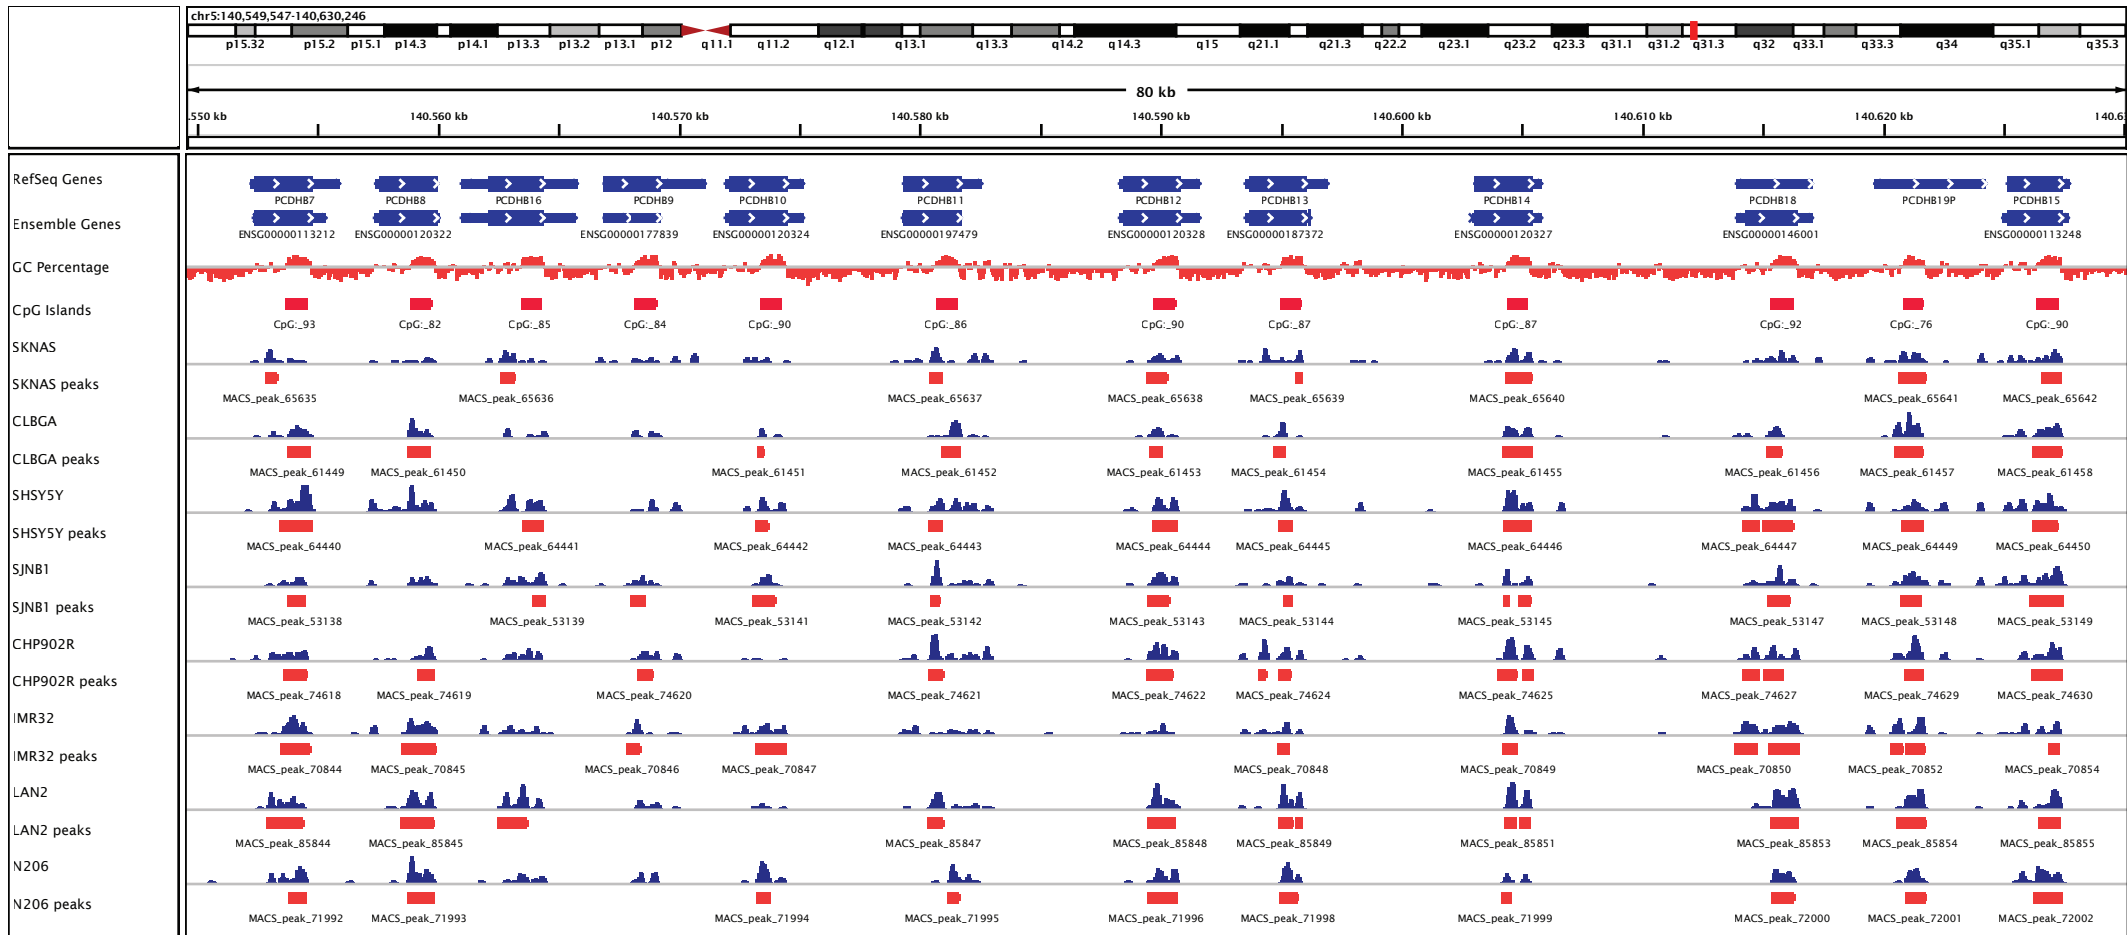

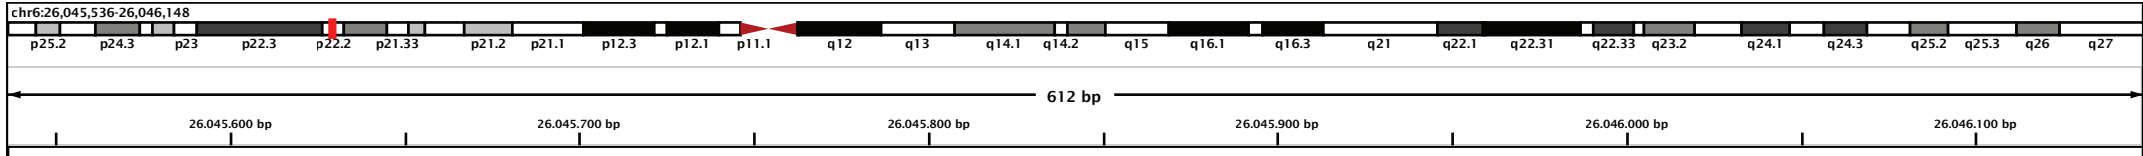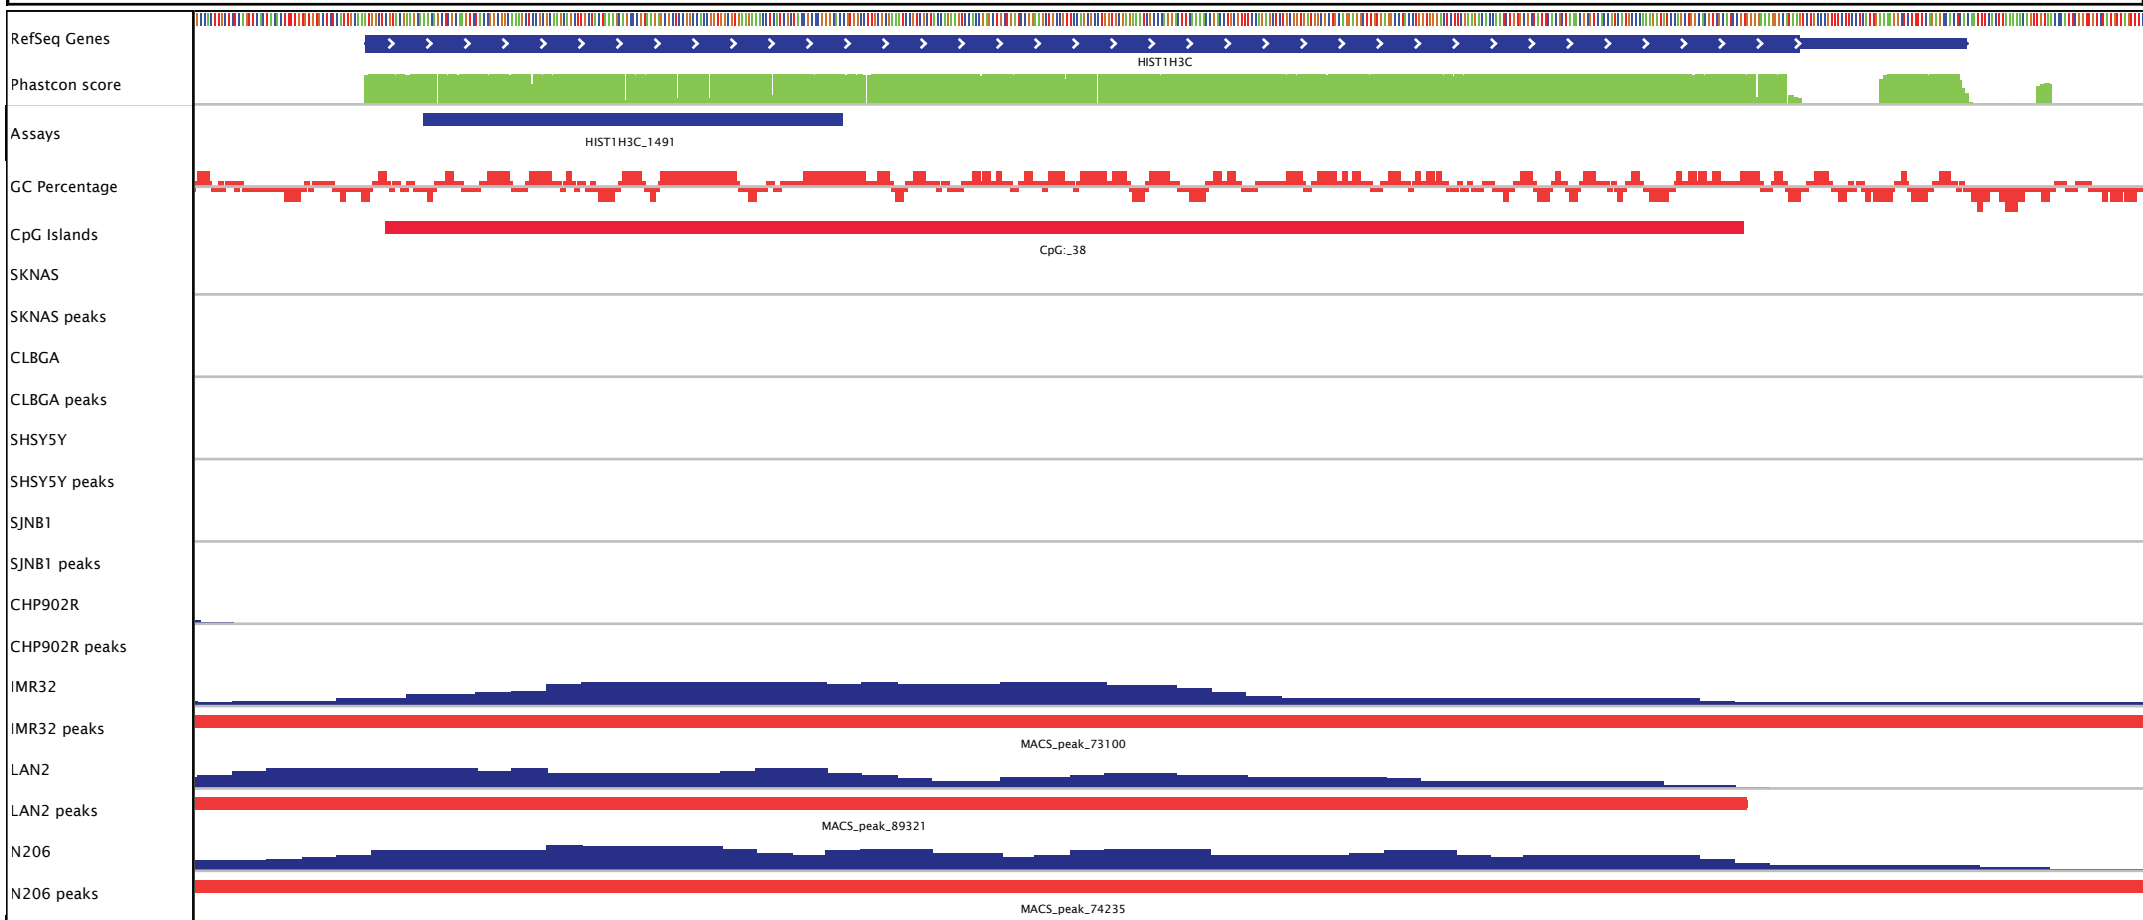

Supplement: gb-2012-13-10-r95-S2.pdf [file gb-2012-13-10-r95-S2.pdf]
