# Supplementary material for: Genome-wide promoter methylation analysis in neuroblastoma identifies prognostic methylation biomarkers
Source: PubMed Central journal article supplement (PMC3491423; doi:10.1186/gb-2012-13-10-r95), 2012-10-03
Supplement: gb-2012-13-10-r95-S5.pdf [file gb-2012-13-10-r95-S5.pdf]

**Part *HIST1H3C* and *ACSS3* qPCR mRNA assay:** qPCR mRNA assays used in the mRNA expression profiling of the DNA-methylation biomarkers *HIST1H3C* and *ACSS3*. For each gene, the assay name and corresponding forward and reverse primer (5' to 3') are indicated.

**Part *HIST1H3C* – *ACSS3* MSP cell lines:** Results of the *HIST1H3C* and *ACSS3* MSP screen on 31 neuroblastoma cell lines. The methylation call (dark blue is methylated, green unmethylated) of each cell line is indicated, as well as the *MYCN* status.

**Part *HIST1H3C* qPCR cell lines:** Results of the mRNA expression measurement of the DNA-methylation biomarker *HIST1H3C*. The Cq values were converted to relative quantities and converted to log<sub>2</sub> values. Relative gene expression levels were then normalized using the geometric mean of the reference sequences *SDHA*, *UBC* and *AluSq*. These logged and normalized qPCR data are given.

| <b>Name</b>     | <b>Forward primer</b> | <b>Reverse primer</b> |
|-----------------|-----------------------|-----------------------|
| <i>HIST1H3C</i> | AAACAGCTCGCAAGTCTAC   | TAGCGATGAGGTTTCTTCAC  |
| <i>ACSS3</i>    | GTCATGCTACTGGTCAAT    | AACTGTTGTGTTCCCATGAA  |

| Cell line  | MYCN | HIST1H3C     | ACSS3        |
|------------|------|--------------|--------------|
| STA-NB-8   | 1    | Unmethylated | Methylated   |
| SMS-KCNR   | 1    | Unmethylated | Methylated   |
| STA-NB-9   | 1    | Unmethylated | Methylated   |
| STA-NB-1.2 | 1    | Unmethylated | Methylated   |
| NGP        | 1    | Unmethylated | Methylated   |
| LA-N-5     | 1    | Unmethylated | Methylated   |
| SK-N-BE_2c | 1    | Methylated   | Methylated   |
| SJNB-10    | 1    | Methylated   | Methylated   |
| CHP-902R   | 1    | Methylated   | Methylated   |
| STA-NB-3   | 1    | Methylated   | Methylated   |
| NB-1       | 1    | Methylated   | Methylated   |
| SMS-KAN    | 1    | Methylated   | Methylated   |
| NLF        | 1    | Methylated   | Methylated   |
| IMR32      | 1    | Methylated   | Methylated   |
| CHP-134    | 1    | Methylated   | Methylated   |
| SK-N-BE    | 1    | Methylated   | Methylated   |
| NMB        | 1    | Methylated   | Methylated   |
| UKF-NB3    | 1    | Methylated   | Methylated   |
| TR-14      | 1    | Methylated   | Methylated   |
| N206       | 1    | Methylated   | Methylated   |
| Kelly      | 1    | Methylated   | Methylated   |
| CLB-GA     | 0    | Unmethylated | Unmethylated |
| SK-N-AS    | 0    | Unmethylated | Unmethylated |
| SH-SY5Y    | 0    | Unmethylated | Unmethylated |
| ACN        | 0    | Unmethylated | Methylated   |
| NBL-S      | 0    | Unmethylated | Methylated   |
| GIMEN      | 0    | Unmethylated | Methylated   |
| SK-N-SH    | 0    | Unmethylated | Unmethylated |
| SHEP       | 0    | Unmethylated | Unmethylated |
| SK-N-FI    | 0    | Methylated   | Unmethylated |
| LA-N-6     | 0    | Methylated   | Unmethylated |

|              |
|--------------|
| Methylated   |
| Unmethylated |

MYCN=1 : MYCN amplified  
MYCN=0 : MYCN single copy

| Cell line  | MYCN status | Alu-sq CNRQ | Alu-sq SE(CNRQ) | SDHA CNRQ   | SDHA SE(CNRQ) | UBC CNRQ    | UBC SE(CNRQ) | HIST1H3C CNRQ | HIST1H3C SE(CNRQ) |
|------------|-------------|-------------|-----------------|-------------|---------------|-------------|--------------|---------------|-------------------|
| SK-N-AS    | 0           | -1,672E-002 | 1,591E+000      | -2,463E-002 | 1,108E+000    | 4,135E-002  | 1,014E+000   | 1,041E+000    | 1,330E+000        |
| SJNB-10    | 1           | 4,449E-002  | 4,636E-001      | -4,771E-002 | 5,751E-001    | 3,221E-003  | 3,911E+000   | -1,264E+000   | 2,510E-003        |
| NB-1       | 1           | 1,077E-001  | 2,567E+000      | -5,825E-002 | 1,026E+000    | -4,946E-002 | 1,240E+000   | 8,584E-001    | 5,764E-001        |
| IMR32      | 1           | 1,734E-001  | 5,734E-001      | -5,423E-002 | 3,672E-001    | -1,192E-001 | 1,387E-001   | -1,204E+000   | 5,426E-003        |
| SKNFI      | 0           | 7,861E-002  | 4,151E-001      | -1,114E-001 | 5,295E-001    | 3,282E-002  | 8,039E-001   | -1,141E+000   | 1,790E-002        |
| NLF        | 1           | 5,151E-002  | 3,585E-001      | 4,812E-002  | 8,320E-001    | -9,963E-002 | 2,107E-001   | -4,591E-001   | 3,354E-002        |
| NBL-S      | 0           | 3,145E-002  | 1,890E+000      | -1,119E-001 | 1,479E-001    | 8,049E-002  | 6,244E-001   | 1,177E+000    | 8,499E-001        |
| STA-NB-1.2 | 1           | 1,589E-001  | 2,550E-001      | -1,892E-001 | 2,235E-001    | 3,031E-002  | 7,907E-001   | 1,140E+000    | 8,258E-001        |
| CLBGA      | 0           | 1,941E-002  | 4,283E-001      | 7,922E-002  | 4,496E-002    | -9,863E-002 | 2,067E-002   | 8,168E-001    | 5,563E-001        |
| SKNBE(2c)  | 1           | -1,632E-001 | 4,955E-002      | 1,254E-001  | 9,775E-002    | 3,784E-002  | 3,014E-001   | 9,984E-001    | 7,980E-002        |
| N206       | 1           | -6,137E-002 | 1,033E-001      | 4,360E-002  | 2,519E-001    | 1,777E-002  | 4,283E-001   | -1,577E+000   | 1,365E-003        |
| CHP-902R   | 1           | 1,539E-002  | 5,456E-001      | -1,280E-001 | 6,193E-002    | 1,126E-001  | 2,575E-001   | 7,420E-001    | 1,057E-001        |
| GIMEN      | 0           | -1,075E-001 | 4,013E-001      | -1,052E-003 | 3,834E+001    | 1,086E-001  | 2,767E-001   | 1,024E+000    | 2,570E-001        |
| SK-N-SH    | 0           | 1,338E-001  | 2,674E-001      | -1,330E-001 | 1,826E-001    | -7,930E-004 | 8,269E+001   | 6,542E-001    | 2,274E-001        |
| SK-N-BE    | 1           | -1,416E-001 | 6,973E-002      | 1,108E-001  | 8,345E-002    | 3,082E-002  | 5,712E-001   | 6,934E-001    | 1,570E-001        |
| CHP-134    | 1           | -7,442E-002 | 1,481E-001      | 1,058E-001  | 4,231E-001    | -3,140E-002 | 4,359E-001   | -2,065E+000   | 1,000E-003        |
| SMS-KAN    | 1           | 4,048E-002  | 3,663E-001      | 1,229E-001  | 3,274E-001    | -1,633E-001 | 4,408E-002   | -1,450E+000   | 4,611E-003        |
| NMB        | 1           | 1,343E-003  | 1,391E+001      | 1,601E-002  | 1,515E+000    | -1,735E-002 | 1,811E+000   | -1,844E+000   | 1,913E-004        |
| NGP        | 1           | 5,357E-003  | 1,069E+000      | 1,099E-002  | 3,473E-001    | -1,635E-002 | 5,686E-001   | 1,038E+000    | 2,869E-001        |
| SH-SY5Y    | 0           | 7,710E-002  | 3,409E-001      | 1,350E-002  | 8,436E-001    | -9,060E-002 | 2,215E-001   | 1,132E+000    | 8,553E-001        |
| TR-14      | 1           | 1,188E-002  | 1,820E+000      | 1,274E-001  | 1,506E-001    | -1,393E-001 | 4,319E-002   | -1,033E+000   | 2,788E-003        |
| LAN-5      | 1           | -1,808E-001 | 1,372E-001      | 1,545E-001  | 4,100E-001    | 2,630E-002  | 8,364E-001   | 1,544E+000    | 1,587E+000        |
| UKF-NB3    | 1           | -3,674E-003 | 6,088E+000      | 1,991E-001  | 8,749E-002    | -1,955E-001 | 3,945E-002   | 7,982E-001    | 6,430E-001        |
| SMS-KCNR   | 1           | 5,754E-002  | 2,699E-001      | -7,380E-002 | 2,602E-001    | 1,627E-002  | 8,682E-001   | 1,177E+000    | 7,007E-001        |
| STA-NB-3   | 1           | -5,535E-002 | 1,539E-001      | -8,584E-002 | 5,991E-002    | 1,412E-001  | 1,729E-001   | -1,690E+000   | 3,707E-004        |
| SHEP       | 0           | -1,321E-002 | 4,335E+000      | -6,025E-002 | 3,844E-001    | 7,346E-002  | 3,187E-001   | 4,079E-001    | 3,260E-001        |
| STA-NB-9   | 1           | -6,589E-002 | 4,406E-001      | -3,918E-002 | 8,481E-001    | 1,051E-001  | 4,568E-001   | 4,982E-001    | 1,825E-001        |
| STA-NB-8   | 1           | 5,859E-003  | 3,175E+000      | -6,828E-002 | 6,381E-001    | 6,242E-002  | 3,814E-001   | 4,435E-001    | 1,474E-001        |
| ACN        | 0           | -1,000E-001 | 9,114E-002      | 6,216E-002  | 5,137E-001    | 3,784E-002  | 6,031E-001   | 1,140E+000    | 5,969E-001        |
| Kelly      | 1           | 2,848E-003  | 2,507E+000      | -5,775E-002 | 3,371E-001    | 5,490E-002  | 1,593E-001   | -1,436E+000   | 4,339E-003        |
| LA-N-6     | 0           | -3,328E-002 | 3,091E-001      | 2,504E-002  | 1,412E+000    | 8,238E-003  | 1,436E+000   | -2,159E+000   | 8,909E-005        |

MYCN=1 : MYCN amplified

MYCN=0 : MYCN single copy
